# Supplementary material
Source: PubMed Central journal article supplement (PMC1560014)
Supplement: rspb20053276s03.pdf [file rspb20053276s03.pdf]

| Species ID | micro-crustacea | macro-crustacea | micro-bivalvia | macro-bivalvia | micro-gastropoda | macro-gastropoda | Brachyura | Polychaeta | Foraminifera | Echinodermata | Copepoda | gnathid Isopod | Anomura | fish | amorphous organic matter | Black AOM | algae | coral organic matter | sediment |
|------------|-----------------|-----------------|----------------|----------------|------------------|------------------|-----------|------------|--------------|---------------|----------|----------------|---------|------|--------------------------|-----------|-------|----------------------|----------|
| L56        | 19              | 0               | 4              | 16             | 16               | 0                | 0         | 1          | 0            | 0             | 0        | 0              | 0       | 0    | 0                        | 0         | 0     | 0                    | 0        |
| L65        | 0               | 0               | 16             | 10             | 10               | 0                | 0         | 14         | 0            | 0             | 0        | 0              | 0       | 0    | 0                        | 0         | 0     | 0                    | 0        |
| L73        | 0               | 0               | 0              | 40             | 40               | 0                | 0         | 0          | 0            | 0             | 0        | 0              | 0       | 0    | 0                        | 0         | 0     | 0                    | 0        |
| L13        | 0               | 0               | 0              | 0              | 0                | 0                | 0         | 0          | 0            | 7             | 27       | 0              | 0       | 0    | 0                        | 0         | 0     | 0                    | 0        |
| L9         | 40              | 0               | 0              | 0              | 0                | 0                | 0         | 0          | 0            | 0             | 0        | 0              | 0       | 0    | 0                        | 0         | 0     | 0                    | 0        |
| L3         | 38              | 0               | 0              | 2              | 2                | 0                | 0         | 0          | 0            | 0             | 0        | 0              | 0       | 0    | 0                        | 0         | 0     | 0                    | 0        |
| L9         | 35              | 0               | 0              | 0              | 0                | 0                | 0         | 5          | 0            | 0             | 0        | 0              | 0       | 0    | 0                        | 0         | 0     | 0                    | 0        |
| L39        | 37              | 0               | 0              | 0              | 0                | 0                | 0         | 0          | 3            | 0             | 0        | 0              | 0       | 0    | 0                        | 0         | 0     | 0                    | 0        |
| L76        | 0               | 0               | 0              | 0              | 0                | 17               | 9         | 0          | 0            | 0             | 0        | 0              | 0       | 0    | 0                        | 0         | 0     | 0                    | 0        |
| L39        | 26              | 0               | 0              | 6              | 6                | 0                | 0         | 0          | 0            | 0             | 0        | 0              | 0       | 0    | 8                        | 0         | 0     | 0                    | 0        |
| L76        | 0               | 0               | 0              | 29             | 29               | 0                | 0         | 0          | 0            | 0             | 0        | 0              | 0       | 0    | 11                       | 0         | 0     | 0                    | 0        |
| L24        | 0               | 0               | 0              | 0              | 0                | 0                | 0         | 0          | 0            | 0             | 0        | 0              | 0       | 40   | 0                        | 0         | 0     | 0                    | 0        |
| L82        | 0               | 0               | 0              | 0              | 0                | 0                | 0         | 0          | 0            | 0             | 0        | 0              | 0       | 40   | 0                        | 0         | 0     | 0                    | 0        |
| L40        | 0               | 0               | 0              | 0              | 0                | 0                | 0         | 0          | 0            | 0             | 0        | 0              | 0       | 0    | 0                        | 0         | 0     | 0                    | 0        |
| L56        | 0               | 0               | 0              | 40             | 40               | 0                | 0         | 0          | 0            | 0             | 0        | 0              | 0       | 0    | 0                        | 0         | 0     | 0                    | 0        |
| L54        | 0               | 0               | 0              | 0              | 0                | 0                | 32        | 0          | 0            | 0             | 0        | 0              | 0       | 0    | 8                        | 0         | 0     | 0                    | 0        |
| L56        | 0               | 0               | 0              | 0              | 0                | 34               | 0         | 0          | 0            | 0             | 0        | 0              | 0       | 0    | 0                        | 0         | 0     | 0                    | 0        |
| L65        | 32              | 0               | 0              | 8              | 8                | 0                | 0         | 0          | 0            | 0             | 0        | 0              | 0       | 0    | 0                        | 0         | 0     | 0                    | 0        |
| L3         | 32              | 0               | 6              | 1              | 1                | 0                | 0         | 1          | 0            | 0             | 0        | 0              | 0       | 0    | 0                        | 0         | 0     | 0                    | 0        |
| L84        | 0               | 0               | 0              | 21             | 21               | 5                | 0         | 0          | 0            | 0             | 0        | 0              | 0       | 0    | 14                       | 0         | 0     | 0                    | 0        |
| L71        | 0               | 0               | 0              | 0              | 0                | 0                | 0         | 0          | 0            | 0             | 0        | 0              | 0       | 40   | 0                        | 0         | 0     | 0                    | 0        |
| L71        | 0               | 0               | 0              | 0              | 0                | 0                | 0         | 0          | 0            | 0             | 0        | 0              | 0       | 19   | 0                        | 0         | 0     | 0                    | 0        |
| L71        | 0               | 0               | 0              | 0              | 0                | 0                | 0         | 0          | 0            | 0             | 0        | 0              | 0       | 40   | 0                        | 0         | 0     | 0                    | 0        |
| L56        | 0               | 10              | 0              | 23             | 23               | 7                | 0         | 0          | 0            | 0             | 0        | 0              | 0       | 0    | 0                        | 0         | 0     | 0                    | 0        |
| L54        | 2               | 38              | 0              | 0              | 0                | 0                | 0         | 0          | 0            | 0             | 0        | 0              | 0       | 0    | 0                        | 0         | 0     | 0                    | 0        |
| L13        | 0               | 0               | 0              | 0              | 0                | 0                | 0         | 0          | 0            | 40            | 0        | 0              | 0       | 0    | 0                        | 0         | 0     | 0                    | 0        |
| L82        | 0               | 40              | 0              | 0              | 0                | 0                | 0         | 0          | 0            | 0             | 0        | 0              | 0       | 0    | 0                        | 0         | 0     | 0                    | 0        |
| L84        | 0               | 0               | 0              | 0              | 0                | 8                | 32        | 0          | 0            | 0             | 0        | 0              | 0       | 0    | 0                        | 0         | 0     | 0                    | 0        |
| L3         | 33              | 0               | 0              | 2              | 2                | 0                | 3         | 2          | 0            | 0             | 0        | 0              | 0       | 0    | 0                        | 0         | 0     | 0                    | 0        |
| L84        | 0               | 0               | 0              | 0              | 0                | 40               | 0         | 0          | 0            | 0             | 0        | 0              | 0       | 0    | 0                        | 0         | 0     | 0                    | 0        |
| L3         | 13              | 0               | 0              | 2              | 1                | 0                | 0         | 2          | 0            | 0             | 0        | 0              | 0       | 0    | 0                        | 0         | 0     | 0                    | 22       |
| L13        | 37              | 0               | 0              | 1              | 1                | 0                | 0         | 0          | 0            | 0             | 0        | 0              | 0       | 0    | 2                        | 0         | 0     | 0                    | 0        |
| L63        | 0               | 0               | 6              | 3              | 3                | 0                | 31        | 0          | 0            | 0             | 0        | 0              | 0       | 0    | 0                        | 0         | 0     | 0                    | 0        |
| L35        | 11              | 0               | 0              | 1              | 1                | 0                | 0         | 3          | 6            | 0             | 0        | 0              | 0       | 0    | 0                        | 0         | 0     | 0                    | 19       |
| L13        | 0               | 0               | 0              | 0              | 0                | 0                | 18        | 0          | 0            | 0             | 0        | 0              | 0       | 0    | 0                        | 0         | 0     | 0                    | 0        |
| L59        | 0               | 0               | 0              | 0              | 0                | 0                | 12        | 0          | 0            | 0             | 0        | 0              | 0       | 7    | 21                       | 0         | 0     | 0                    | 0        |
| L50        | 0               | 0               | 27             | 0              | 0                | 13               | 0         | 0          | 0            | 0             | 0        | 0              | 0       | 0    | 0                        | 0         | 0     | 0                    | 0        |
| L71        | 0               | 0               | 0              | 0              | 0                | 0                | 0         | 0          | 0            | 0             | 0        | 0              | 0       | 40   | 0                        | 0         | 0     | 0                    | 0        |
| L39        | 0               | 0               | 0              | 0              | 0                | 0                | 40        | 0          | 0            | 0             | 0        | 0              | 0       | 0    | 0                        | 0         | 0     | 0                    | 0        |
| L24        | 0               | 0               | 0              | 0              | 0                | 0                | 6         | 0          | 0            | 0             | 0        | 0              | 0       | 0    | 34                       | 0         | 0     | 0                    | 0        |
| L3         | 16              | 0               | 0              | 2              | 2                | 0                | 4         | 7          | 4            | 0             | 0        | 0              | 0       | 0    | 0                        | 0         | 0     | 0                    | 7        |
| L13        | 0               | 0               | 0              | 0              | 0                | 0                | 0         | 0          | 0            | 0             | 40       | 0              | 0       | 0    | 0                        | 0         | 0     | 0                    | 0        |
| L3         | 0               | 0               | 0              | 5              | 5                | 0                | 23        | 0          | 0            | 0             | 0        | 0              | 0       | 0    | 0                        | 0         | 0     | 0                    | 12       |
| L24        | 0               | 3               | 0              | 35             | 35               | 0                | 0         | 0          | 2            | 0             | 0        | 0              | 0       | 0    | 0                        | 0         | 0     | 0                    | 0        |
| L45        | 0               | 0               | 0              | 3              | 3                | 0                | 37        | 0          | 0            | 0             | 0        | 0              | 0       | 0    | 0                        | 0         | 0     | 0                    | 0        |
| L21        | 0               | 0               | 0              | 0              | 0                | 0                | 40        | 0          | 0            | 0             | 0        | 0              | 0       | 0    | 0                        | 0         | 0     | 0                    | 0        |
| L21        | 37              | 0               | 0              | 0              | 0                | 0                | 0         | 0          | 0            | 0             | 0        | 0              | 0       | 0    | 0                        | 0         | 0     | 0                    | 0        |
| L21        | 0               | 0               | 0              | 0              | 0                | 0                | 40        | 0          | 0            | 0             | 0        | 0              | 0       | 0    | 0                        | 0         | 0     | 0                    | 0        |
| L16        | 0               | 0               | 0              | 0              | 0                | 0                | 0         | 0          | 0            | 40            | 0        | 0              | 0       | 0    | 0                        | 0         | 0     | 0                    | 0        |
| L21        | 0               | 0               | 0              | 0              | 0                | 0                | 40        | 0          | 0            | 0             | 0        | 0              | 0       | 0    | 0                        | 0         | 0     | 0                    | 0        |
| L16        | 40              | 0               | 0              | 0              | 0                | 0                | 0         | 0          | 0            | 0             | 0        | 0              | 0       | 0    | 0                        | 0         | 0     | 0                    | 0        |
| L21        | 0               | 0               | 0              | 0              | 0                | 0                | 0         | 0          | 0            | 0             | 0        | 0              | 0       | 0    | 40                       | 0         | 0     | 0                    | 0        |
| L16        | 40              | 0               | 0              | 0              | 0                | 0                | 0         | 0          | 0            | 0             | 0        | 0              | 0       | 0    | 0                        | 0         | 0     | 0                    | 0        |
| L21        | 0               | 0               | 0              | 0              | 0                | 0                | 40        | 0          | 0            | 0             | 0        | 0              | 0       | 0    | 0                        | 0         | 0     | 0                    | 0        |
| L16        | 40              | 0               | 0              | 0              | 0                | 0                | 0         | 11         | 0            | 29            | 0        | 0              | 0       | 0    | 0                        | 0         | 0     | 0                    | 0        |
| L3         | 37              | 0               | 0              | 3              | 3                | 0                | 0         | 0          | 0            | 0             | 0        | 0              | 0       | 0    | 0                        | 0         | 0     | 0                    | 0        |
| L3         | 33              | 4               | 0              | 2              | 2                | 0                | 1         | 0          | 0            | 0             | 0        | 0              | 0       | 0    | 0                        | 0         | 0     | 0                    | 0        |
| L13        | 40              | 0               | 0              | 0              | 0                | 0                | 0         | 0          | 0            | 0             | 0        | 0              | 0       | 0    | 0                        | 0         | 0     | 0                    | 0        |
| L50        | 0               | 0               | 7              | 0              | 0                | 0                | 33        | 0          | 0            | 0             | 0        | 0              | 0       | 0    | 0                        | 0         | 0     | 0                    | 0        |
| L35        | 34              | 0               | 0              | 0              | 0                | 0                | 6         | 0          | 0            | 0             | 0        | 0              | 0       | 0    | 0                        | 0         | 0     | 0                    | 0        |
| L58        | 0               | 40              | 0              | 0              | 0                | 0                | 0         | 0          | 0            | 0             | 0        | 0              | 0       | 0    | 0                        | 0         | 0     | 0                    | 0        |
| L57        | 29              | 0               | 0              | 8              | 8                | 0                | 3         | 0          | 0            | 0             | 0        | 0              | 0       | 0    | 0                        | 0         | 0     | 0                    | 0        |
| L71        | 0               | 9               | 0              | 0              | 0                | 0                | 0         | 0          | 0            | 0             | 0        | 0              | 0       | 31   | 0                        | 0         | 0     | 0                    | 0        |
| L45        | 34              | 0               | 0              | 6              | 6                | 0                | 0         | 0          | 0            | 0             | 0        | 0              | 0       | 0    | 0                        | 0         | 0     | 0                    | 0        |
| L82        | 0               | 0               | 0              | 0              | 0                | 0                | 0         | 0          | 0            | 0             | 0        | 0              | 0       | 40   | 0                        | 0         | 0     | 0                    | 0        |
| L31        | 0               | 0               | 0              | 40             | 40               | 0                | 0         | 0          | 0            | 0             | 0        | 0              | 0       | 0    | 0                        | 0         | 0     | 0                    | 0        |
| L31        | 0               | 0               | 0              | 34             | 34               | 0                | 0         | 0          | 0            | 0             | 0        | 0              | 0       | 6    | 0                        | 0         | 0     | 0                    | 0        |
| L14        | 0               | 9               | 0              | 3              | 3                | 0                | 0         | 0          | 0            | 0             | 28       | 0              | 0       | 0    | 0                        | 0         | 0     | 0                    | 0        |
| L45        | 4               | 0               | 0              | 12             | 12               | 0                | 0         | 0          | 0            | 0             | 0        | 0              | 0       | 0    | 0                        | 0         | 0     | 0                    | 24       |
| L31        | 13              | 0               | 3              | 24             | 24               | 0                | 0         | 0          | 0            | 0             | 0        | 0              | 0       | 0    | 0                        | 0         | 0     | 0                    | 0        |
| L31        | 0               | 0               | 0              | 11             | 11               | 0                | 0         | 0          | 0            | 0             | 0        | 0              | 0       | 7    | 0                        | 0         | 0     | 0                    | 22       |
| L58        | 0               | 0               | 17             | 0              | 0                | 23               | 0         | 0          | 0            | 0             | 0        | 0              | 0       | 0    | 0                        | 0         | 0     | 0                    | 0        |
| L31        | 0               | 0               | 0              | 39             | 39               | 0                | 0         | 0          | 0            | 0             | 0        | 0              | 0       | 1    | 0                        | 0         | 0     | 0                    | 0        |
| L31        | 36              | 0               | 0              | 4              | 4                | 0                | 0         | 0          | 0            | 0             | 0        | 0              | 0       | 0    | 0                        | 0         | 0     | 0                    | 0        |
| L41        | 2               | 0               | 10             | 14             | 14               | 0                | 0         | 0          | 0            | 0             | 0        | 0              | 0       | 0    | 0                        | 0         | 0     | 0                    | 14       |
| L31        | 0               | 0               | 0              | 7              | 7                | 0                | 33        | 0          | 0            | 0             | 0        | 0              | 0       | 0    | 0                        | 0         | 0     | 0                    | 0        |
| L31        | 0               | 0               | 0              | 3              | 3                | 0                | 37        | 0          | 0            | 0             | 0        | 0              | 0       | 0    | 0                        | 0         | 0     | 0                    | 0        |
| L14        | 1               | 0               | 0              | 11             | 11               | 0                | 4         | 0          | 0            | 24            | 0        | 0              | 0       | 0    | 0                        | 0         | 0     | 0                    | 0        |
| L9         | 0               | 0               | 0              | 0              | 0                | 0                | 0         | 0          | 0            | 33            | 0        | 0              | 0       | 0    | 0                        | 0         | 0     | 0                    | 7        |
| L31        | 0               | 0               | 0              | 40             | 40               | 0                | 0         | 0          | 0            | 0             | 0        | 0              | 0       | 0    | 0                        | 0         | 0     | 0                    | 0        |
| L31        | 29              | 0               | 8              | 0              | 0                | 0                | 0         | 1          | 2            | 0             | 0        | 0              | 0       | 0    | 0                        | 0         | 0     | 0                    | 0        |
| L11        | 0               | 0               | 0              | 13             | 13               | 0                | 0         | 3          | 0            | 14            | 0        | 0              | 0       | 0    | 0                        | 0         | 0     | 0                    | 10       |
| L26        | 31              | 0               | 0              | 9              | 9                | 0                | 0         | 0          | 0            | 0             | 0        | 0              | 0       | 0    | 0                        | 0         | 0     | 0                    | 0        |
| L11        | 0               | 3               | 0              | 3              | 3                | 0                | 3         | 2          | 0            | 23            | 0        | 0              | 0       | 0    | 0                        | 0         | 0     | 0                    | 6        |
| L26        | 0               | 0               | 0              | 20             | 20               | 0                | 0         | 0          | 0            | 0             | 0        | 0              | 0       | 0    | 0                        | 0         | 0     | 0                    | 0        |
| L54        | 0               | 0               | 0              | 0              | 0                | 40               | 0         | 0          | 0            | 0             | 0        | 0              | 0       | 0    | 0                        | 0         | 0     | 0                    | 0        |
| L13        | 40              | 0               | 0              | 0              | 0                | 0                | 0         | 0          | 0            | 0             | 0        | 0              | 0       | 0    | 0                        | 0         | 0     | 0                    | 0        |
| L39        | 0               | 0               | 2              | 3              | 3                | 0                | 1         | 0          | 4            | 0             | 0        | 0              | 0       | 7    | 13                       | 0         | 0     | 0                    | 6        |
| L45        | 0               | 0               | 0              | 39             | 39               | 0                | 0         | 0          | 0            | 0             | 0        | 1              | 0       | 0    | 0                        | 0         | 0     | 0                    | 0        |
| L36        | 28              | 0               | 0              | 1              | 1                | 0                | 0         | 0          | 0            | 0             | 0        | 0              | 0       | 11   | 0                        | 0         | 0     | 0                    | 0        |
| L36        | 0               | 2               | 0              | 32             | 32               | 6                | 0         | 0          | 0            | 0             | 0        | 0              | 0       | 0    | 0                        | 0         | 0     | 0                    | 0        |
| L49        | 0               | 0               | 0              | 0              | 0                | 0                | 0         | 0          | 0            | 0             | 0        | 0              | 0       | 40   | 0                        | 0         | 0     | 0                    | 0        |
| L87        | 0               | 0               | 0              | 0              | 0                | 0                | 0         | 0          | 0            | 0             | 0        | 0              | 0       | 0    | 0                        | 0         | 40    | 0                    | 0        |
| L11        | 0               | 6               | 0              | 6              | 6                | 0                | 1         | 0          | 0            | 19            | 0        | 0              | 0       | 0    | 0                        | 0         | 0     | 0                    | 8        |
| L22        | 35              | 0               | 0              | 5              | 5                | 0                | 0         | 0          | 0            | 0             | 0        | 0              | 0       | 0    | 0                        | 0         | 0     | 0                    | 0        |
| L39        | 0               | 0               | 3              | 0              | 0                | 0</              |           |            |              |               |          |                |         |      |                          |           |       |                      |          |



| Species ID | micro-crustacea | macro-crustacea | micro-bivalvia | macro-bivalvia | micro-gastropoda | macro-gastropoda | Brachyura | Polychaeta | Foraminifera | Echinodermata | Copepoda | gnathid Isopod | Anomura | fish | amorphous organic matter | Black AOM | algae | coral organic matter | sediment |
|------------|-----------------|-----------------|----------------|----------------|------------------|------------------|-----------|------------|--------------|---------------|----------|----------------|---------|------|--------------------------|-----------|-------|----------------------|----------|
| L20        | 0               | 12              | 0              | 0              | 0                | 0                | 0         | 0          | 0            | 0             | 28       | 0              | 0       | 0    | 0                        | 0         | 0     | 0                    | 0        |
| L20        | 40              | 0               | 0              | 0              | 0                | 0                | 0         | 0          | 0            | 0             | 0        | 0              | 0       | 0    | 0                        | 0         | 0     | 0                    | 0        |
| L20        | 0               | 0               | 0              | 0              | 0                | 0                | 0         | 0          | 0            | 0             | 40       | 0              | 0       | 0    | 0                        | 0         | 0     | 0                    | 0        |
| L20        | 0               | 20              | 0              | 0              | 0                | 0                | 0         | 0          | 0            | 0             | 20       | 0              | 0       | 0    | 0                        | 0         | 0     | 0                    | 0        |
| L20        | 0               | 10              | 0              | 0              | 0                | 0                | 0         | 0          | 0            | 0             | 30       | 0              | 0       | 0    | 0                        | 0         | 0     | 0                    | 0        |
| L20        | 0               | 0               | 0              | 0              | 0                | 0                | 0         | 0          | 0            | 0             | 40       | 0              | 0       | 0    | 0                        | 0         | 0     | 0                    | 0        |
| L20        | 0               | 6               | 0              | 0              | 0                | 0                | 0         | 0          | 0            | 0             | 34       | 0              | 0       | 0    | 0                        | 0         | 0     | 0                    | 0        |
| L20        | 0               | 3               | 0              | 0              | 0                | 0                | 0         | 0          | 0            | 0             | 37       | 0              | 0       | 0    | 0                        | 0         | 0     | 0                    | 0        |
| L20        | 0               | 0               | 0              | 0              | 0                | 0                | 0         | 0          | 0            | 0             | 40       | 0              | 0       | 0    | 0                        | 0         | 0     | 0                    | 0        |
| L20        | 40              | 0               | 0              | 0              | 0                | 0                | 0         | 0          | 0            | 0             | 0        | 0              | 0       | 0    | 0                        | 0         | 0     | 0                    | 0        |
| L39        | 0               | 0               | 0              | 34             | 34               | 0                | 6         | 0          | 0            | 0             | 0        | 0              | 0       | 0    | 0                        | 0         | 0     | 0                    | 0        |
| L37        | 3               | 0               | 0              | 0              | 0                | 37               | 0         | 0          | 0            | 0             | 0        | 0              | 0       | 0    | 0                        | 0         | 0     | 0                    | 0        |
| L82        | 0               | 40              | 0              | 0              | 0                | 0                | 0         | 0          | 0            | 0             | 0        | 0              | 0       | 0    | 0                        | 0         | 0     | 0                    | 0        |
| L21        | 0               | 0               | 0              | 0              | 0                | 0                | 0         | 0          | 0            | 40            | 0        | 0              | 0       | 0    | 0                        | 0         | 0     | 0                    | 0        |
| L39        | 0               | 0               | 0              | 0              | 0                | 0                | 40        | 0          | 0            | 0             | 0        | 0              | 0       | 0    | 0                        | 0         | 0     | 0                    | 0        |
| L21        | 40              | 0               | 0              | 0              | 0                | 0                | 0         | 0          | 0            | 0             | 0        | 0              | 0       | 0    | 0                        | 0         | 0     | 0                    | 0        |
| L21        | 10              | 0               | 0              | 0              | 0                | 0                | 0         | 0          | 0            | 0             | 0        | 0              | 0       | 0    | 0                        | 0         | 0     | 0                    | 30       |
| L21        | 15              | 0               | 0              | 0              | 0                | 0                | 0         | 4          | 0            | 0             | 0        | 0              | 0       | 0    | 0                        | 0         | 0     | 0                    | 21       |
| L39        | 9               | 0               | 13             | 0              | 0                | 0                | 11        | 0          | 0            | 0             | 0        | 0              | 0       | 7    | 0                        | 0         | 0     | 0                    | 0        |
| L21        | 3               | 0               | 0              | 0              | 0                | 0                | 0         | 0          | 0            | 0             | 0        | 0              | 0       | 37   | 0                        | 0         | 0     | 0                    | 0        |
| L39        | 27              | 0               | 1              | 0              | 0                | 0                | 0         | 0          | 0            | 0             | 0        | 0              | 0       | 9    | 0                        | 0         | 0     | 0                    | 0        |
| L21        | 0               | 0               | 0              | 0              | 0                | 0                | 0         | 0          | 1            | 17            | 0        | 0              | 0       | 0    | 0                        | 0         | 0     | 0                    | 22       |
| L39        | 0               | 0               | 0              | 0              | 0                | 0                | 0         | 0          | 0            | 0             | 0        | 0              | 0       | 40   | 0                        | 0         | 0     | 0                    | 0        |
| L41        | 0               | 0               | 0              | 4              | 4                | 0                | 9         | 0          | 0            | 0             | 0        | 0              | 0       | 27   | 0                        | 0         | 0     | 0                    | 0        |
| L50        | 0               | 0               | 0              | 0              | 0                | 0                | 0         | 0          | 0            | 0             | 0        | 0              | 0       | 40   | 0                        | 0         | 0     | 0                    | 0        |
| L65        | 0               | 0               | 35             | 5              | 5                | 0                | 0         | 0          | 0            | 0             | 0        | 0              | 0       | 0    | 0                        | 0         | 0     | 0                    | 0        |
| L16        | 40              | 0               | 0              | 0              | 0                | 0                | 0         | 0          | 0            | 0             | 0        | 0              | 0       | 0    | 0                        | 0         | 0     | 0                    | 0        |
| L45        | 0               | 0               | 0              | 6              | 6                | 0                | 0         | 0          | 0            | 0             | 0        | 0              | 0       | 0    | 34                       | 0         | 0     | 0                    | 0        |
| L16        | 0               | 0               | 0              | 0              | 0                | 0                | 0         | 0          | 0            | 0             | 0        | 0              | 0       | 0    | 40                       | 0         | 0     | 0                    | 0        |
| L3         | 39              | 0               | 0              | 1              | 1                | 0                | 0         | 0          | 0            | 0             | 0        | 0              | 0       | 1    | 0                        | 0         | 0     | 0                    | 0        |
| L56        | 0               | 0               | 0              | 29             | 29               | 0                | 0         | 0          | 0            | 0             | 0        | 0              | 0       | 11   | 0                        | 0         | 0     | 0                    | 0        |
| L33        | 26              | 0               | 0              | 14             | 14               | 0                | 0         | 0          | 0            | 0             | 0        | 0              | 0       | 0    | 0                        | 0         | 0     | 0                    | 0        |
| L33        | 32              | 0               | 0              | 2              | 2                | 0                | 0         | 0          | 4            | 0             | 0        | 0              | 0       | 0    | 0                        | 0         | 0     | 0                    | 2        |
| L48        | 0               | 0               | 0              | 0              | 0                | 0                | 0         | 0          | 0            | 8             | 0        | 0              | 0       | 32   | 0                        | 0         | 0     | 0                    | 0        |
| L39        | 0               | 4               | 0              | 31             | 31               | 0                | 0         | 0          | 0            | 0             | 0        | 0              | 0       | 0    | 0                        | 0         | 0     | 0                    | 5        |
| L56        | 26              | 0               | 2              | 12             | 12               | 0                | 0         | 0          | 0            | 0             | 0        | 0              | 0       | 0    | 0                        | 0         | 0     | 0                    | 0        |
| L39        | 0               | 16              | 15             | 0              | 0                | 0                | 0         | 0          | 0            | 0             | 0        | 0              | 0       | 8    | 0                        | 1         | 0     | 0                    | 0        |
| L58        | 0               | 3               | 0              | 0              | 0                | 37               | 0         | 0          | 0            | 0             | 0        | 0              | 0       | 0    | 0                        | 0         | 0     | 0                    | 0        |
| L58        | 1               | 0               | 5              | 0              | 0                | 34               | 0         | 0          | 0            | 0             | 0        | 0              | 0       | 0    | 0                        | 0         | 0     | 0                    | 0        |
| L39        | 0               | 28              | 0              | 0              | 0                | 0                | 0         | 0          | 0            | 0             | 0        | 0              | 0       | 12   | 0                        | 0         | 0     | 0                    | 0        |
| L86        | 0               | 0               | 0              | 0              | 0                | 0                | 0         | 0          | 0            | 0             | 0        | 0              | 0       | 0    | 0                        | 0         | 40    | 0                    | 0        |
| L39        | 0               | 0               | 0              | 4              | 4                | 0                | 0         | 0          | 0            | 0             | 0        | 0              | 0       | 33   | 0                        | 0         | 0     | 0                    | 3        |
| L37        | 0               | 0               | 2              | 10             | 10               | 28               | 0         | 0          | 0            | 0             | 0        | 0              | 0       | 0    | 0                        | 0         | 0     | 0                    | 0        |
| L39        | 0               | 36              | 0              | 0              | 0                | 0                | 0         | 0          | 0            | 0             | 0        | 0              | 0       | 4    | 0                        | 0         | 0     | 0                    | 0        |
| L37        | 0               | 0               | 2              | 38             | 38               | 0                | 0         | 0          | 0            | 0             | 0        | 0              | 0       | 0    | 0                        | 0         | 0     | 0                    | 0        |
| L39        | 0               | 0               | 0              | 0              | 0                | 0                | 0         | 0          | 0            | 0             | 0        | 0              | 0       | 40   | 0                        | 0         | 0     | 0                    | 0        |
| L35        | 0               | 0               | 0              | 0              | 0                | 0                | 7         | 0          | 0            | 2             | 0        | 0              | 0       | 0    | 0                        | 0         | 0     | 0                    | 0        |
| L18        | 34              | 0               | 0              | 4              | 4                | 0                | 0         | 0          | 0            | 0             | 0        | 0              | 0       | 0    | 0                        | 0         | 0     | 0                    | 2        |
| L39        | 0               | 10              | 0              | 0              | 0                | 0                | 0         | 0          | 0            | 7             | 0        | 0              | 0       | 0    | 23                       | 0         | 0     | 0                    | 0        |
| L34        | 20              | 0               | 0              | 0              | 0                | 0                | 0         | 0          | 0            | 5             | 0        | 0              | 0       | 15   | 0                        | 0         | 0     | 0                    | 0        |
| L39        | 0               | 40              | 0              | 0              | 0                | 0                | 0         | 0          | 0            | 0             | 0        | 0              | 0       | 0    | 0                        | 0         | 0     | 0                    | 0        |
| L34        | 0               | 0               | 0              | 0              | 0                | 0                | 0         | 0          | 0            | 0             | 0        | 0              | 0       | 40   | 0                        | 0         | 0     | 0                    | 0        |
| L39        | 0               | 0               | 0              | 0              | 0                | 8                | 0         | 0          | 0            | 0             | 0        | 0              | 0       | 32   | 0                        | 0         | 0     | 0                    | 0        |
| L56        | 0               | 0               | 0              | 40             | 40               | 0                | 0         | 0          | 0            | 0             | 0        | 0              | 0       | 0    | 0                        | 0         | 0     | 0                    | 0        |
| L16        | 0               | 0               | 0              | 0              | 0                | 0                | 0         | 0          | 0            | 0             | 0        | 0              | 0       | 0    | 0                        | 0         | 0     | 0                    | 0        |
| L56        | 0               | 0               | 0              | 21             | 21               | 7                | 0         | 0          | 0            | 0             | 0        | 0              | 0       | 12   | 0                        | 0         | 0     | 0                    | 0        |
| L56        | 0               | 0               | 0              | 18             | 18               | 0                | 22        | 0          | 0            | 0             | 0        | 0              | 0       | 0    | 0                        | 0         | 0     | 0                    | 0        |
| L5         | 31              | 0               | 0              | 0              | 0                | 0                | 0         | 0          | 0            | 0             | 0        | 0              | 12      | 0    | 9                        | 0         | 0     | 0                    | 0        |
| L47        | 0               | 0               | 0              | 28             | 28               | 0                | 0         | 0          | 0            | 0             | 0        | 0              | 12      | 0    | 0                        | 0         | 0     | 0                    | 0        |
| L5         | 0               | 0               | 0              | 0              | 0                | 0                | 0         | 0          | 0            | 0             | 0        | 0              | 0       | 40   | 0                        | 0         | 0     | 0                    | 0        |
| L47        | 27              | 0               | 0              | 2              | 2                | 0                | 0         | 0          | 0            | 0             | 0        | 0              | 0       | 11   | 0                        | 0         | 0     | 0                    | 0        |
| L5         | 40              | 0               | 0              | 0              | 0                | 0                | 0         | 0          | 0            | 0             | 0        | 0              | 0       | 0    | 0                        | 0         | 0     | 0                    | 0        |
| L47        | 0               | 0               | 0              | 15             | 15               | 0                | 25        | 0          | 0            | 0             | 0        | 0              | 0       | 0    | 0                        | 0         | 0     | 0                    | 0        |
| L5         | 40              | 0               | 0              | 0              | 0                | 0                | 0         | 0          | 0            | 0             | 0        | 0              | 0       | 0    | 0                        | 0         | 0     | 0                    | 0        |
| L47        | 0               | 0               | 0              | 20             | 20               | 11               | 0         | 0          | 0            | 0             | 0        | 0              | 0       | 9    | 0                        | 0         | 0     | 0                    | 0        |
| L5         | 0               | 0               | 0              | 0              | 0                | 0                | 0         | 0          | 0            | 0             | 0        | 0              | 0       | 40   | 0                        | 0         | 0     | 0                    | 0        |
| L47        | 0               | 0               | 0              | 6              | 6                | 0                | 0         | 0          | 0            | 0             | 0        | 0              | 0       | 34   | 0                        | 0         | 0     | 0                    | 0        |
| L26        | 0               | 0               | 10             | 29             | 29               | 0                | 0         | 0          | 0            | 0             | 0        | 1              | 0       | 0    | 0                        | 0         | 0     | 0                    | 0        |
| L56        | 0               | 0               | 0              | 0              | 0                | 17               | 0         | 0          | 0            | 0             | 0        | 0              | 0       | 23   | 0                        | 0         | 0     | 0                    | 0        |
| L3         | 40              | 0               | 0              | 0              | 0                | 0                | 0         | 0          | 0            | 0             | 0        | 0              | 0       | 0    | 0                        | 0         | 0     | 0                    | 0        |
| L56        | 0               | 0               | 0              | 20             | 20               | 15               | 0         | 0          | 0            | 0             | 0        | 0              | 0       | 5    | 0                        | 0         | 0     | 0                    | 0        |
| L37        | 36              | 0               | 2              | 2              | 2                | 0                | 0         | 0          | 0            | 0             | 0        | 0              | 0       | 0    | 0                        | 0         | 0     | 0                    | 0        |
| L56        | 0               | 0               | 0              | 25             | 25               | 5                | 10        | 0          | 0            | 0             | 0        | 0              | 0       | 0    | 0                        | 0         | 0     | 0                    | 0        |
| L78        | 0               | 0               | 28             | 12             | 12               | 0                | 0         | 0          | 0            | 0             | 0        | 0              | 0       | 0    | 0                        | 0         | 0     | 0                    | 0        |
| L56        | 0               | 0               | 0              | 3              | 3                | 0                | 5         | 0          | 0            | 0             | 0        | 0              | 0       | 32   | 0                        | 0         | 0     | 0                    | 0        |
| L33        | 0               | 6               | 0              | 12             | 12               | 0                | 2         | 0          | 11           | 0             | 0        | 0              | 0       | 9    | 0                        | 0         | 0     | 0                    | 0        |
| L47        | 0               | 0               | 0              | 21             | 21               | 0                | 0         | 0          | 0            | 0             | 0        | 0              | 0       | 19   | 0                        | 0         | 0     | 0                    | 0        |
| L50        | 0               | 0               | 21             | 0              | 0                | 0                | 4         | 0          | 0            | 0             | 0        | 0              | 0       | 15   | 0                        | 0         | 0     | 0                    | 0        |
| L19        | 0               | 21              | 0              | 3              | 3                | 0                | 2         | 2          | 0            | 0             | 3        | 0              | 0       | 7    | 0                        | 0         | 0     | 0                    | 2        |
| L56        | 0               | 0               | 0              | 27             | 27               | 0                | 0         | 0          | 0            | 0             | 0        | 0              | 0       | 13   | 0                        | 0         | 0     | 0                    | 0        |
| L56        | 0               | 0               | 0              | 40             | 40               | 0                | 0         | 0          | 0            | 0             | 0        | 0              | 0       | 0    | 0                        | 0         | 0     | 0                    | 0        |
| L71        | 0               | 0               | 0              | 0              | 0                | 0                | 0         | 0          | 0            | 0             | 0        | 0              | 0       | 40   | 0                        | 0         | 0     | 0                    | 0        |
| L71        | 0               | 0               | 0              | 0              | 0                | 0                | 30        | 0          | 0            | 0             | 0        | 0              | 0       | 10   | 0                        | 0         | 0     | 0                    | 0        |
| L58        | 0               | 0               | 12             | 13             | 13               | 0                | 9         | 0          | 0            | 0             | 0        | 0              | 0       | 6    | 0                        | 0         | 0     | 0                    | 0        |
| L71        | 0               | 0               | 0              | 0              | 0                | 0                | 0         | 0          | 0            | 0             | 0        | 0              | 0       | 40   | 0                        | 0         | 0     | 0                    | 0        |
| L50        | 0               | 40              | 0              | 0              | 0                | 0                | 0         | 0          | 0            | 0             | 0        | 0              | 0       | 0    | 0                        | 0         | 0     | 0                    | 0        |
| L71        | 0               | 0               | 0              | 0              | 0                | 0                | 40        | 0          | 0            | 0             | 0        | 0              | 0       | 0    | 0                        | 0         | 0     | 0                    | 0        |
| L71        | 0               | 0               | 0              | 0              | 0                | 0                | 0         | 0          | 0            | 0             | 0        | 0              | 0       | 40   | 0                        | 0         | 0     | 0                    | 0        |
| L82        | 0               | 40              | 0              | 0              | 0                | 0                | 0         | 0          | 0            | 0             | 0        | 0              | 0       | 0    | 0                        | 0         | 0     | 0                    | 0        |
| L82        | 0               | 0               | 0              | 0              | 0                | 40               | 0         | 0          | 0            | 0             | 0        | 0              | 0       | 0    | 0                        | 0         | 0     | 0                    | 0        |
| L82        | 0               | 0               | 0              | 0              | 0                | 0                | 0         | 0          | 0            | 0             | 0        | 0              | 0       | 40   | 0                        | 0         | 0     | 0                    | 0        |
| L13        | 25              | 0               | 0              | 3              | 3                | 0                | 12        | 0          | 0            | 0             | 0        | 0              | 0       | 0    | 0                        | 0         | 0     | 0                    | 0        |
| L82        | 0               | 0               | 0              | 0              | 0                | 0                | 0         | 0          | 0            | 0             | 0        | 0              | 0       | 40   | 0                        | 0         | 0     | 0                    | 0        |
| L33        | 9               | 0               | 23             | 2              | 2                | 0                | 0         | 6          | 0            | 0             | 0        | 0              | 0       | 0    | 0                        | 0         | 0     | 0                    | 0        |
| L71        | 0               | 0               | 0              | 0              | 0                | 0                | 0         | 0          | 0            | 0             | 0        | 0              | 0       | 40   | 0                        | 0         | 0     | 0                    | 0        |
| L39        | 0               | 0               | 0              |                |                  |                  |           |            |              |               |          |                |         |      |                          |           |       |                      |          |

| Species ID | micro-crustacea | macro-crustacea | micro-bivalvia | macro-bivalvia | micro-gastropoda | macro-gastropoda | Brachyura | Polychaeta | Foraminifera | Echinodermata | Copepoda | gnathid Isopod | Anomura | fish | amorphous organic matter | Black AOM | algae | coral organic matter | sediment |
|------------|-----------------|-----------------|----------------|----------------|------------------|------------------|-----------|------------|--------------|---------------|----------|----------------|---------|------|--------------------------|-----------|-------|----------------------|----------|
| L13        | 2               | 0               | 0              | 0              | 0                | 0                | 0         | 4          | 0            | 0             | 34       | 0              | 0       | 0    | 0                        | 0         | 0     | 0                    | 0        |
| L13        | 34              | 0               | 0              | 3              | 3                | 0                | 0         | 0          | 0            | 3             | 0        | 0              | 0       | 0    | 0                        | 0         | 0     | 0                    | 0        |
| L13        | 33              | 5               | 0              | 2              | 2                | 0                | 0         | 0          | 0            | 0             | 0        | 0              | 0       | 0    | 0                        | 0         | 0     | 0                    | 0        |
| L13        | 0               | 35              | 0              | 5              | 5                | 0                | 0         | 0          | 0            | 0             | 0        | 0              | 0       | 0    | 0                        | 0         | 0     | 0                    | 0        |
| L55        | 30              | 0               | 0              | 2              | 2                | 0                | 0         | 0          | 0            | 8             | 0        | 0              | 0       | 0    | 0                        | 0         | 0     | 0                    | 0        |
| L13        | 40              | 0               | 0              | 0              | 0                | 0                | 0         | 0          | 0            | 0             | 0        | 0              | 0       | 0    | 0                        | 0         | 0     | 0                    | 0        |
| L13        | 0               | 0               | 0              | 3              | 3                | 0                | 36        | 0          | 1            | 0             | 0        | 0              | 0       | 0    | 0                        | 0         | 0     | 0                    | 0        |
| L86        | 0               | 0               | 0              | 0              | 0                | 0                | 0         | 0          | 0            | 0             | 0        | 0              | 0       | 0    | 0                        | 0         | 0     | 40                   | 0        |
| L13        | 23              | 0               | 0              | 2              | 2                | 0                | 2         | 0          | 0            | 13            | 0        | 0              | 0       | 0    | 0                        | 0         | 0     | 0                    | 0        |
| L14        | 0               | 3               | 0              | 2              | 2                | 0                | 0         | 7          | 0            | 0             | 28       | 0              | 0       | 0    | 0                        | 0         | 0     | 0                    | 0        |
| L24        | 0               | 0               | 0              | 12             | 12               | 0                | 0         | 10         | 3            | 0             | 0        | 0              | 0       | 0    | 15                       | 0         | 0     | 0                    | 0        |
| L13        | 0               | 0               | 0              | 0              | 0                | 0                | 29        | 0          | 0            | 11            | 0        | 0              | 0       | 0    | 0                        | 0         | 0     | 0                    | 0        |
| L13        | 19              | 0               | 0              | 0              | 0                | 0                | 18        | 3          | 0            | 0             | 0        | 0              | 0       | 0    | 0                        | 0         | 0     | 0                    | 0        |
| L13        | 0               | 40              | 0              | 0              | 0                | 0                | 0         | 0          | 0            | 0             | 0        | 0              | 0       | 0    | 0                        | 0         | 0     | 0                    | 0        |
| L3         | 40              | 0               | 0              | 0              | 0                | 0                | 0         | 0          | 0            | 0             | 0        | 0              | 0       | 0    | 0                        | 0         | 0     | 0                    | 0        |
| L13        | 0               | 38              | 0              | 0              | 0                | 2                | 0         | 0          | 0            | 0             | 0        | 0              | 0       | 0    | 0                        | 0         | 0     | 0                    | 0        |
| L39        | 4               | 0               | 0              | 0              | 0                | 0                | 0         | 0          | 0            | 0             | 0        | 0              | 0       | 0    | 28                       | 0         | 0     | 0                    | 8        |
| L13        | 40              | 0               | 0              | 0              | 0                | 0                | 0         | 0          | 0            | 0             | 0        | 0              | 0       | 0    | 0                        | 0         | 0     | 0                    | 0        |
| L13        | 0               | 0               | 0              | 4              | 4                | 0                | 17        | 0          | 0            | 0             | 0        | 0              | 19      | 0    | 0                        | 0         | 0     | 0                    | 0        |
| L39        | 2               | 0               | 32             | 2              | 2                | 0                | 0         | 0          | 0            | 0             | 0        | 0              | 0       | 0    | 0                        | 0         | 0     | 0                    | 4        |
| L13        | 0               | 5               | 0              | 0              | 0                | 1                | 34        | 0          | 0            | 0             | 0        | 0              | 0       | 0    | 0                        | 0         | 0     | 0                    | 0        |
| L58        | 0               | 0               | 25             | 0              | 0                | 0                | 0         | 0          | 0            | 15            | 0        | 0              | 0       | 0    | 0                        | 0         | 0     | 0                    | 0        |
| L56        | 19              | 0               | 0              | 5              | 5                | 0                | 0         | 0          | 0            | 9             | 0        | 0              | 0       | 0    | 7                        | 0         | 0     | 0                    | 0        |
| L9         | 7               | 0               | 7              | 9              | 9                | 0                | 0         | 0          | 1            | 0             | 6        | 0              | 0       | 0    | 0                        | 0         | 0     | 0                    | 10       |
| L62        | 0               | 0               | 0              | 0              | 0                | 0                | 0         | 0          | 0            | 40            | 0        | 0              | 0       | 0    | 0                        | 0         | 0     | 0                    | 0        |
| L9         | 16              | 0               | 0              | 0              | 0                | 0                | 0         | 13         | 1            | 0             | 0        | 0              | 0       | 0    | 0                        | 0         | 0     | 0                    | 10       |
| L62        | 0               | 19              | 0              | 0              | 0                | 0                | 0         | 0          | 0            | 0             | 0        | 0              | 0       | 21   | 0                        | 0         | 0     | 0                    | 0        |
| L19        | 6               | 0               | 0              | 0              | 0                | 0                | 0         | 3          | 1            | 0             | 20       | 0              | 0       | 0    | 0                        | 0         | 0     | 0                    | 10       |
| L55        | 0               | 0               | 0              | 0              | 0                | 0                | 17        | 0          | 0            | 0             | 0        | 0              | 0       | 0    | 0                        | 0         | 0     | 0                    | 0        |
| L19        | 5               | 0               | 3              | 0              | 0                | 0                | 0         | 3          | 0            | 0             | 11       | 0              | 0       | 0    | 0                        | 0         | 0     | 0                    | 18       |
| L57        | 0               | 0               | 0              | 0              | 0                | 0                | 0         | 0          | 0            | 40            | 0        | 0              | 0       | 0    | 0                        | 0         | 0     | 0                    | 0        |
| L57        | 0               | 0               | 0              | 0              | 0                | 0                | 30        | 0          | 0            | 0             | 0        | 0              | 0       | 0    | 0                        | 0         | 0     | 0                    | 0        |
| L65        | 0               | 0               | 0              | 3              | 3                | 0                | 37        | 0          | 0            | 0             | 0        | 0              | 0       | 0    | 0                        | 0         | 0     | 0                    | 0        |
| L57        | 0               | 0               | 0              | 0              | 0                | 23               | 0         | 0          | 0            | 17            | 0        | 0              | 0       | 0    | 0                        | 0         | 0     | 0                    | 0        |
| L58        | 0               | 0               | 0              | 0              | 0                | 0                | 40        | 0          | 0            | 0             | 0        | 0              | 0       | 0    | 0                        | 0         | 0     | 0                    | 0        |
| L73        | 0               | 0               | 0              | 32             | 32               | 0                | 0         | 0          | 0            | 0             | 0        | 0              | 0       | 0    | 6                        | 0         | 0     | 0                    | 0        |
| L45        | 0               | 0               | 0              | 3              | 3                | 0                | 0         | 0          | 0            | 4             | 0        | 0              | 0       | 0    | 0                        | 0         | 0     | 0                    | 26       |
| L73        | 0               | 0               | 0              | 0              | 0                | 0                | 0         | 0          | 0            | 0             | 0        | 0              | 0       | 0    | 0                        | 0         | 0     | 0                    | 0        |
| L3         | 39              | 0               | 0              | 0              | 0                | 0                | 0         | 0          | 1            | 0             | 0        | 0              | 0       | 0    | 0                        | 0         | 0     | 0                    | 0        |
| L73        | 0               | 0               | 0              | 23             | 23               | 8                | 0         | 0          | 0            | 0             | 0        | 0              | 0       | 0    | 9                        | 0         | 0     | 0                    | 0        |
| L54        | 0               | 40              | 0              | 0              | 0                | 0                | 0         | 0          | 0            | 0             | 0        | 0              | 0       | 0    | 0                        | 0         | 0     | 0                    | 0        |
| L62        | 0               | 0               | 0              | 0              | 0                | 0                | 7         | 0          | 0            | 0             | 0        | 0              | 0       | 0    | 33                       | 0         | 0     | 0                    | 0        |
| L73        | 0               | 0               | 0              | 0              | 0                | 14               | 0         | 0          | 0            | 0             | 0        | 0              | 26      | 0    | 0                        | 0         | 0     | 0                    | 0        |
| L56        | 0               | 33              | 0              | 7              | 7                | 0                | 0         | 0          | 0            | 0             | 0        | 0              | 0       | 0    | 0                        | 0         | 0     | 0                    | 0        |
| L73        | 0               | 0               | 0              | 9              | 9                | 0                | 0         | 0          | 0            | 0             | 0        | 0              | 31      | 0    | 0                        | 0         | 0     | 0                    | 0        |
| L23        | 40              | 0               | 0              | 0              | 0                | 0                | 0         | 0          | 0            | 0             | 0        | 0              | 0       | 0    | 0                        | 0         | 0     | 0                    | 0        |
| L42        | 0               | 0               | 0              | 20             | 20               | 0                | 0         | 0          | 0            | 0             | 0        | 0              | 20      | 0    | 0                        | 0         | 0     | 0                    | 0        |
| L23        | 40              | 0               | 0              | 0              | 0                | 0                | 0         | 0          | 0            | 0             | 0        | 0              | 0       | 0    | 0                        | 0         | 0     | 0                    | 0        |
| L65        | 0               | 0               | 5              | 0              | 0                | 0                | 0         | 0          | 0            | 35            | 0        | 0              | 0       | 0    | 0                        | 0         | 0     | 0                    | 0        |
| L30        | 40              | 0               | 0              | 0              | 0                | 0                | 0         | 0          | 0            | 0             | 0        | 0              | 0       | 0    | 0                        | 0         | 0     | 0                    | 0        |
| L30        | 0               | 0               | 0              | 0              | 0                | 0                | 0         | 0          | 0            | 0             | 0        | 0              | 0       | 0    | 40                       | 0         | 0     | 0                    | 0        |
| L54        | 22              | 0               | 0              | 0              | 0                | 0                | 18        | 0          | 0            | 0             | 0        | 0              | 0       | 0    | 0                        | 0         | 0     | 0                    | 0        |
| L30        | 40              | 0               | 0              | 0              | 0                | 0                | 0         | 0          | 0            | 0             | 0        | 0              | 0       | 0    | 0                        | 0         | 0     | 0                    | 0        |
| L86        | 0               | 0               | 0              | 0              | 0                | 0                | 0         | 0          | 0            | 0             | 0        | 0              | 0       | 0    | 0                        | 0         | 0     | 40                   | 0        |
| L30        | 0               | 0               | 0              | 0              | 0                | 0                | 0         | 0          | 0            | 0             | 0        | 0              | 0       | 0    | 40                       | 0         | 0     | 0                    | 0        |
| L86        | 0               | 0               | 0              | 0              | 0                | 0                | 0         | 0          | 0            | 0             | 0        | 0              | 0       | 0    | 0                        | 0         | 0     | 40                   | 0        |
| L5         | 40              | 0               | 0              | 0              | 0                | 0                | 0         | 0          | 0            | 0             | 0        | 0              | 0       | 0    | 0                        | 0         | 0     | 0                    | 0        |
| L84        | 0               | 0               | 7              | 29             | 29               | 0                | 0         | 0          | 0            | 0             | 0        | 0              | 0       | 0    | 0                        | 0         | 4     | 0                    | 0        |
| L5         | 0               | 0               | 0              | 0              | 0                | 0                | 0         | 0          | 0            | 0             | 0        | 0              | 0       | 0    | 40                       | 0         | 0     | 0                    | 0        |
| L84        | 0               | 0               | 11             | 29             | 29               | 0                | 0         | 0          | 0            | 0             | 0        | 0              | 0       | 0    | 0                        | 0         | 0     | 0                    | 0        |
| L89        | 0               | 0               | 0              | 0              | 0                | 0                | 0         | 0          | 7            | 0             | 0        | 0              | 0       | 0    | 18                       | 0         | 0     | 0                    | 15       |
| L50        | 0               | 0               | 8              | 1              | 1                | 0                | 0         | 0          | 0            | 0             | 0        | 0              | 0       | 0    | 0                        | 0         | 0     | 0                    | 0        |
| L78        | 0               | 0               | 0              | 36             | 36               | 0                | 0         | 0          | 0            | 0             | 0        | 0              | 0       | 0    | 0                        | 0         | 0     | 0                    | 0        |
| L73        | 0               | 4               | 0              | 0              | 0                | 23               | 0         | 0          | 0            | 0             | 0        | 0              | 0       | 0    | 0                        | 0         | 0     | 0                    | 0        |
| L68        | 0               | 0               | 0              | 0              | 0                | 0                | 0         | 0          | 3            | 0             | 0        | 0              | 0       | 0    | 29                       | 0         | 0     | 0                    | 8        |
| L68        | 0               | 0               | 0              | 0              | 0                | 0                | 0         | 0          | 0            | 0             | 0        | 0              | 0       | 0    | 33                       | 0         | 0     | 0                    | 7        |
| L59        | 0               | 40              | 0              | 0              | 0                | 0                | 0         | 0          | 0            | 0             | 0        | 0              | 0       | 0    | 0                        | 0         | 0     | 0                    | 0        |
| L68        | 0               | 0               | 0              | 0              | 0                | 0                | 0         | 0          | 0            | 0             | 0        | 0              | 0       | 0    | 40                       | 0         | 0     | 0                    | 0        |
| L68        | 0               | 0               | 0              | 3              | 3                | 0                | 0         | 0          | 7            | 0             | 0        | 0              | 0       | 0    | 17                       | 0         | 0     | 0                    | 13       |
| L48        | 0               | 0               | 0              | 0              | 0                | 0                | 0         | 0          | 0            | 0             | 0        | 0              | 0       | 40   | 0                        | 0         | 0     | 0                    | 0        |
| L88        | 0               | 0               | 0              | 3              | 3                | 0                | 0         | 0          | 37           | 0             | 0        | 0              | 0       | 0    | 0                        | 0         | 0     | 0                    | 0        |
| L14        | 35              | 1               | 0              | 0              | 0                | 1                | 0         | 0          | 0            | 3             | 0        | 0              | 0       | 0    | 0                        | 0         | 0     | 0                    | 0        |
| L55        | 0               | 0               | 0              | 37             | 37               | 0                | 0         | 0          | 0            | 0             | 0        | 0              | 3       | 0    | 0                        | 0         | 0     | 0                    | 0        |
| L50        | 0               | 0               | 0              | 0              | 0                | 0                | 32        | 0          | 0            | 0             | 0        | 0              | 0       | 0    | 0                        | 0         | 0     | 0                    | 0        |
| L47        | 0               | 28              | 0              | 9              | 9                | 0                | 0         | 0          | 0            | 3             | 0        | 0              | 0       | 0    | 0                        | 0         | 0     | 0                    | 0        |
| L55        | 0               | 0               | 0              | 16             | 16               | 0                | 0         | 0          | 0            | 0             | 0        | 0              | 0       | 0    | 24                       | 0         | 0     | 0                    | 0        |
| L19        | 37              | 0               | 0              | 0              | 0                | 0                | 0         | 3          | 0            | 0             | 0        | 0              | 0       | 0    | 0                        | 0         | 0     | 0                    | 0        |
| L26        | 0               | 0               | 9              | 31             | 31               | 0                | 0         | 0          | 0            | 0             | 0        | 0              | 0       | 0    | 0                        | 0         | 0     | 0                    | 0        |
| L19        | 40              | 0               | 0              | 0              | 0                | 0                | 0         | 0          | 0            | 0             | 0        | 0              | 0       | 0    | 0                        | 0         | 0     | 0                    | 0        |
| L19        | 0               | 0               | 0              | 0              | 0                | 0                | 40        | 0          | 0            | 0             | 0        | 0              | 0       | 0    | 0                        | 0         | 0     | 0                    | 0        |
| L47        | 0               | 0               | 0              | 40             | 40               | 0                | 0         | 0          | 0            | 0             | 0        | 0              | 0       | 0    | 0                        | 0         | 0     | 0                    | 0        |
| L84        | 0               | 0               | 0              | 7              | 7                | 26               | 0         | 0          | 0            | 0             | 0        | 7              | 0       | 0    | 0                        | 0         | 0     | 0                    | 0        |
| L59        | 0               | 0               | 0              | 0              | 0                | 0                | 28        | 0          | 0            | 12            | 0        | 0              | 0       | 0    | 0                        | 0         | 0     | 0                    | 0        |
| L86        | 0               | 0               | 0              | 0              | 0                | 0                | 0         | 0          | 0            | 0             | 0        | 0              | 0       | 0    | 0                        | 0         | 0     | 40                   | 0        |
| L59        | 0               | 0               | 0              | 0              | 0                | 0                | 40        | 0          | 0            | 0             | 0        | 0              | 0       | 0    | 0                        | 0         | 0     | 0                    | 0        |
| L59        | 0               | 0               | 0              | 0              | 0                | 0                | 40        | 0          | 0            | 0             | 0        | 0              | 0       | 0    | 0                        | 0         | 0     | 0                    | 0        |
| L39        | 0               | 0               | 0              | 0              | 0                | 0                | 21        | 2          | 0            | 0             | 0        | 0              | 0       | 0    | 0                        | 0         | 0     | 0                    | 0        |
| L59        | 0               | 0               | 0              | 0              | 0                | 0                | 40        | 0          | 0            | 0             | 0        | 0              | 0       | 0    | 0                        | 0         | 0     | 0                    | 0        |
| L39        | 0               | 0               | 0              | 12             | 12               | 0                | 0         | 0          | 0            | 0             | 0        | 0              | 0       | 0    | 28                       | 0         | 0     | 0                    | 0        |
| L57        | 37              | 0               | 3              | 0              | 0                | 0                | 0         | 0          | 0            | 0             | 0        | 0              | 0       | 0    | 0                        | 0         | 0     | 0                    | 0        |
| L14        | 0               | 2               | 0              | 0              | 0                | 0                | 0         | 5          | 0            | 0             | 24       | 0              | 0       | 0    | 9                        | 0         | 0     | 0                    | 0        |
| L14        | 38              | 2               | 0              | 0              | 0                | 0                | 0         | 0          | 0            | 0             | 0        | 0              | 0       | 0    | 0                        | 0         | 0     | 0                    | 0        |
| L9         | 0               | 0               | 0              | 0              | 0                | 0                | 34        | 0          | 0            | 0             | 0        | 0              | 0       | 0    | 0                        | 0         | 0     | 0                    | 6        |
| L14        | 40              | 0               | 0              | 0              | 0                | 0                | 0         | 0          | 0            | 0             | 0        | 0              | 0       | 0    | 0                        | 0         | 0     | 0                    | 0        |
| L14        | 37              | 0               | 0              | 0              | 0                | 0                | 0         | 0          | 0            | 3             | 0        | 0              | 0       | 0    | 0                        | 0         | 0     | 0                    | 0        |
| L84        | 0               | 0               | 0              | 0              | 0                | 40               | 0</       |            |              |               |          |                |         |      |                          |           |       |                      |          |

| Species ID | micro-crustacea | macro-crustacea | micro-bivalvia | macro-bivalvia | micro-gastropoda | macro-gastropoda | Brachyura | Polychaeta | Foraminifera | Echinodermata | Copepoda | gnathid Isopod | Anomura | fish | amorphous organic matter | Black AOM | algae | coral organic matter | sediment |
|------------|-----------------|-----------------|----------------|----------------|------------------|------------------|-----------|------------|--------------|---------------|----------|----------------|---------|------|--------------------------|-----------|-------|----------------------|----------|
| L41        | 0               | 0               | 0              | 0              | 0                | 0                | 0         | 0          | 0            | 0             | 0        | 0              | 0       | 0    | 40                       | 0         | 0     | 0                    | 0        |
| L48        | 0               | 0               | 0              | 0              | 0                | 0                | 0         | 0          | 0            | 0             | 0        | 0              | 0       | 0    | 40                       | 0         | 0     | 0                    | 0        |
| L41        | 0               | 0               | 0              | 0              | 0                | 0                | 39        | 0          | 0            | 0             | 0        | 0              | 0       | 0    | 0                        | 0         | 0     | 0                    | 0        |
| L70        | 3               | 0               | 14             | 0              | 0                | 0                | 0         | 0          | 0            | 5             | 0        | 0              | 0       | 0    | 0                        | 0         | 0     | 0                    | 18       |
| L41        | 0               | 0               | 0              | 0              | 0                | 0                | 40        | 0          | 0            | 0             | 0        | 0              | 0       | 0    | 0                        | 0         | 0     | 0                    | 0        |
| L55        | 0               | 0               | 0              | 40             | 40               | 0                | 0         | 0          | 0            | 0             | 0        | 0              | 0       | 0    | 0                        | 0         | 0     | 0                    | 0        |
| L41        | 0               | 0               | 0              | 0              | 0                | 0                | 0         | 0          | 0            | 38            | 0        | 0              | 0       | 0    | 0                        | 0         | 0     | 0                    | 0        |
| L57        | 0               | 0               | 0              | 0              | 0                | 0                | 29        | 0          | 0            | 11            | 0        | 0              | 0       | 0    | 0                        | 0         | 0     | 0                    | 0        |
| L4         | 40              | 0               | 0              | 0              | 0                | 0                | 0         | 0          | 0            | 0             | 0        | 0              | 0       | 0    | 0                        | 0         | 0     | 0                    | 0        |
| L4         | 40              | 0               | 0              | 0              | 0                | 0                | 0         | 0          | 0            | 0             | 0        | 0              | 0       | 0    | 0                        | 0         | 0     | 0                    | 0        |
| L3         | 40              | 0               | 0              | 0              | 0                | 0                | 0         | 0          | 0            | 0             | 0        | 0              | 0       | 0    | 0                        | 0         | 0     | 0                    | 0        |
| L4         | 36              | 0               | 4              | 0              | 0                | 0                | 0         | 0          | 0            | 0             | 0        | 0              | 0       | 0    | 0                        | 0         | 0     | 0                    | 0        |
| L50        | 0               | 0               | 0              | 0              | 0                | 0                | 40        | 0          | 0            | 0             | 0        | 0              | 0       | 0    | 0                        | 0         | 0     | 0                    | 0        |
| L4         | 40              | 0               | 0              | 0              | 0                | 0                | 0         | 0          | 0            | 0             | 0        | 0              | 0       | 0    | 0                        | 0         | 0     | 0                    | 0        |
| L50        | 0               | 0               | 0              | 0              | 0                | 0                | 0         | 0          | 0            | 0             | 0        | 0              | 0       | 40   | 0                        | 0         | 0     | 0                    | 0        |
| L4         | 12              | 0               | 0              | 0              | 0                | 0                | 0         | 0          | 0            | 28            | 0        | 0              | 0       | 0    | 0                        | 0         | 0     | 0                    | 0        |
| L50        | 40              | 0               | 0              | 0              | 0                | 0                | 0         | 0          | 0            | 0             | 0        | 0              | 0       | 0    | 0                        | 0         | 0     | 0                    | 0        |
| L55        | 9               | 0               | 0              | 31             | 31               | 0                | 0         | 0          | 0            | 0             | 0        | 0              | 0       | 0    | 0                        | 0         | 0     | 0                    | 0        |
| L4         | 39              | 0               | 0              | 0              | 0                | 0                | 0         | 1          | 0            | 0             | 0        | 0              | 0       | 0    | 0                        | 0         | 0     | 0                    | 0        |
| L4         | 40              | 0               | 0              | 0              | 0                | 0                | 0         | 0          | 0            | 0             | 0        | 0              | 0       | 0    | 0                        | 0         | 0     | 0                    | 0        |
| L42        | 27              | 0               | 0              | 13             | 13               | 0                | 0         | 0          | 0            | 0             | 0        | 0              | 0       | 0    | 0                        | 0         | 0     | 0                    | 0        |
| L4         | 40              | 0               | 0              | 0              | 0                | 0                | 0         | 0          | 0            | 0             | 0        | 0              | 0       | 0    | 0                        | 0         | 0     | 0                    | 0        |
| L11        | 0               | 0               | 0              | 2              | 2                | 0                | 0         | 4          | 0            | 8             | 0        | 0              | 0       | 0    | 0                        | 0         | 0     | 0                    | 26       |
| L34        | 31              | 0               | 0              | 0              | 0                | 0                | 0         | 0          | 0            | 3             | 0        | 0              | 0       | 6    | 0                        | 0         | 0     | 0                    | 0        |
| L11        | 0               | 0               | 0              | 0              | 0                | 0                | 0         | 0          | 0            | 0             | 0        | 0              | 0       | 0    | 40                       | 0         | 0     | 0                    | 0        |
| L48        | 4               | 0               | 0              | 0              | 0                | 0                | 0         | 0          | 0            | 0             | 0        | 0              | 0       | 36   | 0                        | 0         | 0     | 0                    | 0        |
| L48        | 0               | 0               | 0              | 0              | 0                | 0                | 0         | 0          | 0            | 0             | 0        | 0              | 0       | 40   | 0                        | 0         | 0     | 0                    | 0        |
| L48        | 0               | 0               | 0              | 1              | 1                | 0                | 0         | 0          | 0            | 0             | 0        | 0              | 0       | 39   | 0                        | 0         | 0     | 0                    | 0        |
| L14        | 0               | 1               | 0              | 0              | 0                | 0                | 0         | 7          | 0            | 0             | 32       | 0              | 0       | 0    | 0                        | 0         | 0     | 0                    | 0        |
| L47        | 40              | 0               | 0              | 0              | 0                | 0                | 0         | 0          | 0            | 0             | 0        | 0              | 0       | 0    | 0                        | 0         | 0     | 0                    | 0        |
| L80        | 0               | 0               | 0              | 25             | 25               | 0                | 0         | 0          | 0            | 0             | 0        | 0              | 0       | 15   | 0                        | 0         | 0     | 0                    | 0        |
| L80        | 0               | 0               | 0              | 0              | 0                | 0                | 0         | 0          | 0            | 0             | 0        | 0              | 0       | 40   | 0                        | 0         | 0     | 0                    | 0        |
| L84        | 0               | 0               | 0              | 36             | 36               | 0                | 0         | 0          | 0            | 0             | 0        | 0              | 4       | 0    | 0                        | 0         | 0     | 0                    | 0        |
| L22        | 0               | 0               | 0              | 4              | 4                | 0                | 0         | 0          | 0            | 0             | 0        | 0              | 36      | 0    | 0                        | 0         | 0     | 0                    | 0        |
| L12        | 28              | 0               | 5              | 7              | 7                | 0                | 0         | 0          | 0            | 0             | 0        | 0              | 0       | 0    | 0                        | 0         | 0     | 0                    | 0        |
| L3         | 36              | 0               | 0              | 4              | 4                | 0                | 0         | 0          | 0            | 0             | 0        | 0              | 0       | 0    | 0                        | 0         | 0     | 0                    | 0        |
| L12        | 40              | 0               | 0              | 0              | 0                | 0                | 0         | 0          | 0            | 0             | 0        | 0              | 0       | 0    | 0                        | 0         | 0     | 0                    | 0        |
| L12        | 33              | 0               | 0              | 3              | 3                | 0                | 0         | 0          | 0            | 0             | 0        | 0              | 4       | 0    | 0                        | 0         | 0     | 0                    | 0        |
| L11        | 0               | 11              | 0              | 6              | 6                | 0                | 0         | 0          | 0            | 2             | 0        | 0              | 0       | 21   | 0                        | 0         | 0     | 0                    | 0        |
| L12        | 0               | 0               | 0              | 8              | 8                | 0                | 0         | 0          | 0            | 0             | 0        | 0              | 0       | 32   | 0                        | 0         | 0     | 0                    | 0        |
| L12        | 0               | 0               | 0              | 0              | 0                | 9                | 31        | 0          | 0            | 0             | 0        | 0              | 0       | 0    | 0                        | 0         | 0     | 0                    | 0        |
| L54        | 0               | 15              | 0              | 4              | 4                | 0                | 20        | 1          | 0            | 0             | 0        | 0              | 0       | 0    | 0                        | 0         | 0     | 0                    | 0        |
| L35        | 0               | 0               | 0              | 0              | 0                | 3                | 0         | 9          | 0            | 0             | 0        | 0              | 0       | 28   | 0                        | 0         | 0     | 0                    | 0        |
| L19        | 18              | 0               | 0              | 0              | 0                | 0                | 0         | 15         | 0            | 0             | 0        | 0              | 0       | 0    | 0                        | 0         | 0     | 0                    | 7        |
| L35        | 7               | 0               | 0              | 4              | 4                | 0                | 0         | 0          | 0            | 0             | 0        | 0              | 0       | 29   | 0                        | 0         | 0     | 0                    | 0        |
| L67        | 0               | 0               | 0              | 0              | 0                | 0                | 0         | 0          | 40           | 0             | 0        | 0              | 0       | 0    | 0                        | 0         | 0     | 0                    | 0        |
| L13        | 33              | 0               | 0              | 3              | 3                | 0                | 0         | 4          | 0            | 0             | 0        | 0              | 0       | 0    | 0                        | 0         | 0     | 0                    | 0        |
| L82        | 0               | 0               | 0              | 0              | 0                | 0                | 0         | 0          | 0            | 0             | 0        | 0              | 0       | 0    | 0                        | 0         | 0     | 0                    | 0        |
| L86        | 0               | 0               | 0              | 0              | 0                | 0                | 0         | 0          | 0            | 0             | 0        | 0              | 0       | 0    | 0                        | 0         | 0     | 40                   | 0        |
| L76        | 0               | 0               | 0              | 0              | 0                | 0                | 0         | 0          | 0            | 0             | 0        | 0              | 0       | 40   | 0                        | 0         | 0     | 0                    | 0        |
| L35        | 13              | 0               | 0              | 0              | 0                | 0                | 0         | 0          | 0            | 0             | 0        | 0              | 0       | 0    | 0                        | 0         | 0     | 0                    | 27       |
| L76        | 0               | 0               | 0              | 0              | 0                | 0                | 0         | 0          | 0            | 0             | 0        | 0              | 0       | 40   | 0                        | 0         | 0     | 0                    | 0        |
| L87        | 0               | 0               | 0              | 0              | 0                | 0                | 0         | 0          | 0            | 0             | 0        | 0              | 0       | 0    | 0                        | 0         | 0     | 40                   | 0        |
| L30        | 3               | 0               | 0              | 0              | 0                | 0                | 0         | 0          | 0            | 1             | 0        | 0              | 0       | 36   | 0                        | 0         | 0     | 0                    | 0        |
| L30        | 0               | 0               | 0              | 0              | 0                | 0                | 0         | 0          | 0            | 0             | 0        | 0              | 0       | 40   | 0                        | 0         | 0     | 0                    | 0        |
| L56        | 0               | 0               | 0              | 9              | 9                | 0                | 31        | 0          | 0            | 0             | 0        | 0              | 0       | 0    | 0                        | 0         | 0     | 0                    | 0        |
| L30        | 0               | 0               | 0              | 0              | 0                | 0                | 0         | 0          | 0            | 0             | 0        | 0              | 0       | 32   | 0                        | 0         | 0     | 0                    | 0        |
| L30        | 0               | 0               | 0              | 0              | 0                | 0                | 0         | 0          | 0            | 0             | 0        | 0              | 0       | 40   | 0                        | 0         | 0     | 0                    | 0        |
| L30        | 40              | 0               | 0              | 0              | 0                | 0                | 0         | 0          | 0            | 0             | 0        | 0              | 0       | 0    | 0                        | 0         | 0     | 0                    | 0        |
| L71        | 0               | 0               | 0              | 0              | 0                | 0                | 0         | 0          | 0            | 0             | 0        | 0              | 40      | 0    | 0                        | 0         | 0     | 0                    | 0        |
| L68        | 0               | 0               | 0              | 0              | 0                | 0                | 0         | 5          | 0            | 0             | 0        | 0              | 0       | 0    | 0                        | 0         | 0     | 0                    | 35       |
| L71        | 0               | 0               | 0              | 0              | 0                | 0                | 0         | 0          | 0            | 0             | 0        | 0              | 40      | 0    | 0                        | 0         | 0     | 0                    | 0        |
| L55        | 40              | 0               | 0              | 0              | 0                | 0                | 0         | 0          | 0            | 0             | 0        | 0              | 0       | 0    | 0                        | 0         | 0     | 0                    | 0        |
| L5         | 21              | 0               | 0              | 0              | 0                | 0                | 0         | 0          | 0            | 0             | 2        | 0              | 17      | 0    | 0                        | 0         | 0     | 0                    | 0        |
| L14        | 0               | 0               | 0              | 0              | 0                | 0                | 5         | 0          | 0            | 23            | 0        | 0              | 0       | 0    | 0                        | 0         | 0     | 0                    | 12       |
| L5         | 40              | 0               | 0              | 0              | 0                | 0                | 0         | 0          | 0            | 0             | 0        | 0              | 0       | 0    | 0                        | 0         | 0     | 0                    | 0        |
| L86        | 0               | 0               | 0              | 0              | 0                | 0                | 0         | 0          | 0            | 0             | 0        | 0              | 0       | 0    | 0                        | 0         | 0     | 40                   | 0        |
| L5         | 17              | 0               | 0              | 0              | 0                | 0                | 0         | 0          | 0            | 0             | 0        | 0              | 0       | 23   | 0                        | 0         | 0     | 0                    | 0        |
| L5         | 18              | 0               | 0              | 2              | 2                | 0                | 0         | 0          | 0            | 2             | 0        | 0              | 0       | 18   | 0                        | 0         | 0     | 0                    | 0        |
| L5         | 21              | 0               | 0              | 0              | 0                | 0                | 0         | 0          | 0            | 0             | 0        | 0              | 0       | 19   | 0                        | 0         | 0     | 0                    | 0        |
| L5         | 17              | 0               | 0              | 0              | 0                | 0                | 0         | 0          | 0            | 0             | 0        | 0              | 0       | 23   | 0                        | 0         | 0     | 0                    | 0        |
| L86        | 0               | 0               | 0              | 0              | 0                | 0                | 0         | 0          | 0            | 0             | 0        | 0              | 0       | 0    | 0                        | 0         | 0     | 40                   | 0        |
| L36        | 0               | 0               | 0              | 0              | 0                | 0                | 0         | 0          | 0            | 0             | 0        | 0              | 0       | 40   | 0                        | 0         | 0     | 0                    | 0        |
| L68        | 0               | 0               | 0              | 0              | 0                | 0                | 0         | 7          | 0            | 0             | 0        | 0              | 0       | 33   | 0                        | 0         | 0     | 0                    | 0        |
| L64        | 0               | 0               | 0              | 0              | 0                | 0                | 0         | 0          | 0            | 0             | 0        | 0              | 0       | 40   | 0                        | 0         | 0     | 0                    | 0        |
| L22        | 0               | 0               | 0              | 0              | 0                | 0                | 0         | 0          | 0            | 0             | 0        | 0              | 0       | 40   | 0                        | 0         | 0     | 0                    | 0        |
| L71        | 0               | 0               | 0              | 0              | 0                | 0                | 0         | 0          | 0            | 0             | 0        | 0              | 0       | 0    | 0                        | 0         | 0     | 0                    | 0        |
| L45        | 0               | 9               | 0              | 24             | 24               | 0                | 0         | 0          | 0            | 0             | 0        | 0              | 0       | 2    | 0                        | 0         | 0     | 0                    | 0        |
| L9         | 6               | 2               | 2              | 2              | 2                | 0                | 0         | 4          | 2            | 0             | 0        | 0              | 0       | 4    | 0                        | 0         | 0     | 0                    | 18       |
| L3         | 34              | 0               | 2              | 2              | 2                | 0                | 0         | 1          | 1            | 0             | 0        | 0              | 0       | 0    | 0                        | 0         | 0     | 0                    | 0        |
| L71        | 0               | 40              | 0              | 0              | 0                | 0                | 0         | 0          | 0            | 0             | 0        | 0              | 0       | 0    | 0                        | 0         | 0     | 0                    | 0        |
| L50        | 11              | 0               | 0              | 6              | 6                | 0                | 0         | 0          | 0            | 0             | 0        | 0              | 0       | 17   | 0                        | 2         | 0     | 0                    | 4        |
| L39        | 0               | 7               | 0              | 0              | 0                | 0                | 0         | 0          | 13           | 0             | 0        | 0              | 0       | 19   | 0                        | 0         | 0     | 0                    | 1        |
| L86        | 0               | 0               | 0              | 0              | 0                | 0                | 0         | 0          | 0            | 0             | 0        | 0              | 0       | 0    | 0                        | 0         | 0     | 40                   | 0        |
| L86        | 0               | 0               | 0              | 0              | 0                | 0                | 0         | 0          | 0            | 0             | 0        | 0              | 0       | 0    | 0                        | 0         | 0     | 40                   | 0        |
| L86        | 0               | 0               | 0              | 0              | 0                | 0                | 0         | 0          | 0            | 0             | 0        | 0              | 0       | 7    | 0                        | 0         | 0     | 33                   | 0        |
| L86        | 0               | 0               | 0              | 0              | 0                | 0                | 0         | 0          | 0            | 0             | 0        | 0              | 0       | 7    | 0                        | 0         | 0     | 32                   | 1        |
| L65        | 0               | 0               | 0              | 0              | 0                | 0                | 0         | 0          | 40           | 0             | 0        | 0              | 0       | 0    | 0                        | 0         | 0     | 0                    | 0        |
| L59        | 0               | 0               | 0              | 1              | 1                | 0                | 0         | 0          | 3            | 28            | 0        | 0              | 0       | 0    | 0                        | 0         | 0     | 0                    | 0        |
| L46        | 0               | 10              | 0              | 0              | 0                | 0                | 0         | 30         | 0            | 0             | 0        | 0              | 0       | 0    | 0                        | 0         | 0     | 0                    | 0        |
| L22        | 0               | 40              | 0              | 0              | 0                | 0                | 0         | 0          | 0            | 0             | 0        | 0              | 0       | 0    | 0                        | 0         | 0     | 0                    | 0        |
| L39        | 0               | 0               | 0              | 0              | 0                | 0                | 30        | 0          | 0            | 0             | 0        | 0              | 0       | 0    | 0                        | 0         | 0     | 0                    | 10       |
| L29        | 0               | 29              | 0              | 0              | 0                | 0                | 0         | 0          | 0            | 0             | 0        | 0              | 0       | 0    | 0                        | 0         | 0     | 0                    | 2        |
| L86        | 0               | 0               | 0              | 0              | 0                | 0                | 0         | 0          | 0            | 0             | 0        | 0              | 0       | 40   | 0                        | 0         | 0     | 0                    | 0        |
| L9         | 5               | 0               | 11             | 0              | 0                | 0                | 0         | 4          | 5            | 0             | 0        | 0              | 0       | 0    | 0                        | 0         | 0     | 0                    | 15       |
| L29        | 0               | 38              | 0              | 0              | 0                | 0                | 0         | 0          | 0            | 2             |          |                |         |      |                          |           |       |                      |          |

| Species ID | micro-crustacea | macro-crustacea | micro-bivalvia | macro-bivalvia | micro-gastropoda | macro-gastropoda | Brachyura | Polychaeta | Foraminifera | Echinodermata | Copepoda | gnathid Isopod | Anomura | fish | amorphous organic matter | Black AOM | algae | coral organic matter | sediment |
|------------|-----------------|-----------------|----------------|----------------|------------------|------------------|-----------|------------|--------------|---------------|----------|----------------|---------|------|--------------------------|-----------|-------|----------------------|----------|
| L33        | 17              | 0               | 0              | 5              | 5                | 0                | 5         | 0          | 0            | 0             | 0        | 0              | 0       | 0    | 12                       | 0         | 1     | 0                    | 0        |
| L24        | 12              | 0               | 0              | 0              | 0                | 0                | 0         | 0          | 0            | 0             | 0        | 0              | 0       | 0    | 23                       | 0         | 0     | 0                    | 3        |
| L37        | 0               | 0               | 0              | 17             | 17               | 0                | 0         | 0          | 0            | 0             | 0        | 0              | 23      | 0    | 0                        | 0         | 0     | 0                    | 0        |
| L33        | 4               | 0               | 0              | 27             | 27               | 0                | 0         | 0          | 1            | 0             | 0        | 0              | 0       | 0    | 3                        | 0         | 3     | 0                    | 2        |
| L33        | 0               | 17              | 0              | 0              | 0                | 0                | 0         | 0          | 9            | 0             | 0        | 0              | 0       | 0    | 11                       | 0         | 0     | 0                    | 3        |
| L33        | 4               | 0               | 2              | 0              | 0                | 0                | 0         | 0          | 26           | 1             | 0        | 0              | 0       | 0    | 4                        | 0         | 0     | 0                    | 3        |
| L39        | 0               | 0               | 0              | 3              | 3                | 0                | 0         | 0          | 0            | 0             | 0        | 0              | 0       | 0    | 8                        | 0         | 0     | 0                    | 0        |
| L57        | 0               | 0               | 0              | 0              | 0                | 0                | 40        | 0          | 0            | 0             | 0        | 0              | 0       | 0    | 0                        | 0         | 0     | 0                    | 0        |
| L33        | 0               | 0               | 0              | 2              | 2                | 0                | 0         | 5          | 0            | 0             | 0        | 0              | 0       | 0    | 28                       | 0         | 0     | 0                    | 5        |
| L55        | 0               | 21              | 0              | 19             | 19               | 0                | 0         | 0          | 0            | 0             | 0        | 0              | 0       | 0    | 0                        | 0         | 0     | 0                    | 0        |
| L14        | 2               | 0               | 0              | 3              | 3                | 0                | 0         | 0          | 0            | 0             | 35       | 0              | 0       | 0    | 0                        | 0         | 0     | 0                    | 0        |
| L40        | 0               | 0               | 0              | 0              | 0                | 0                | 0         | 0          | 0            | 0             | 0        | 0              | 0       | 0    | 40                       | 0         | 0     | 0                    | 0        |
| L33        | 0               | 0               | 23             | 6              | 6                | 0                | 0         | 0          | 0            | 0             | 0        | 0              | 3       | 0    | 0                        | 0         | 0     | 0                    | 8        |
| L33        | 4               | 0               | 23             | 2              | 2                | 0                | 0         | 9          | 2            | 0             | 0        | 0              | 0       | 0    | 0                        | 0         | 0     | 0                    | 0        |
| L33        | 0               | 24              | 0              | 2              | 2                | 0                | 0         | 0          | 3            | 0             | 0        | 0              | 0       | 0    | 2                        | 0         | 0     | 0                    | 9        |
| L59        | 24              | 0               | 0              | 0              | 0                | 0                | 14        | 0          | 0            | 2             | 0        | 0              | 0       | 0    | 0                        | 0         | 0     | 0                    | 0        |
| L33        | 0               | 21              | 0              | 0              | 0                | 0                | 0         | 0          | 0            | 0             | 0        | 0              | 0       | 0    | 12                       | 0         | 0     | 0                    | 7        |
| L57        | 0               | 0               | 0              | 0              | 0                | 0                | 40        | 0          | 0            | 0             | 0        | 0              | 0       | 0    | 0                        | 0         | 0     | 0                    | 0        |
| L24        | 0               | 0               | 0              | 0              | 0                | 0                | 0         | 0          | 0            | 0             | 0        | 0              | 0       | 0    | 37                       | 0         | 0     | 0                    | 3        |
| L19        | 3               | 8               | 0              | 0              | 0                | 0                | 0         | 0          | 0            | 0             | 23       | 0              | 0       | 0    | 0                        | 6         | 0     | 0                    | 0        |
| L24        | 28              | 0               | 0              | 0              | 0                | 0                | 0         | 0          | 0            | 0             | 0        | 0              | 0       | 0    | 7                        | 0         | 0     | 0                    | 5        |
| L55        | 0               | 0               | 20             | 0              | 0                | 0                | 0         | 0          | 0            | 0             | 0        | 0              | 0       | 0    | 0                        | 0         | 0     | 0                    | 0        |
| L71        | 0               | 0               | 0              | 0              | 0                | 0                | 40        | 0          | 0            | 0             | 0        | 0              | 0       | 0    | 0                        | 0         | 0     | 0                    | 0        |
| L58        | 0               | 0               | 18             | 0              | 0                | 0                | 0         | 0          | 0            | 8             | 0        | 0              | 0       | 0    | 0                        | 0         | 0     | 0                    | 14       |
| L58        | 0               | 40              | 0              | 0              | 0                | 0                | 0         | 0          | 0            | 0             | 0        | 0              | 0       | 0    | 0                        | 0         | 0     | 0                    | 0        |
| L56        | 11              | 0               | 6              | 14             | 14               | 0                | 0         | 0          | 0            | 9             | 0        | 0              | 0       | 0    | 0                        | 0         | 0     | 0                    | 0        |
| L56        | 0               | 0               | 0              | 30             | 30               | 0                | 0         | 0          | 0            | 10            | 0        | 0              | 0       | 0    | 0                        | 0         | 0     | 0                    | 0        |
| L54        | 0               | 0               | 0              | 0              | 0                | 0                | 0         | 0          | 0            | 0             | 0        | 0              | 40      | 0    | 0                        | 0         | 0     | 0                    | 0        |
| L71        | 0               | 0               | 0              | 0              | 0                | 19               | 0         | 0          | 0            | 0             | 0        | 0              | 0       | 21   | 0                        | 0         | 0     | 0                    | 0        |
| L68        | 0               | 0               | 0              | 1              | 1                | 0                | 0         | 0          | 39           | 0             | 0        | 0              | 0       | 0    | 0                        | 0         | 0     | 0                    | 0        |
| L37        | 21              | 0               | 0              | 15             | 15               | 0                | 0         | 0          | 0            | 4             | 0        | 0              | 0       | 0    | 0                        | 0         | 0     | 0                    | 0        |
| L47        | 0               | 0               | 0              | 0              | 0                | 0                | 0         | 0          | 0            | 40            | 0        | 0              | 0       | 0    | 0                        | 0         | 0     | 0                    | 0        |
| L84        | 0               | 0               | 11             | 24             | 24               | 2                | 0         | 0          | 0            | 0             | 0        | 3              | 0       | 0    | 0                        | 0         | 0     | 0                    | 0        |
| L24        | 0               | 0               | 0              | 0              | 0                | 0                | 0         | 0          | 0            | 0             | 0        | 0              | 0       | 0    | 0                        | 0         | 0     | 0                    | 0        |
| L54        | 0               | 0               | 0              | 7              | 7                | 0                | 7         | 0          | 0            | 0             | 0        | 0              | 26      | 0    | 0                        | 0         | 0     | 0                    | 0        |
| L46        | 0               | 0               | 5              | 0              | 0                | 0                | 0         | 0          | 0            | 0             | 0        | 0              | 0       | 0    | 35                       | 0         | 0     | 0                    | 0        |
| L46        | 0               | 7               | 0              | 0              | 0                | 0                | 0         | 0          | 0            | 30            | 0        | 0              | 0       | 0    | 3                        | 0         | 0     | 0                    | 0        |
| L58        | 0               | 0               | 0              | 0              | 0                | 0                | 40        | 0          | 0            | 0             | 0        | 0              | 0       | 0    | 0                        | 0         | 0     | 0                    | 0        |
| L39        | 0               | 0               | 0              | 1              | 1                | 0                | 0         | 0          | 2            | 0             | 0        | 0              | 0       | 0    | 28                       | 0         | 0     | 0                    | 0        |
| L20        | 28              | 1               | 0              | 0              | 0                | 0                | 0         | 1          | 0            | 0             | 0        | 0              | 0       | 0    | 7                        | 0         | 0     | 0                    | 3        |
| L57        | 0               | 0               | 0              | 40             | 40               | 0                | 0         | 0          | 0            | 0             | 0        | 0              | 0       | 0    | 0                        | 0         | 0     | 0                    | 0        |
| L24        | 2               | 0               | 0              | 0              | 0                | 0                | 0         | 1          | 0            | 0             | 0        | 0              | 0       | 0    | 35                       | 0         | 0     | 0                    | 0        |
| L71        | 0               | 40              | 0              | 0              | 0                | 0                | 0         | 0          | 0            | 0             | 0        | 0              | 0       | 0    | 0                        | 0         | 0     | 0                    | 0        |
| L71        | 0               | 0               | 0              | 0              | 0                | 0                | 40        | 0          | 0            | 0             | 0        | 0              | 0       | 0    | 0                        | 0         | 0     | 0                    | 0        |
| L7         | 36              | 2               | 1              | 1              | 1                | 0                | 0         | 0          | 0            | 0             | 0        | 0              | 0       | 0    | 0                        | 0         | 0     | 0                    | 0        |
| L71        | 0               | 40              | 0              | 0              | 0                | 0                | 0         | 0          | 0            | 0             | 0        | 0              | 0       | 0    | 0                        | 0         | 0     | 0                    | 0        |
| L65        | 0               | 8               | 19             | 1              | 1                | 0                | 0         | 0          | 0            | 12            | 0        | 0              | 0       | 0    | 0                        | 0         | 0     | 0                    | 0        |
| L33        | 0               | 0               | 0              | 0              | 0                | 0                | 0         | 0          | 1            | 0             | 0        | 0              | 0       | 0    | 0                        | 0         | 0     | 0                    | 39       |
| L8         | 18              | 0               | 0              | 0              | 0                | 0                | 0         | 0          | 0            | 0             | 17       | 0              | 0       | 0    | 1                        | 0         | 0     | 0                    | 0        |
| L34        | 0               | 0               | 0              | 27             | 27               | 0                | 13        | 0          | 0            | 0             | 0        | 0              | 0       | 0    | 0                        | 0         | 0     | 0                    | 0        |
| L8         | 23              | 0               | 1              | 0              | 0                | 0                | 1         | 0          | 0            | 0             | 11       | 0              | 0       | 0    | 4                        | 0         | 0     | 0                    | 0        |
| L34        | 32              | 0               | 0              | 8              | 8                | 0                | 0         | 0          | 0            | 0             | 0        | 0              | 0       | 0    | 0                        | 0         | 0     | 0                    | 0        |
| L18        | 4               | 0               | 0              | 0              | 0                | 0                | 0         | 0          | 0            | 0             | 33       | 0              | 0       | 0    | 0                        | 0         | 0     | 0                    | 3        |
| L8         | 24              | 0               | 0              | 0              | 0                | 0                | 0         | 0          | 0            | 0             | 12       | 0              | 0       | 0    | 4                        | 0         | 0     | 0                    | 0        |
| L8         | 4               | 0               | 0              | 0              | 0                | 0                | 0         | 2          | 0            | 0             | 33       | 0              | 0       | 0    | 1                        | 0         | 0     | 0                    | 0        |
| L14        | 2               | 5               | 0              | 0              | 0                | 0                | 0         | 2          | 0            | 0             | 31       | 0              | 0       | 0    | 0                        | 0         | 0     | 0                    | 0        |
| L8         | 0               | 0               | 0              | 0              | 0                | 0                | 1         | 0          | 0            | 0             | 38       | 0              | 0       | 0    | 1                        | 0         | 0     | 0                    | 0        |
| L58        | 4               | 0               | 0              | 0              | 0                | 0                | 13        | 1          | 0            | 0             | 0        | 0              | 0       | 0    | 0                        | 0         | 0     | 0                    | 22       |
| L8         | 3               | 0               | 0              | 0              | 0                | 0                | 0         | 0          | 0            | 0             | 37       | 0              | 0       | 0    | 0                        | 0         | 0     | 0                    | 0        |
| L68        | 0               | 0               | 0              | 1              | 1                | 0                | 0         | 0          | 39           | 0             | 0        | 0              | 0       | 0    | 0                        | 0         | 0     | 0                    | 0        |
| L8         | 7               | 0               | 0              | 0              | 0                | 0                | 0         | 0          | 0            | 0             | 30       | 0              | 0       | 0    | 3                        | 0         | 0     | 0                    | 0        |
| L37        | 26              | 0               | 0              | 14             | 14               | 0                | 0         | 0          | 0            | 0             | 0        | 0              | 0       | 0    | 0                        | 0         | 0     | 0                    | 0        |
| L70        | 0               | 0               | 0              | 18             | 18               | 0                | 15        | 0          | 0            | 7             | 0        | 0              | 0       | 0    | 0                        | 0         | 0     | 0                    | 0        |
| L52        | 11              | 0               | 0              | 9              | 9                | 0                | 0         | 0          | 7            | 0             | 0        | 0              | 0       | 0    | 0                        | 0         | 0     | 0                    | 13       |
| L32        | 34              | 0               | 0              | 0              | 0                | 0                | 0         | 0          | 0            | 0             | 0        | 0              | 0       | 0    | 0                        | 0         | 0     | 0                    | 6        |
| L16        | 0               | 0               | 0              | 0              | 0                | 0                | 0         | 0          | 0            | 0             | 38       | 0              | 0       | 0    | 2                        | 0         | 0     | 0                    | 0        |
| L32        | 40              | 0               | 0              | 0              | 0                | 0                | 0         | 0          | 0            | 0             | 0        | 0              | 0       | 0    | 0                        | 0         | 0     | 0                    | 0        |
| L32        | 27              | 0               | 0              | 13             | 13               | 0                | 0         | 0          | 0            | 0             | 0        | 0              | 0       | 0    | 0                        | 0         | 0     | 0                    | 0        |
| L32        | 11              | 0               | 18             | 0              | 0                | 0                | 0         | 0          | 0            | 0             | 0        | 0              | 0       | 0    | 0                        | 0         | 0     | 0                    | 11       |
| L32        | 9               | 0               | 3              | 16             | 16               | 0                | 0         | 0          | 12           | 0             | 0        | 0              | 0       | 0    | 0                        | 0         | 0     | 0                    | 0        |
| L80        | 0               | 0               | 0              | 0              | 0                | 28               | 0         | 0          | 0            | 0             | 0        | 0              | 12      | 0    | 0                        | 0         | 0     | 0                    | 0        |
| L59        | 0               | 0               | 0              | 0              | 0                | 11               | 0         | 0          | 0            | 29            | 0        | 0              | 0       | 0    | 0                        | 0         | 0     | 0                    | 0        |
| L84        | 0               | 0               | 17             | 20             | 20               | 1                | 0         | 0          | 0            | 0             | 0        | 0              | 2       | 0    | 0                        | 0         | 0     | 0                    | 0        |
| L84        | 0               | 0               | 0              | 0              | 0                | 22               | 10        | 0          | 0            | 0             | 0        | 0              | 0       | 0    | 8                        | 0         | 0     | 0                    | 0        |
| L82        | 0               | 0               | 0              | 0              | 0                | 0                | 0         | 0          | 0            | 0             | 0        | 0              | 0       | 0    | 0                        | 0         | 0     | 0                    | 0        |
| L65        | 0               | 0               | 0              | 0              | 0                | 0                | 0         | 0          | 0            | 40            | 0        | 0              | 0       | 0    | 0                        | 0         | 0     | 0                    | 0        |
| L82        | 0               | 16              | 0              | 0              | 0                | 0                | 0         | 0          | 0            | 0             | 0        | 0              | 0       | 24   | 0                        | 0         | 0     | 0                    | 0        |
| L35        | 0               | 5               | 0              | 3              | 3                | 0                | 0         | 18         | 0            | 0             | 0        | 0              | 0       | 0    | 7                        | 0         | 3     | 0                    | 2        |
| L71        | 0               | 40              | 0              | 0              | 0                | 0                | 0         | 0          | 0            | 0             | 0        | 0              | 0       | 0    | 0                        | 0         | 0     | 0                    | 0        |
| L57        | 0               | 0               | 0              | 0              | 0                | 14               | 10        | 0          | 0            | 6             | 0        | 0              | 0       | 0    | 8                        | 0         | 0     | 0                    | 2        |
| L68        | 0               | 0               | 0              | 0              | 0                | 0                | 0         | 0          | 40           | 0             | 0        | 0              | 0       | 0    | 0                        | 0         | 0     | 0                    | 0        |
| L57        | 0               | 0               | 0              | 0              | 0                | 0                | 0         | 0          | 0            | 37            | 0        | 0              | 0       | 0    | 3                        | 0         | 0     | 0                    | 0        |
| L3         | 26              | 0               | 2              | 1              | 1                | 0                | 0         | 0          | 1            | 0             | 0        | 0              | 0       | 2    | 6                        | 0         | 2     | 0                    | 0        |
| L58        | 0               | 0               | 21             | 0              | 0                | 19               | 0         | 0          | 0            | 0             | 0        | 0              | 0       | 0    | 0                        | 0         | 0     | 0                    | 0        |
| L3         | 19              | 2               | 0              | 3              | 3                | 0                | 0         | 0          | 1            | 0             | 0        | 0              | 0       | 0    | 15                       | 0         | 0     | 0                    | 0        |
| L58        | 0               | 0               | 0              | 0              | 0                | 0                | 27        | 0          | 0            | 0             | 0        | 0              | 0       | 0    | 0                        | 0         | 0     | 0                    | 0        |
| L3         | 10              | 14              | 0              | 0              | 0                | 0                | 0         | 1          | 0            | 0             | 0        | 0              | 0       | 0    | 8                        | 0         | 0     | 0                    | 4        |
| L58        | 0               | 0               | 0              | 0              | 0                | 0                | 3         | 15         | 6            | 0             | 0        | 0              | 0       | 0    | 0                        | 0         | 0     | 0                    | 16       |
| L3         | 18              | 0               | 11             | 4              | 4                | 0                | 0         | 2          | 0            | 0             | 0        | 0              | 0       | 0    | 5                        | 0         | 0     | 0                    | 0        |
| L58        | 0               | 0               | 31             | 3              | 3                | 0                | 0         | 4          | 2            | 0             | 0        | 0              | 0       | 0    | 0                        | 0         | 0     | 0                    | 0        |
| L78        | 0               | 0               | 0              | 0              | 0                | 2                | 0         | 0          | 0            | 0             | 0        | 0              | 0       | 0    | 3                        | 0         | 0     | 0                    | 0        |
| L58        | 0               | 0               | 0              | 2              | 2                | 5                | 33        | 0          | 0            | 0             | 0        | 0              | 0       | 0    | 0                        | 0         | 0     | 0                    | 0        |
| L77        | 0               | 0               | 0              | 0              | 0                | 0                | 0         | 0          | 0            | 0             | 0        | 0              | 0       | 0    | 2                        | 0         | 0     | 0                    | 2        |
| L58        | 0               | 40              | 0              | 0              | 0                | 0                | 0         | 0          | 0            | 0             | 0        | 0              | 0       | 0    | 0                        | 0         | 0     | 0                    | 0        |
| L67        | 0               | 0               | 0              | 0              | 0                | 0                | 0         | 0          | 0            | 39            | 0        | 0              | 0       | 0    | 0                        | 0         | 0     | 0                    | 0        |
| L58        | 0               | 0               | 10             | 0              | 0                |                  |           |            |              |               |          |                |         |      |                          |           |       |                      |          |

| Species ID | micro-crustacea | macro-crustacea | micro-bivalvia | macro-bivalvia | micro-gastropoda | macro-gastropoda | Brachyura | Polychaeta | Foraminifera | Echinodermata | Copepoda | gnathid Isopod | Anomura | fish | amorphous organic matter | Black AOM | algae | coral organic matter | sediment |
|------------|-----------------|-----------------|----------------|----------------|------------------|------------------|-----------|------------|--------------|---------------|----------|----------------|---------|------|--------------------------|-----------|-------|----------------------|----------|
| L58        | 0               | 0               | 0              | 0              | 0                | 6                | 34        | 0          | 0            | 0             | 0        | 0              | 0       | 0    | 0                        | 0         | 0     | 0                    | 0        |
| L30        | 0               | 0               | 0              | 0              | 0                | 0                | 0         | 0          | 0            | 0             | 0        | 0              | 0       | 0    | 38                       | 0         | 0     | 0                    | 2        |
| L30        | 0               | 0               | 0              | 1              | 1                | 0                | 0         | 0          | 2            | 0             | 0        | 0              | 0       | 0    | 37                       | 0         | 0     | 0                    | 0        |
| L50        | 37              | 0               | 0              | 3              | 3                | 0                | 0         | 0          | 0            | 0             | 0        | 0              | 0       | 0    | 0                        | 0         | 0     | 0                    | 0        |
| L30        | 2               | 0               | 0              | 3              | 3                | 0                | 0         | 0          | 0            | 0             | 0        | 0              | 0       | 0    | 33                       | 0         | 0     | 0                    | 2        |
| L39        | 0               | 0               | 4              | 6              | 6                | 0                | 0         | 0          | 2            | 0             | 0        | 0              | 0       | 0    | 0                        | 0         | 0     | 0                    | 28       |
| L30        | 0               | 0               | 0              | 0              | 0                | 0                | 0         | 0          | 0            | 0             | 0        | 0              | 0       | 0    | 33                       | 0         | 0     | 0                    | 7        |
| L48        | 40              | 0               | 0              | 0              | 0                | 0                | 0         | 0          | 0            | 0             | 0        | 0              | 0       | 0    | 0                        | 0         | 0     | 0                    | 0        |
| L30        | 11              | 0               | 0              | 0              | 0                | 0                | 0         | 0          | 0            | 0             | 0        | 0              | 0       | 0    | 29                       | 0         | 0     | 0                    | 0        |
| L14        | 0               | 2               | 0              | 0              | 0                | 0                | 0         | 0          | 0            | 0             | 14       | 0              | 0       | 0    | 0                        | 0         | 0     | 0                    | 24       |
| L30        | 7               | 0               | 0              | 1              | 1                | 0                | 0         | 0          | 2            | 0             | 0        | 0              | 0       | 0    | 28                       | 0         | 0     | 0                    | 2        |
| L32        | 0               | 0               | 0              | 34             | 34               | 0                | 0         | 0          | 6            | 0             | 0        | 0              | 0       | 0    | 0                        | 0         | 0     | 0                    | 0        |
| L23        | 0               | 0               | 0              | 0              | 0                | 0                | 0         | 0          | 1            | 0             | 0        | 0              | 0       | 0    | 37                       | 0         | 0     | 0                    | 0        |
| L32        | 0               | 0               | 0              | 0              | 0                | 0                | 0         | 40         | 0            | 0             | 0        | 0              | 0       | 0    | 0                        | 0         | 0     | 0                    | 0        |
| L23        | 0               | 0               | 0              | 0              | 0                | 0                | 0         | 0          | 0            | 0             | 0        | 0              | 0       | 0    | 40                       | 0         | 0     | 0                    | 0        |
| L52        | 32              | 0               | 0              | 0              | 0                | 0                | 0         | 0          | 0            | 0             | 0        | 0              | 0       | 0    | 8                        | 0         | 0     | 0                    | 0        |
| L23        | 2               | 0               | 0              | 0              | 0                | 0                | 0         | 0          | 0            | 0             | 0        | 0              | 0       | 0    | 38                       | 0         | 0     | 0                    | 0        |
| L16        | 0               | 0               | 0              | 0              | 0                | 0                | 0         | 0          | 0            | 0             | 0        | 0              | 0       | 0    | 0                        | 0         | 0     | 0                    | 40       |
| L23        | 0               | 0               | 0              | 0              | 0                | 0                | 0         | 0          | 0            | 0             | 0        | 0              | 0       | 0    | 40                       | 0         | 0     | 0                    | 0        |
| L16        | 31              | 0               | 0              | 0              | 0                | 0                | 0         | 0          | 0            | 0             | 0        | 0              | 0       | 0    | 0                        | 0         | 0     | 0                    | 9        |
| L30        | 0               | 0               | 0              | 0              | 0                | 0                | 0         | 3          | 2            | 0             | 0        | 0              | 0       | 0    | 28                       | 0         | 0     | 0                    | 7        |
| L16        | 40              | 0               | 0              | 0              | 0                | 0                | 0         | 0          | 0            | 0             | 0        | 0              | 0       | 0    | 0                        | 0         | 0     | 0                    | 0        |
| L30        | 2               | 0               | 0              | 0              | 0                | 0                | 0         | 0          | 0            | 0             | 0        | 0              | 0       | 0    | 38                       | 0         | 0     | 0                    | 0        |
| L3         | 0               | 32              | 0              | 0              | 0                | 3                | 4         | 0          | 0            | 0             | 1        | 0              | 0       | 0    | 0                        | 0         | 0     | 0                    | 0        |
| L30        | 0               | 0               | 0              | 0              | 0                | 0                | 0         | 0          | 1            | 0             | 0        | 0              | 0       | 0    | 37                       | 0         | 0     | 0                    | 2        |
| L16        | 40              | 0               | 0              | 0              | 0                | 0                | 0         | 0          | 0            | 0             | 0        | 0              | 0       | 0    | 0                        | 0         | 0     | 0                    | 0        |
| L30        | 3               | 0               | 0              | 0              | 0                | 0                | 0         | 0          | 1            | 0             | 0        | 0              | 0       | 0    | 36                       | 0         | 0     | 0                    | 0        |
| L17        | 40              | 0               | 0              | 0              | 0                | 0                | 0         | 0          | 0            | 0             | 0        | 0              | 0       | 0    | 0                        | 0         | 0     | 0                    | 0        |
| L30        | 5               | 0               | 0              | 0              | 0                | 0                | 0         | 0          | 0            | 0             | 0        | 0              | 0       | 0    | 35                       | 0         | 0     | 0                    | 0        |
| L17        | 40              | 0               | 0              | 0              | 0                | 0                | 0         | 0          | 0            | 0             | 0        | 0              | 0       | 0    | 0                        | 0         | 0     | 0                    | 0        |
| L30        | 0               | 0               | 0              | 0              | 0                | 0                | 0         | 0          | 0            | 0             | 0        | 0              | 0       | 0    | 40                       | 0         | 0     | 0                    | 0        |
| L31        | 18              | 0               | 5              | 14             | 14               | 0                | 0         | 0          | 0            | 3             | 0        | 0              | 0       | 0    | 0                        | 0         | 0     | 0                    | 0        |
| L30        | 17              | 0               | 0              | 0              | 0                | 0                | 0         | 0          | 0            | 0             | 0        | 0              | 0       | 0    | 23                       | 0         | 0     | 0                    | 0        |
| L59        | 0               | 39              | 0              | 0              | 0                | 0                | 0         | 0          | 1            | 0             | 0        | 0              | 0       | 0    | 0                        | 0         | 0     | 0                    | 0        |
| L23        | 21              | 0               | 0              | 0              | 0                | 0                | 0         | 0          | 0            | 0             | 0        | 0              | 0       | 0    | 19                       | 0         | 0     | 0                    | 0        |
| L54        | 0               | 0               | 0              | 0              | 0                | 0                | 0         | 0          | 0            | 0             | 0        | 0              | 40      | 0    | 0                        | 0         | 0     | 0                    | 0        |
| L23        | 24              | 0               | 0              | 0              | 0                | 0                | 0         | 0          | 0            | 0             | 0        | 0              | 0       | 0    | 16                       | 0         | 0     | 0                    | 0        |
| L34        | 0               | 0               | 1              | 0              | 0                | 0                | 30        | 0          | 1            | 0             | 0        | 0              | 0       | 0    | 0                        | 0         | 0     | 0                    | 0        |
| L73        | 0               | 0               | 0              | 0              | 0                | 26               | 0         | 0          | 0            | 0             | 0        | 0              | 14      | 0    | 0                        | 0         | 0     | 0                    | 0        |
| L23        | 0               | 0               | 0              | 0              | 0                | 0                | 0         | 0          | 0            | 0             | 0        | 0              | 0       | 0    | 40                       | 0         | 0     | 0                    | 0        |
| L23        | 0               | 0               | 0              | 0              | 0                | 0                | 0         | 0          | 0            | 0             | 2        | 0              | 0       | 0    | 38                       | 0         | 0     | 0                    | 0        |
| L23        | 0               | 0               | 0              | 0              | 0                | 0                | 0         | 0          | 0            | 0             | 0        | 0              | 0       | 0    | 40                       | 0         | 0     | 0                    | 0        |
| L23        | 2               | 0               | 0              | 0              | 0                | 0                | 0         | 0          | 0            | 0             | 0        | 0              | 0       | 0    | 38                       | 0         | 0     | 0                    | 0        |
| L24        | 16              | 0               | 0              | 5              | 5                | 0                | 0         | 0          | 7            | 0             | 0        | 0              | 0       | 0    | 9                        | 0         | 1     | 0                    | 2        |
| L45        | 0               | 0               | 6              | 30             | 30               | 0                | 0         | 3          | 0            | 0             | 0        | 0              | 0       | 0    | 0                        | 0         | 0     | 0                    | 1        |
| L25        | 40              | 0               | 0              | 0              | 0                | 0                | 0         | 0          | 0            | 0             | 0        | 0              | 0       | 0    | 0                        | 0         | 0     | 0                    | 0        |
| L45        | 0               | 7               | 0              | 23             | 23               | 0                | 0         | 0          | 0            | 0             | 0        | 0              | 0       | 0    | 10                       | 0         | 0     | 0                    | 0        |
| L45        | 0               | 10              | 0              | 26             | 26               | 0                | 0         | 0          | 0            | 0             | 0        | 0              | 0       | 0    | 4                        | 0         | 0     | 0                    | 0        |
| L45        | 0               | 9               | 0              | 21             | 21               | 0                | 0         | 0          | 0            | 0             | 0        | 0              | 0       | 0    | 6                        | 0         | 0     | 0                    | 4        |
| L32        | 0               | 13              | 0              | 27             | 27               | 0                | 0         | 0          | 0            | 0             | 0        | 0              | 0       | 0    | 0                        | 0         | 0     | 0                    | 0        |
| L42        | 35              | 0               | 0              | 0              | 0                | 0                | 0         | 0          | 0            | 0             | 0        | 0              | 0       | 0    | 0                        | 0         | 0     | 0                    | 5        |
| L42        | 0               | 0               | 0              | 0              | 0                | 0                | 10        | 0          | 0            | 0             | 0        | 0              | 0       | 0    | 0                        | 0         | 0     | 0                    | 0        |
| L42        | 0               | 7               | 0              | 17             | 17               | 8                | 0         | 7          | 0            | 0             | 0        | 0              | 0       | 0    | 0                        | 0         | 0     | 0                    | 1        |
| L9         | 0               | 0               | 0              | 0              | 0                | 2                | 0         | 21         | 1            | 0             | 0        | 0              | 0       | 0    | 16                       | 0         | 0     | 0                    | 0        |
| L56        | 0               | 0               | 0              | 36             | 36               | 0                | 0         | 0          | 4            | 0             | 0        | 0              | 0       | 0    | 0                        | 0         | 0     | 0                    | 0        |
| L33        | 0               | 0               | 2              | 25             | 25               | 0                | 0         | 0          | 0            | 0             | 0        | 0              | 0       | 0    | 10                       | 0         | 0     | 0                    | 3        |
| L33        | 0               | 0               | 0              | 11             | 11               | 0                | 0         | 18         | 0            | 0             | 0        | 0              | 0       | 0    | 11                       | 0         | 0     | 0                    | 0        |
| L33        | 0               | 0               | 0              | 9              | 9                | 0                | 0         | 7          | 0            | 0             | 0        | 0              | 0       | 0    | 15                       | 0         | 0     | 0                    | 9        |
| L19        | 0               | 4               | 0              | 1              | 1                | 0                | 0         | 7          | 0            | 2             | 0        | 0              | 0       | 0    | 19                       | 0         | 0     | 0                    | 7        |
| L19        | 0               | 12              | 2              | 3              | 3                | 0                | 2         | 4          | 0            | 0             | 0        | 0              | 0       | 0    | 5                        | 0         | 0     | 0                    | 12       |
| L19        | 1               | 17              | 0              | 1              | 1                | 0                | 0         | 12         | 0            | 0             | 0        | 0              | 0       | 0    | 7                        | 0         | 0     | 0                    | 2        |
| L42        | 0               | 0               | 9              | 0              | 0                | 20               | 0         | 0          | 0            | 0             | 0        | 0              | 0       | 0    | 11                       | 0         | 0     | 0                    | 0        |
| L3         | 7               | 3               | 0              | 3              | 3                | 0                | 11        | 0          | 0            | 0             | 0        | 0              | 0       | 0    | 14                       | 0         | 0     | 0                    | 2        |
| L82        | 0               | 0               | 0              | 0              | 0                | 0                | 0         | 0          | 0            | 0             | 0        | 0              | 0       | 40   | 0                        | 0         | 0     | 0                    | 0        |
| L82        | 0               | 0               | 0              | 0              | 0                | 0                | 0         | 0          | 0            | 0             | 0        | 0              | 0       | 40   | 0                        | 0         | 0     | 0                    | 0        |
| L55        | 0               | 0               | 0              | 0              | 0                | 0                | 0         | 0          | 0            | 0             | 0        | 0              | 0       | 0    | 0                        | 0         | 0     | 0                    | 0        |
| L57        | 0               | 0               | 0              | 2              | 2                | 0                | 0         | 0          | 0            | 0             | 0        | 0              | 0       | 0    | 0                        | 0         | 2     | 0                    | 0        |
| L37        | 0               | 0               | 0              | 4              | 4                | 0                | 0         | 0          | 0            | 2             | 0        | 0              | 0       | 0    | 0                        | 0         | 0     | 0                    | 2        |
| L37        | 0               | 0               | 0              | 0              | 0                | 20               | 0         | 0          | 1            | 0             | 0        | 0              | 9       | 0    | 4                        | 0         | 0     | 0                    | 6        |
| L78        | 0               | 0               | 0              | 0              | 0                | 27               | 0         | 0          | 0            | 0             | 0        | 9              | 0       | 0    | 3                        | 0         | 0     | 0                    | 0        |
| L84        | 0               | 0               | 0              | 0              | 0                | 25               | 0         | 0          | 0            | 4             | 0        | 0              | 0       | 0    | 11                       | 0         | 0     | 0                    | 0        |
| L84        | 0               | 0               | 0              | 0              | 0                | 14               | 0         | 0          | 0            | 0             | 0        | 0              | 0       | 0    | 26                       | 0         | 0     | 0                    | 0        |
| L84        | 0               | 0               | 0              | 0              | 0                | 17               | 0         | 0          | 0            | 0             | 0        | 0              | 0       | 0    | 23                       | 0         | 0     | 0                    | 0        |
| L30        | 0               | 0               | 0              | 0              | 0                | 0                | 0         | 0          | 1            | 0             | 0        | 0              | 0       | 0    | 34                       | 0         | 0     | 0                    | 4        |
| L30        | 0               | 0               | 0              | 0              | 0                | 0                | 0         | 0          | 1            | 0             | 0        | 0              | 0       | 0    | 37                       | 0         | 0     | 0                    | 0        |
| L30        | 1               | 0               | 0              | 0              | 0                | 0                | 0         | 0          | 1            | 0             | 0        | 0              | 0       | 0    | 33                       | 0         | 0     | 0                    | 5        |
| L30        | 1               | 1               | 0              | 0              | 0                | 0                | 0         | 0          | 0            | 0             | 0        | 0              | 0       | 0    | 36                       | 0         | 0     | 0                    | 2        |
| L30        | 0               | 0               | 0              | 1              | 1                | 0                | 0         | 0          | 1            | 0             | 0        | 0              | 0       | 0    | 36                       | 0         | 0     | 0                    | 1        |
| L23        | 7               | 0               | 0              | 0              | 0                | 0                | 0         | 0          | 0            | 0             | 0        | 0              | 0       | 0    | 33                       | 0         | 0     | 0                    | 0        |
| L23        | 4               | 0               | 0              | 0              | 0                | 0                | 0         | 0          | 0            | 0             | 0        | 0              | 0       | 0    | 35                       | 0         | 0     | 0                    | 1        |
| L23        | 0               | 0               | 0              | 0              | 0                | 0                | 0         | 0          | 0            | 0             | 0        | 0              | 0       | 0    | 40                       | 0         | 0     | 0                    | 0        |
| L23        | 39              | 0               | 0              | 0              | 0                | 0                | 0         | 0          | 0            | 0             | 0        | 0              | 0       | 0    | 1                        | 0         | 0     | 0                    | 0        |
| L23        | 32              | 0               | 0              | 0              | 0                | 0                | 0         | 0          | 0            | 0             | 0        | 0              | 0       | 0    | 3                        | 0         | 0     | 0                    | 5        |
| L23        | 17              | 0               | 0              | 0              | 0                | 0                | 0         | 0          | 0            | 0             | 0        | 0              | 0       | 0    | 23                       | 0         | 0     | 0                    | 0        |
| L23        | 12              | 0               | 0              | 0              | 0                | 0                | 0         | 0          | 0            | 0             | 0        | 0              | 0       | 0    | 28                       | 0         | 0     | 0                    | 0        |
| L23        | 0               | 0               | 0              | 0              | 0                | 0                | 0         | 0          | 0            | 0             | 0        | 0              | 0       | 0    | 40                       | 0         | 0     | 0                    | 0        |
| L23        | 0               | 0               | 0              | 0              | 0                | 0                | 0         | 0          | 0            | 0             | 0        | 0              | 0       | 0    | 40                       | 0         | 0     | 0                    | 0        |
| L23        | 0               | 0               | 0              | 0              | 0                | 0                | 0         | 0          | 0            | 0             | 0        | 0              | 0       | 0    | 40                       | 0         | 0     | 0                    | 0        |
| L23        | 27              | 0               | 0              | 0              | 0                | 0                | 0         | 0          | 0            | 0             | 0        | 0              | 0       | 0    | 13                       | 0         | 0     | 0                    | 0        |
| L23        | 0               | 0               | 0              | 0              | 0                | 0                | 0         | 0          | 0            | 0             | 0        | 0              | 0       | 0    | 40                       | 0         | 0     | 0                    | 0        |
| L23        | 0               | 0               | 0              | 0              | 0                | 0                | 0         | 0          | 0            | 0             | 0        | 0              | 0       | 0    | 40                       | 0         | 0     | 0                    | 0        |
| L44        | 0               | 0               | 0              | 1              | 1                | 0                | 0         | 0          | 0            | 0             | 0        | 0              | 0       | 0    | 36                       | 0         | 0     | 0                    | 3        |
| L44        | 0               | 0               | 0              | 0              | 0                | 0                | 0         | 0          | 0            | 0             | 0        | 0              | 0       | 0    | 40                       | 0         | 0     | 0                    | 0        |
| L44        | 2               | 0               | 0              | 0              | 0                | 0                | 0         | 0          | 0            | 0             | 0        | 0              | 0       | 0    | 37                       | 0         | 0     | 0                    | 1        |
| L44        | 0               | 0               | 0              | 1              | 1                | 0                | 0         | 0          | 0            | 0             | 0        | 0              | 0       | 0    | 28                       | 0         | 0     | 0                    | 11       |
| L44        | 2               | 0               | 0              | 0              | 0                | 0                |           |            |              |               |          |                |         |      |                          |           |       |                      |          |

| Species ID | micro-crustacea | macro-crustacea | micro-bivalvia | macro-bivalvia | micro-gastropoda | macro-gastropoda | Brachyura | Polychaeta | Foraminifera | Echinodermata | Copepoda | gnathid Isopod | Anomura | fish | amorphous organic matter | Black AOM | algae | coral organic matter | sediment |
|------------|-----------------|-----------------|----------------|----------------|------------------|------------------|-----------|------------|--------------|---------------|----------|----------------|---------|------|--------------------------|-----------|-------|----------------------|----------|
| L34        | 0               | 0               | 0              | 0              | 0                | 0                | 0         | 0          | 0            | 0             | 0        | 0              | 0       | 40   | 0                        | 0         | 0     | 0                    | 0        |
| L34        | 0               | 40              | 0              | 0              | 0                | 0                | 0         | 0          | 0            | 0             | 0        | 0              | 0       | 0    | 0                        | 0         | 0     | 0                    | 0        |
| L13        | 0               | 21              | 0              | 0              | 0                | 0                | 12        | 0          | 0            | 7             | 0        | 0              | 0       | 0    | 0                        | 0         | 0     | 0                    | 0        |
| L58        | 22              | 0               | 0              | 0              | 0                | 0                | 0         | 0          | 0            | 0             | 0        | 0              | 0       | 0    | 12                       | 0         | 0     | 0                    | 0        |
| L84        | 0               | 0               | 0              | 0              | 0                | 13               | 0         | 7          | 0            | 0             | 0        | 0              | 0       | 0    | 20                       | 0         | 0     | 0                    | 0        |
| L84        | 0               | 0               | 0              | 0              | 0                | 37               | 0         | 0          | 0            | 0             | 0        | 0              | 0       | 0    | 0                        | 0         | 0     | 0                    | 0        |
| L39        | 0               | 0               | 0              | 0              | 0                | 0                | 40        | 0          | 0            | 0             | 0        | 0              | 0       | 0    | 0                        | 0         | 0     | 0                    | 0        |
| L18        | 0               | 0               | 0              | 3              | 3                | 3                | 0         | 6          | 1            | 1             | 0        | 0              | 0       | 0    | 14                       | 0         | 2     | 0                    | 10       |
| L54        | 0               | 16              | 0              | 0              | 0                | 0                | 11        | 0          | 0            | 0             | 0        | 0              | 0       | 0    | 13                       | 0         | 0     | 0                    | 0        |
| L14        | 23              | 11              | 0              | 0              | 0                | 0                | 0         | 0          | 0            | 0             | 3        | 0              | 0       | 0    | 0                        | 0         | 0     | 0                    | 3        |
| L33        | 0               | 6               | 0              | 3              | 3                | 3                | 0         | 0          | 0            | 0             | 0        | 0              | 0       | 0    | 20                       | 0         | 0     | 0                    | 8        |
| L13        | 21              | 0               | 0              | 0              | 0                | 0                | 0         | 0          | 0            | 0             | 0        | 0              | 0       | 0    | 17                       | 0         | 2     | 0                    | 0        |
| L3         | 21              | 8               | 0              | 3              | 3                | 0                | 2         | 0          | 0            | 0             | 0        | 0              | 0       | 0    | 0                        | 0         | 0     | 0                    | 6        |
| L71        | 0               | 0               | 0              | 0              | 0                | 0                | 0         | 0          | 0            | 0             | 0        | 0              | 0       | 40   | 0                        | 0         | 0     | 0                    | 0        |
| L24        | 0               | 33              | 0              | 4              | 4                | 0                | 0         | 0          | 0            | 0             | 0        | 0              | 0       | 0    | 2                        | 0         | 0     | 0                    | 1        |
| L24        | 0               | 0               | 0              | 2              | 2                | 0                | 0         | 4          | 0            | 0             | 0        | 0              | 0       | 0    | 0                        | 0         | 0     | 0                    | 34       |
| L86        | 0               | 0               | 0              | 0              | 0                | 0                | 0         | 0          | 0            | 0             | 0        | 0              | 0       | 0    | 7                        | 0         | 0     | 33                   | 0        |
| L86        | 0               | 0               | 0              | 0              | 0                | 0                | 0         | 0          | 0            | 0             | 0        | 0              | 0       | 0    | 6                        | 0         | 0     | 32                   | 2        |
| L58        | 22              | 0               | 2              | 3              | 3                | 0                | 0         | 0          | 0            | 0             | 0        | 0              | 0       | 0    | 13                       | 0         | 0     | 0                    | 0        |
| L50        | 0               | 0               | 0              | 0              | 0                | 0                | 0         | 0          | 0            | 0             | 0        | 0              | 0       | 32   | 8                        | 0         | 0     | 0                    | 0        |
| L50        | 0               | 3               | 0              | 0              | 0                | 0                | 0         | 0          | 0            | 0             | 0        | 0              | 0       | 0    | 33                       | 0         | 0     | 0                    | 0        |
| L50        | 0               | 7               | 2              | 0              | 0                | 0                | 6         | 0          | 0            | 0             | 0        | 0              | 0       | 0    | 3                        | 0         | 0     | 0                    | 22       |
| L37        | 0               | 7               | 0              | 22             | 22               | 9                | 0         | 0          | 0            | 0             | 0        | 0              | 0       | 0    | 0                        | 0         | 0     | 0                    | 2        |
| L49        | 0               | 0               | 0              | 0              | 0                | 0                | 0         | 0          | 0            | 0             | 0        | 0              | 0       | 0    | 0                        | 40        | 0     | 0                    | 0        |
| L35        | 0               | 0               | 0              | 0              | 0                | 0                | 9         | 0          | 0            | 0             | 0        | 0              | 0       | 0    | 31                       | 0         | 0     | 0                    | 0        |
| L42        | 0               | 0               | 0              | 0              | 0                | 0                | 0         | 0          | 0            | 0             | 0        | 0              | 0       | 0    | 12                       | 0         | 0     | 0                    | 28       |
| L42        | 0               | 0               | 0              | 19             | 19               | 0                | 0         | 0          | 0            | 0             | 0        | 0              | 0       | 0    | 9                        | 0         | 0     | 0                    | 12       |
| L42        | 9               | 0               | 0              | 0              | 0                | 0                | 0         | 0          | 0            | 0             | 0        | 0              | 0       | 0    | 25                       | 0         | 0     | 0                    | 6        |
| L33        | 0               | 0               | 0              | 3              | 3                | 0                | 0         | 0          | 0            | 0             | 0        | 0              | 0       | 0    | 37                       | 0         | 0     | 0                    | 0        |
| L33        | 0               | 0               | 9              | 2              | 2                | 0                | 15        | 3          | 0            | 0             | 0        | 0              | 0       | 0    | 0                        | 0         | 0     | 0                    | 11       |
| L33        | 39              | 0               | 1              | 0              | 0                | 0                | 0         | 0          | 0            | 0             | 0        | 0              | 0       | 0    | 0                        | 0         | 0     | 0                    | 0        |
| L24        | 3               | 0               | 0              | 0              | 0                | 0                | 0         | 0          | 8            | 0             | 0        | 0              | 0       | 0    | 27                       | 0         | 0     | 0                    | 2        |
| L7         | 0               | 0               | 0              | 1              | 1                | 0                | 0         | 0          | 0            | 0             | 0        | 0              | 0       | 0    | 32                       | 0         | 7     | 0                    | 0        |
| L7         | 0               | 0               | 0              | 1              | 1                | 0                | 0         | 0          | 0            | 0             | 0        | 0              | 0       | 0    | 39                       | 0         | 0     | 0                    | 0        |
| L68        | 0               | 0               | 0              | 0              | 0                | 0                | 0         | 2          | 0            | 0             | 0        | 0              | 0       | 0    | 18                       | 0         | 0     | 0                    | 20       |
| L33        | 0               | 0               | 19             | 3              | 3                | 0                | 0         | 0          | 0            | 18            | 0        | 0              | 0       | 0    | 0                        | 0         | 0     | 0                    | 0        |
| L76        | 0               | 0               | 0              | 0              | 0                | 24               | 0         | 0          | 0            | 14            | 0        | 0              | 0       | 0    | 0                        | 0         | 0     | 0                    | 0        |
| L67        | 0               | 0               | 0              | 0              | 0                | 0                | 0         | 0          | 0            | 14            | 0        | 0              | 0       | 0    | 0                        | 0         | 0     | 0                    | 12       |
| L67        | 0               | 0               | 0              | 0              | 0                | 1                | 0         | 0          | 0            | 0             | 0        | 0              | 0       | 24   | 0                        | 0         | 0     | 0                    | 0        |
| L67        | 0               | 0               | 0              | 0              | 0                | 1                | 0         | 0          | 10           | 0             | 0        | 0              | 0       | 0    | 5                        | 0         | 0     | 0                    | 0        |
| L67        | 0               | 0               | 0              | 0              | 0                | 0                | 0         | 0          | 0            | 0             | 0        | 0              | 0       | 40   | 0                        | 0         | 0     | 0                    | 0        |
| L67        | 0               | 0               | 0              | 0              | 0                | 9                | 0         | 0          | 0            | 0             | 0        | 0              | 0       | 31   | 0                        | 0         | 0     | 0                    | 0        |
| L40        | 0               | 0               | 0              | 0              | 0                | 0                | 0         | 0          | 0            | 0             | 0        | 0              | 0       | 0    | 29                       | 0         | 0     | 0                    | 0        |
| L22        | 26              | 0               | 0              | 7              | 7                | 0                | 0         | 0          | 2            | 2             | 0        | 0              | 0       | 0    | 3                        | 0         | 0     | 0                    | 0        |
| L68        | 6               | 0               | 0              | 3              | 3                | 0                | 0         | 14         | 0            | 0             | 0        | 0              | 0       | 0    | 0                        | 0         | 0     | 0                    | 17       |
| L27        | 18              | 0               | 0              | 8              | 8                | 0                | 0         | 0          | 0            | 0             | 0        | 0              | 0       | 0    | 8                        | 0         | 0     | 0                    | 6        |
| L18        | 21              | 0               | 0              | 0              | 0                | 0                | 0         | 0          | 0            | 0             | 0        | 0              | 0       | 0    | 14                       | 0         | 0     | 0                    | 5        |
| L27        | 0               | 0               | 0              | 13             | 13               | 0                | 0         | 0          | 0            | 0             | 0        | 0              | 0       | 0    | 14                       | 0         | 0     | 0                    | 6        |
| L84        | 0               | 27              | 0              | 4              | 4                | 0                | 7         | 0          | 0            | 0             | 0        | 0              | 0       | 0    | 0                        | 0         | 0     | 0                    | 2        |
| L32        | 9               | 4               | 0              | 20             | 20               | 0                | 0         | 0          | 0            | 0             | 0        | 0              | 0       | 0    | 7                        | 0         | 0     | 0                    | 0        |
| L14        | 25              | 3               | 0              | 9              | 9                | 0                | 0         | 0          | 0            | 2             | 0        | 0              | 0       | 0    | 0                        | 0         | 0     | 0                    | 1        |
| L14        | 33              | 4               | 0              | 0              | 0                | 0                | 3         | 0          | 0            | 0             | 0        | 0              | 0       | 0    | 0                        | 0         | 0     | 0                    | 0        |
| L41        | 21              | 0               | 0              | 9              | 9                | 10               | 0         | 0          | 0            | 0             | 0        | 0              | 0       | 0    | 0                        | 0         | 0     | 0                    | 0        |
| L68        | 3               | 0               | 0              | 7              | 7                | 0                | 0         | 3          | 0            | 0             | 0        | 0              | 0       | 0    | 0                        | 0         | 0     | 0                    | 27       |
| L68        | 0               | 0               | 0              | 3              | 3                | 0                | 0         | 0          | 0            | 0             | 0        | 0              | 0       | 0    | 9                        | 0         | 0     | 0                    | 28       |
| L68        | 0               | 0               | 0              | 10             | 10               | 0                | 0         | 9          | 0            | 0             | 0        | 0              | 0       | 0    | 7                        | 0         | 0     | 0                    | 10       |
| L68        | 0               | 0               | 0              | 6              | 6                | 0                | 0         | 7          | 0            | 0             | 0        | 0              | 0       | 0    | 0                        | 0         | 0     | 0                    | 27       |
| L68        | 6               | 0               | 0              | 2              | 2                | 0                | 0         | 3          | 0            | 0             | 0        | 0              | 0       | 0    | 3                        | 0         | 0     | 0                    | 26       |
| L68        | 0               | 0               | 0              | 40             | 40               | 0                | 0         | 0          | 0            | 0             | 0        | 0              | 0       | 0    | 0                        | 0         | 0     | 0                    | 0        |
| L68        | 0               | 0               | 0              | 9              | 9                | 0                | 0         | 6          | 0            | 0             | 0        | 0              | 0       | 0    | 8                        | 0         | 0     | 0                    | 17       |
| L54        | 0               | 0               | 0              | 0              | 0                | 0                | 40        | 0          | 0            | 0             | 0        | 0              | 0       | 0    | 0                        | 0         | 0     | 0                    | 0        |
| L54        | 0               | 0               | 0              | 0              | 0                | 0                | 34        | 0          | 0            | 0             | 0        | 0              | 0       | 0    | 6                        | 0         | 0     | 0                    | 0        |
| L54        | 0               | 36              | 0              | 0              | 0                | 0                | 0         | 0          | 0            | 0             | 0        | 0              | 0       | 0    | 0                        | 0         | 0     | 0                    | 0        |
| L54        | 0               | 0               | 0              | 1              | 1                | 0                | 39        | 0          | 0            | 0             | 0        | 0              | 0       | 0    | 0                        | 0         | 0     | 0                    | 0        |
| L54        | 0               | 0               | 0              | 0              | 0                | 0                | 40        | 0          | 0            | 0             | 0        | 0              | 0       | 0    | 0                        | 0         | 0     | 0                    | 0        |
| L48        | 0               | 37              | 0              | 2              | 2                | 0                | 0         | 0          | 0            | 0             | 0        | 0              | 0       | 0    | 0                        | 0         | 0     | 0                    | 1        |
| L18        | 0               | 24              | 0              | 1              | 1                | 0                | 11        | 0          | 0            | 0             | 0        | 0              | 0       | 0    | 4                        | 0         | 0     | 0                    | 0        |
| L18        | 0               | 24              | 0              | 3              | 3                | 0                | 5         | 0          | 0            | 0             | 0        | 0              | 0       | 0    | 6                        | 0         | 0     | 0                    | 2        |
| L18        | 0               | 14              | 0              | 1              | 1                | 0                | 0         | 16         | 0            | 0             | 0        | 0              | 0       | 0    | 3                        | 0         | 0     | 0                    | 6        |
| L16        | 26              | 0               | 0              | 0              | 0                | 0                | 0         | 0          | 0            | 12            | 0        | 0              | 0       | 0    | 0                        | 0         | 0     | 0                    | 0        |
| L16        | 8               | 0               | 0              | 0              | 0                | 0                | 0         | 0          | 0            | 32            | 0        | 0              | 0       | 0    | 0                        | 0         | 0     | 0                    | 0        |
| L16        | 18              | 0               | 0              | 0              | 0                | 0                | 0         | 0          | 0            | 22            | 0        | 0              | 0       | 0    | 0                        | 0         | 0     | 0                    | 0        |
| L16        | 16              | 0               | 0              | 0              | 0                | 0                | 0         | 0          | 0            | 24            | 0        | 0              | 0       | 0    | 0                        | 0         | 0     | 0                    | 0        |
| L49        | 26              | 0               | 0              | 0              | 0                | 0                | 0         | 0          | 0            | 0             | 0        | 0              | 0       | 0    | 14                       | 0         | 0     | 0                    | 0        |
| L49        | 38              | 1               | 0              | 0              | 0                | 0                | 0         | 0          | 0            | 0             | 0        | 0              | 0       | 0    | 0                        | 0         | 0     | 0                    | 0        |
| L49        | 0               | 0               | 0              | 0              | 0                | 0                | 0         | 0          | 0            | 0             | 0        | 0              | 0       | 0    | 0                        | 40        | 0     | 0                    | 0        |
| L49        | 0               | 0               | 0              | 0              | 0                | 0                | 0         | 0          | 0            | 0             | 0        | 0              | 0       | 0    | 27                       | 9         | 0     | 0                    | 0        |
| L87        | 0               | 0               | 0              | 0              | 0                | 0                | 0         | 0          | 0            | 0             | 0        | 0              | 0       | 0    | 0                        | 0         | 0     | 40                   | 0        |
| L50        | 0               | 40              | 0              | 0              | 0                | 0                | 0         | 0          | 0            | 0             | 0        | 0              | 0       | 0    | 0                        | 0         | 0     | 0                    | 0        |
| L50        | 0               | 0               | 0              | 0              | 0                | 0                | 0         | 0          | 0            | 0             | 0        | 0              | 0       | 0    | 0                        | 0         | 0     | 0                    | 0        |
| L94        | 0               | 0               | 0              | 0              | 0                | 8                | 0         | 0          | 0            | 0             | 0        | 0              | 0       | 0    | 3                        | 0         | 0     | 0                    | 11       |
| L42        | 3               | 0               | 0              | 34             | 34               | 0                | 0         | 0          | 0            | 0             | 0        | 0              | 0       | 0    | 3                        | 0         | 0     | 0                    | 0        |
| L42        | 2               | 1               | 0              | 36             | 36               | 0                | 0         | 0          | 0            | 0             | 0        | 0              | 0       | 0    | 0                        | 0         | 0     | 0                    | 1        |
| L42        | 1               | 0               | 0              | 39             | 39               | 0                | 0         | 0          | 0            | 0             | 0        | 0              | 0       | 0    | 0                        | 0         | 0     | 0                    | 0        |
| L42        | 9               | 0               | 0              | 30             | 30               | 0                | 0         | 1          | 0            | 0             | 0        | 0              | 0       | 0    | 0                        | 0         | 0     | 0                    | 0        |
| L41        | 0               | 0               | 0              | 0              | 0                | 10               | 30        | 0          | 0            | 0             | 0        | 0              | 0       | 0    | 0                        | 0         | 0     | 0                    | 0        |
| L41        | 0               | 30              | 0              | 10             | 10               | 0                | 0         | 0          | 0            | 0             | 0        | 0              | 0       | 0    | 0                        | 0         | 0     | 0                    | 0        |
| L41        | 0               | 4               | 3              | 1              | 1                | 0                | 0         | 0          | 0            | 0             | 0        | 0              | 0       | 0    | 0                        | 0         | 0     | 0                    | 32       |
| L41        | 0               | 15              | 2              | 9              | 9                | 0                | 0         | 0          | 0            | 0             | 0        | 0              | 0       | 0    | 0                        | 0         | 0     | 0                    | 7        |
| L41        | 0               | 20              | 3              | 1              | 1                | 0                | 0         | 0          | 0            | 0             | 0        | 0              | 0       | 0    | 0                        | 0         | 0     | 0                    | 16       |
| L41        | 0               | 13              | 9              | 1              | 1                | 0                | 0         | 0          | 0            | 0             | 0        | 0              | 0       | 0    | 0                        | 0         | 0     | 0                    | 17       |
| L63        | 0               | 14              | 11             | 0              | 0                | 8                | 0         | 0          | 7            | 0             | 0        | 0              | 0       | 0    | 0                        | 0         | 0     | 0                    | 0        |
| L63        | 0               | 0               | 5              | 0              | 0                | 0                | 7         | 0          | 0            | 0             | 0        | 0              | 0       | 0    | 28                       | 0         | 0     | 0                    | 0        |
| L63        | 0               | 9               | 0              | 9              | 9                | 0                | 0         | 0          | 0            | 0             | 0        | 0              | 0       | 22   | 0                        | 0         | 0     | 0                    | 0        |
| L63        | 0               | 0               | 0              | 40             | 40               | 0                | 0         | 0          | 0            | 0             | 0        | 0              | 0       | 0    | 0                        | 0         | 0     | 0                    | 0        |
| L66        | 0               | 0               | 0              | 0              |                  |                  |           |            |              |               |          |                |         |      |                          |           |       |                      |          |



| Species ID | micro-crustacea | macro-crustacea | micro-bivalvia | macro-bivalvia | micro-gastropoda | macro-gastropoda | Brachyura | Polychaeta | Foraminifera | Echinodermata | Copepoda | gnathid Isopod | Anomura | fish | amorphous organic matter | Black AOM | algae | coral organic matter | sediment |
|------------|-----------------|-----------------|----------------|----------------|------------------|------------------|-----------|------------|--------------|---------------|----------|----------------|---------|------|--------------------------|-----------|-------|----------------------|----------|
| L63        | 0               | 0               | 0              | 0              | 0                | 0                | 0         | 0          | 0            | 0             | 0        | 0              | 0       | 0    | 40                       | 0         | 0     | 0                    | 0        |
| L64        | 0               | 0               | 0              | 0              | 0                | 0                | 0         | 0          | 0            | 0             | 0        | 0              | 40      | 0    | 0                        | 0         | 0     | 0                    | 0        |
| L22        | 26              | 3               | 4              | 0              | 0                | 0                | 0         | 0          | 0            | 0             | 0        | 0              | 0       | 0    | 0                        | 0         | 0     | 0                    | 3        |
| L49        | 0               | 9               | 0              | 0              | 0                | 0                | 0         | 0          | 0            | 0             | 0        | 0              | 0       | 0    | 31                       | 0         | 0     | 0                    | 0        |
| L49        | 0               | 0               | 0              | 0              | 0                | 0                | 0         | 0          | 0            | 0             | 0        | 0              | 0       | 0    | 0                        | 0         | 0     | 0                    | 0        |
| L49        | 0               | 0               | 0              | 0              | 0                | 0                | 0         | 0          | 0            | 0             | 0        | 0              | 0       | 0    | 37                       | 0         | 0     | 0                    | 0        |
| L49        | 0               | 0               | 0              | 0              | 0                | 0                | 0         | 0          | 0            | 0             | 0        | 0              | 0       | 0    | 40                       | 0         | 0     | 0                    | 0        |
| L49        | 0               | 0               | 0              | 0              | 0                | 0                | 0         | 0          | 0            | 0             | 0        | 0              | 0       | 0    | 0                        | 40        | 0     | 0                    | 0        |
| L49        | 0               | 0               | 0              | 0              | 0                | 0                | 0         | 0          | 0            | 0             | 0        | 0              | 0       | 0    | 26                       | 14        | 0     | 0                    | 0        |
| L40        | 0               | 0               | 0              | 0              | 0                | 0                | 0         | 0          | 0            | 0             | 1        | 26             | 0       | 0    | 6                        | 0         | 0     | 0                    | 0        |
| L40        | 7               | 0               | 0              | 0              | 0                | 0                | 0         | 0          | 0            | 0             | 14       | 0              | 0       | 0    | 12                       | 0         | 0     | 0                    | 0        |
| L40        | 1               | 0               | 0              | 0              | 0                | 0                | 0         | 0          | 0            | 0             | 0        | 0              | 0       | 0    | 34                       | 0         | 0     | 0                    | 0        |
| L40        | 0               | 30              | 0              | 0              | 0                | 0                | 0         | 0          | 0            | 0             | 0        | 0              | 0       | 0    | 6                        | 0         | 0     | 0                    | 0        |
| L40        | 7               | 0               | 0              | 0              | 0                | 0                | 0         | 0          | 0            | 0             | 0        | 0              | 0       | 0    | 16                       | 0         | 0     | 0                    | 0        |
| L40        | 3               | 0               | 0              | 0              | 0                | 0                | 0         | 0          | 0            | 0             | 0        | 0              | 0       | 0    | 6                        | 0         | 0     | 0                    | 0        |
| L67        | 13              | 0               | 0              | 0              | 0                | 0                | 27        | 0          | 0            | 0             | 0        | 0              | 0       | 0    | 0                        | 0         | 0     | 0                    | 0        |
| L40        | 23              | 0               | 0              | 0              | 0                | 0                | 0         | 0          | 0            | 0             | 0        | 12             | 0       | 0    | 5                        | 0         | 0     | 0                    | 0        |
| L38        | 11              | 0               | 28             | 1              | 1                | 0                | 0         | 0          | 0            | 0             | 0        | 0              | 0       | 0    | 0                        | 0         | 0     | 0                    | 0        |
| L40        | 27              | 3               | 0              | 0              | 0                | 0                | 0         | 0          | 0            | 0             | 3        | 0              | 0       | 0    | 7                        | 0         | 0     | 0                    | 0        |
| L38        | 0               | 0               | 0              | 33             | 33               | 0                | 7         | 0          | 0            | 0             | 0        | 0              | 0       | 0    | 0                        | 0         | 0     | 0                    | 0        |
| L40        | 0               | 0               | 0              | 0              | 0                | 0                | 0         | 0          | 0            | 0             | 0        | 0              | 0       | 0    | 39                       | 0         | 0     | 0                    | 0        |
| L86        | 0               | 0               | 0              | 0              | 0                | 0                | 0         | 0          | 0            | 0             | 0        | 0              | 0       | 0    | 0                        | 0         | 0     | 40                   | 0        |
| L40        | 18              | 0               | 0              | 0              | 0                | 0                | 0         | 0          | 0            | 0             | 0        | 0              | 0       | 0    | 11                       | 11        | 0     | 0                    | 0        |
| L86        | 0               | 0               | 0              | 0              | 0                | 0                | 0         | 0          | 0            | 0             | 0        | 0              | 0       | 0    | 0                        | 0         | 0     | 40                   | 0        |
| L40        | 0               | 0               | 0              | 0              | 0                | 0                | 0         | 0          | 0            | 0             | 0        | 0              | 0       | 0    | 24                       | 16        | 0     | 0                    | 0        |
| L13        | 39              | 1               | 0              | 0              | 0                | 0                | 0         | 0          | 0            | 0             | 0        | 0              | 0       | 0    | 0                        | 0         | 0     | 0                    | 0        |
| L7         | 7               | 0               | 4              | 0              | 0                | 0                | 0         | 0          | 0            | 0             | 0        | 0              | 0       | 0    | 3                        | 0         | 0     | 0                    | 26       |
| L74        | 0               | 40              | 0              | 0              | 0                | 0                | 0         | 0          | 0            | 0             | 0        | 0              | 0       | 0    | 0                        | 0         | 0     | 0                    | 0        |
| L7         | 21              | 1               | 0              | 2              | 2                | 0                | 0         | 0          | 0            | 0             | 0        | 0              | 0       | 0    | 6                        | 0         | 0     | 0                    | 10       |
| L7         | 33              | 0               | 0              | 0              | 0                | 0                | 0         | 0          | 0            | 0             | 0        | 0              | 0       | 0    | 7                        | 0         | 0     | 0                    | 0        |
| L7         | 31              | 0               | 0              | 2              | 2                | 0                | 0         | 2          | 0            | 0             | 0        | 0              | 0       | 0    | 3                        | 0         | 0     | 0                    | 2        |
| L7         | 22              | 0               | 0              | 0              | 0                | 0                | 0         | 0          | 8            | 0             | 0        | 0              | 0       | 0    | 7                        | 0         | 0     | 0                    | 3        |
| L7         | 33              | 0               | 2              | 0              | 0                | 0                | 0         | 2          | 0            | 0             | 0        | 0              | 0       | 0    | 3                        | 0         | 0     | 0                    | 0        |
| L7         | 0               | 0               | 0              | 0              | 0                | 0                | 40        | 0          | 0            | 0             | 0        | 0              | 0       | 0    | 0                        | 0         | 0     | 0                    | 0        |
| L7         | 3               | 0               | 0              | 0              | 0                | 0                | 0         | 2          | 0            | 0             | 0        | 0              | 0       | 0    | 20                       | 0         | 0     | 0                    | 15       |
| L7         | 14              | 0               | 0              | 0              | 0                | 0                | 0         | 0          | 0            | 0             | 0        | 0              | 0       | 0    | 21                       | 0         | 0     | 0                    | 5        |
| L7         | 0               | 0               | 0              | 0              | 0                | 0                | 40        | 0          | 0            | 0             | 0        | 0              | 0       | 0    | 0                        | 0         | 0     | 0                    | 0        |
| L7         | 36              | 0               | 0              | 3              | 3                | 0                | 0         | 0          | 0            | 0             | 0        | 0              | 0       | 0    | 0                        | 0         | 0     | 0                    | 1        |
| L7         | 0               | 27              | 0              | 0              | 0                | 0                | 0         | 0          | 0            | 0             | 0        | 0              | 0       | 0    | 6                        | 0         | 0     | 0                    | 7        |
| L18        | 0               | 0               | 0              | 0              | 0                | 0                | 0         | 40         | 0            | 0             | 0        | 0              | 0       | 0    | 0                        | 0         | 0     | 0                    | 0        |
| L7         | 22              | 7               | 0              | 0              | 0                | 0                | 0         | 5          | 0            | 0             | 0        | 0              | 0       | 0    | 6                        | 0         | 0     | 0                    | 0        |
| L78        | 0               | 0               | 0              | 0              | 0                | 40               | 0         | 0          | 0            | 0             | 0        | 0              | 0       | 0    | 0                        | 0         | 0     | 0                    | 0        |
| L7         | 37              | 0               | 0              | 0              | 0                | 0                | 0         | 0          | 0            | 0             | 0        | 0              | 0       | 0    | 0                        | 0         | 0     | 0                    | 3        |
| L7         | 0               | 0               | 0              | 0              | 0                | 0                | 38        | 0          | 0            | 0             | 0        | 0              | 0       | 0    | 2                        | 0         | 0     | 0                    | 0        |
| L7         | 40              | 0               | 0              | 0              | 0                | 0                | 0         | 0          | 0            | 0             | 0        | 0              | 0       | 0    | 0                        | 0         | 0     | 0                    | 0        |
| L7         | 32              | 0               | 0              | 0              | 0                | 0                | 0         | 0          | 0            | 0             | 0        | 0              | 0       | 0    | 7                        | 0         | 0     | 0                    | 1        |
| L77        | 0               | 0               | 0              | 0              | 0                | 25               | 0         | 0          | 0            | 0             | 0        | 0              | 0       | 0    | 12                       | 0         | 0     | 0                    | 3        |
| L77        | 0               | 0               | 0              | 0              | 0                | 37               | 0         | 0          | 0            | 0             | 0        | 0              | 0       | 0    | 3                        | 0         | 0     | 0                    | 0        |
| L77        | 0               | 0               | 0              | 0              | 0                | 3                | 31        | 0          | 0            | 0             | 0        | 0              | 0       | 0    | 0                        | 0         | 0     | 0                    | 0        |
| L87        | 0               | 0               | 0              | 0              | 0                | 0                | 9         | 4          | 0            | 0             | 0        | 0              | 0       | 0    | 0                        | 0         | 0     | 40                   | 0        |
| L77        | 0               | 0               | 0              | 0              | 0                | 7                | 3         | 0          | 0            | 0             | 0        | 0              | 0       | 0    | 6                        | 0         | 0     | 0                    | 7        |
| L77        | 0               | 0               | 0              | 0              | 0                | 3                | 11        | 7          | 0            | 0             | 0        | 0              | 2       | 0    | 6                        | 0         | 0     | 40                   | 0        |
| L79        | 0               | 19              | 0              | 0              | 0                | 0                | 0         | 0          | 21           | 0             | 0        | 0              | 0       | 0    | 0                        | 0         | 0     | 0                    | 0        |
| L77        | 0               | 0               | 0              | 0              | 0                | 4                | 3         | 0          | 0            | 0             | 0        | 2              | 0       | 0    | 5                        | 0         | 0     | 0                    | 5        |
| L79        | 0               | 0               | 0              | 0              | 0                | 0                | 0         | 0          | 39           | 0             | 0        | 0              | 1       | 0    | 0                        | 0         | 0     | 0                    | 0        |
| L77        | 0               | 0               | 0              | 0              | 0                | 0                | 40        | 0          | 0            | 0             | 0        | 0              | 0       | 0    | 0                        | 0         | 0     | 0                    | 0        |
| L79        | 0               | 0               | 0              | 8              | 8                | 0                | 0         | 0          | 32           | 0             | 0        | 0              | 0       | 0    | 0                        | 0         | 0     | 0                    | 0        |
| L65        | 0               | 0               | 0              | 0              | 0                | 0                | 0         | 0          | 0            | 0             | 0        | 0              | 40      | 0    | 0                        | 0         | 0     | 0                    | 0        |
| L65        | 0               | 36              | 2              | 0              | 0                | 0                | 0         | 0          | 0            | 0             | 0        | 2              | 0       | 0    | 0                        | 0         | 0     | 0                    | 0        |
| L66        | 0               | 0               | 0              | 0              | 0                | 0                | 0         | 0          | 0            | 0             | 0        | 0              | 0       | 0    | 0                        | 0         | 0     | 0                    | 0        |
| L65        | 0               | 0               | 0              | 0              | 0                | 0                | 0         | 0          | 7            | 0             | 0        | 29             | 0       | 0    | 4                        | 0         | 0     | 0                    | 0        |
| L66        | 0               | 0               | 0              | 0              | 0                | 0                | 0         | 0          | 0            | 0             | 0        | 0              | 0       | 0    | 0                        | 0         | 0     | 40                   | 0        |
| L65        | 0               | 0               | 7              | 0              | 0                | 0                | 0         | 0          | 0            | 0             | 0        | 0              | 0       | 33   | 0                        | 0         | 0     | 0                    | 0        |
| L65        | 0               | 16              | 0              | 3              | 3                | 0                | 0         | 0          | 0            | 0             | 0        | 0              | 0       | 0    | 21                       | 0         | 0     | 0                    | 0        |
| L65        | 0               | 40              | 0              | 0              | 0                | 0                | 0         | 0          | 0            | 0             | 0        | 0              | 0       | 0    | 0                        | 0         | 0     | 0                    | 0        |
| L65        | 0               | 7               | 0              | 0              | 0                | 0                | 0         | 0          | 0            | 33            | 0        | 0              | 0       | 0    | 0                        | 0         | 0     | 0                    | 0        |
| L76        | 0               | 0               | 0              | 3              | 3                | 13               | 18        | 0          | 0            | 0             | 0        | 0              | 0       | 0    | 6                        | 0         | 0     | 0                    | 0        |
| L73        | 0               | 0               | 0              | 0              | 0                | 34               | 0         | 0          | 0            | 0             | 0        | 0              | 0       | 0    | 6                        | 0         | 0     | 0                    | 0        |
| L73        | 0               | 0               | 0              | 14             | 14               | 0                | 0         | 0          | 0            | 0             | 0        | 0              | 0       | 0    | 0                        | 0         | 0     | 0                    | 26       |
| L82        | 0               | 40              | 0              | 0              | 0                | 0                | 0         | 0          | 0            | 0             | 0        | 0              | 0       | 0    | 0                        | 0         | 0     | 0                    | 0        |
| L82        | 0               | 0               | 0              | 0              | 0                | 0                | 0         | 0          | 0            | 0             | 0        | 0              | 0       | 28   | 12                       | 0         | 0     | 0                    | 0        |
| L82        | 0               | 0               | 0              | 0              | 0                | 40               | 0         | 0          | 0            | 0             | 0        | 0              | 0       | 0    | 0                        | 0         | 0     | 0                    | 0        |
| L47        | 0               | 0               | 13             | 6              | 6                | 0                | 0         | 0          | 0            | 0             | 0        | 0              | 0       | 0    | 6                        | 0         | 6     | 0                    | 9        |
| L47        | 0               | 0               | 17             | 13             | 13               | 0                | 0         | 4          | 0            | 0             | 0        | 0              | 0       | 0    | 0                        | 0         | 0     | 0                    | 6        |
| L67        | 0               | 24              | 0              | 0              | 0                | 16               | 0         | 0          | 0            | 0             | 0        | 0              | 0       | 0    | 0                        | 0         | 0     | 0                    | 0        |
| L82        | 0               | 0               | 0              | 0              | 0                | 0                | 0         | 0          | 0            | 0             | 0        | 0              | 0       | 40   | 0                        | 0         | 0     | 0                    | 0        |
| L67        | 0               | 0               | 0              | 0              | 0                | 40               | 0         | 0          | 0            | 0             | 0        | 0              | 0       | 0    | 0                        | 0         | 0     | 0                    | 0        |
| L82        | 0               | 0               | 0              | 0              | 0                | 0                | 0         | 0          | 0            | 0             | 0        | 0              | 0       | 40   | 0                        | 0         | 0     | 0                    | 0        |
| L67        | 0               | 0               | 0              | 0              | 0                | 0                | 0         | 0          | 29           | 0             | 0        | 0              | 0       | 0    | 0                        | 0         | 2     | 0                    | 0        |
| L82        | 0               | 0               | 0              | 0              | 0                | 0                | 0         | 0          | 0            | 0             | 0        | 0              | 0       | 40   | 0                        | 0         | 0     | 0                    | 0        |
| L82        | 0               | 0               | 0              | 0              | 0                | 0                | 40        | 0          | 0            | 0             | 0        | 0              | 0       | 0    | 0                        | 0         | 0     | 0                    | 0        |
| L82        | 0               | 0               | 0              | 0              | 0                | 0                | 40        | 0          | 0            | 0             | 0        | 0              | 0       | 0    | 0                        | 0         | 0     | 0                    | 0        |
| L82        | 0               | 40              | 0              | 0              | 0                | 0                | 0         | 0          | 0            | 0             | 0        | 0              | 0       | 0    | 0                        | 0         | 0     | 0                    | 0        |
| L82        | 0               | 40              | 0              | 0              | 0                | 0                | 0         | 0          | 0            | 0             | 0        | 0              | 0       | 0    | 0                        | 0         | 0     | 0                    | 0        |
| L82        | 0               | 0               | 0              | 0              | 0                | 6                | 0         | 0          | 0            | 0             | 0        | 0              | 0       | 34   | 0                        | 0         | 0     | 0                    | 0        |
| L82        | 0               | 40              | 0              | 0              | 0                | 0                | 0         | 0          | 0            | 0             | 0        | 0              | 0       | 0    | 0                        | 0         | 0     | 0                    | 0        |
| L82        | 0               | 0               | 0              | 0              | 0                | 0                | 40        | 0          | 0            | 0             | 0        | 0              | 0       | 0    | 0                        | 0         | 0     | 0                    | 0        |
| L82        | 0               | 0               | 0              | 0              | 0                | 0                | 40        | 0          | 0            | 0             | 0        | 0              | 0       | 0    | 0                        | 0         | 0     | 0                    | 0        |
| L82        | 0               | 9               | 0              | 0              | 0                | 0                | 0         | 0          | 0            | 0             | 0        | 0              | 0       | 31   | 0                        | 0         | 0     | 0                    | 0        |
| L65        | 0               | 0               | 0              | 0              | 0                | 0                | 0         | 0          | 9            | 0             | 0        | 0              | 0       | 0    | 0                        | 0         | 0     | 0                    | 0        |
| L47        | 0               | 0               | 0              | 3              | 3                | 0                | 0         | 0          | 0            | 35            | 0        | 0              | 0       | 0    | 0                        | 0         | 0     | 0                    | 2        |
| L21        | 40              | 0               | 0              | 0              | 0                | 0                | 0         | 0          | 0            | 0             | 0        | 0              | 0       | 0    | 0                        | 0         | 0     | 0                    | 0        |
| L55        | 0               | 0               | 0              | 0              | 0                | 9                | 0         | 0          | 0            | 0             | 0        | 10             | 0       | 0    | 3                        | 0         | 0     | 0                    | 0        |
| L55        | 0               | 0               | 0              | 0              | 0                | 17               | 10        | 0          | 0            | 0             | 0        | 0              | 0       | 0    | 13                       | 0         | 0     | 0                    | 0        |
| L76        | 0               | 0               | 0              | 0              | 0                | 17               | 0         | 0          | 0            | 9             | 0        | 0              | 3       | 0    | 0                        | 0         | 0     | 0                    | 0        |
| L73        | 0               | 0               | 0              | 0              | 0                | 13               | 15        | 0          | 0            | 0             |          |                |         |      |                          |           |       |                      |          |

| Species ID | micro-crustacea | macro-crustacea | micro-bivalvia | macro-bivalvia | micro-gastropoda | macro-gastropoda | Brachyura | Polychaeta | Foraminifera | Echinodermata | Copepoda | gnathid Isopod | Anomura | fish | amorphous organic matter | Black AOM | algae | coral organic matter | sediment |
|------------|-----------------|-----------------|----------------|----------------|------------------|------------------|-----------|------------|--------------|---------------|----------|----------------|---------|------|--------------------------|-----------|-------|----------------------|----------|
| L73        | 0               | 0               | 0              | 0              | 0                | 40               | 0         | 0          | 0            | 0             | 0        | 0              | 0       | 0    | 0                        | 0         | 0     | 0                    | 0        |
| L73        | 0               | 0               | 0              | 0              | 0                | 0                | 0         | 0          | 0            | 0             | 0        | 0              | 0       | 0    | 0                        | 0         | 0     | 0                    | 0        |
| L82        | 0               | 0               | 0              | 0              | 0                | 0                | 40        | 0          | 0            | 0             | 0        | 0              | 0       | 0    | 0                        | 0         | 0     | 0                    | 0        |
| L82        | 0               | 0               | 0              | 0              | 0                | 0                | 40        | 0          | 0            | 0             | 0        | 0              | 0       | 0    | 0                        | 0         | 0     | 0                    | 0        |
| L55        | 0               | 0               | 0              | 0              | 0                | 0                | 0         | 0          | 0            | 0             | 0        | 0              | 0       | 0    | 0                        | 0         | 0     | 0                    | 0        |
| L57        | 0               | 20              | 0              | 0              | 0                | 0                | 0         | 0          | 0            | 9             | 0        | 0              | 0       | 0    | 4                        | 0         | 0     | 0                    | 0        |
| L65        | 0               | 0               | 0              | 0              | 0                | 34               | 0         | 0          | 0            | 6             | 0        | 0              | 0       | 0    | 0                        | 0         | 0     | 0                    | 0        |
| L47        | 0               | 0               | 0              | 6              | 6                | 0                | 0         | 0          | 0            | 0             | 0        | 0              | 0       | 0    | 0                        | 0         | 0     | 0                    | 14       |
| L47        | 0               | 24              | 0              | 11             | 11               | 0                | 0         | 0          | 0            | 2             | 0        | 0              | 0       | 0    | 0                        | 0         | 0     | 0                    | 3        |
| L65        | 0               | 0               | 0              | 0              | 0                | 0                | 12        | 0          | 0            | 28            | 0        | 0              | 0       | 0    | 0                        | 0         | 0     | 0                    | 0        |
| L65        | 0               | 0               | 0              | 0              | 0                | 0                | 29        | 0          | 0            | 11            | 0        | 0              | 0       | 0    | 0                        | 0         | 0     | 0                    | 0        |
| L65        | 0               | 0               | 0              | 13             | 13               | 0                | 0         | 0          | 0            | 0             | 0        | 0              | 0       | 0    | 6                        | 0         | 0     | 0                    | 0        |
| L65        | 0               | 0               | 0              | 19             | 19               | 0                | 12        | 0          | 0            | 0             | 0        | 0              | 0       | 0    | 6                        | 0         | 0     | 0                    | 3        |
| L65        | 0               | 0               | 0              | 23             | 23               | 0                | 0         | 7          | 0            | 8             | 0        | 0              | 0       | 0    | 2                        | 0         | 0     | 0                    | 0        |
| L65        | 0               | 11              | 0              | 0              | 0                | 0                | 0         | 0          | 0            | 29            | 0        | 0              | 0       | 0    | 0                        | 0         | 0     | 0                    | 0        |
| L65        | 0               | 0               | 0              | 0              | 0                | 0                | 0         | 16         | 0            | 24            | 0        | 0              | 0       | 0    | 0                        | 0         | 0     | 0                    | 0        |
| L65        | 0               | 0               | 0              | 0              | 0                | 0                | 0         | 0          | 0            | 40            | 0        | 0              | 0       | 0    | 0                        | 0         | 0     | 0                    | 0        |
| L65        | 0               | 0               | 0              | 7              | 7                | 0                | 0         | 0          | 0            | 2             | 0        | 0              | 0       | 0    | 29                       | 0         | 0     | 0                    | 2        |
| L13        | 0               | 22              | 0              | 1              | 1                | 0                | 12        | 0          | 0            | 5             | 0        | 0              | 0       | 0    | 0                        | 0         | 0     | 0                    | 0        |
| L65        | 0               | 0               | 0              | 0              | 0                | 0                | 24        | 0          | 0            | 0             | 0        | 0              | 0       | 0    | 16                       | 0         | 0     | 0                    | 0        |
| L65        | 0               | 0               | 0              | 8              | 8                | 0                | 0         | 0          | 0            | 24            | 0        | 0              | 0       | 0    | 5                        | 0         | 0     | 0                    | 3        |
| L65        | 0               | 0               | 0              | 0              | 0                | 0                | 0         | 0          | 0            | 3             | 0        | 0              | 0       | 0    | 37                       | 0         | 0     | 0                    | 0        |
| L65        | 0               | 13              | 0              | 4              | 4                | 0                | 0         | 0          | 0            | 0             | 0        | 0              | 0       | 0    | 6                        | 0         | 0     | 0                    | 16       |
| L21        | 0               | 0               | 0              | 0              | 0                | 0                | 11        | 0          | 0            | 0             | 0        | 0              | 0       | 0    | 0                        | 0         | 0     | 0                    | 29       |
| L73        | 0               | 0               | 0              | 16             | 16               | 0                | 0         | 0          | 0            | 0             | 0        | 0              | 0       | 0    | 7                        | 0         | 0     | 0                    | 5        |
| L21        | 28              | 0               | 0              | 0              | 0                | 0                | 0         | 0          | 0            | 0             | 0        | 0              | 0       | 0    | 0                        | 0         | 0     | 0                    | 12       |
| L73        | 0               | 0               | 0              | 0              | 0                | 10               | 0         | 0          | 0            | 0             | 0        | 12             | 0       | 12   | 0                        | 0         | 0     | 0                    | 6        |
| L21        | 25              | 0               | 0              | 0              | 0                | 0                | 0         | 0          | 0            | 0             | 0        | 0              | 0       | 0    | 0                        | 0         | 0     | 0                    | 15       |
| L73        | 0               | 0               | 0              | 3              | 3                | 0                | 0         | 0          | 1            | 34            | 0        | 0              | 0       | 0    | 0                        | 0         | 0     | 0                    | 2        |
| L73        | 0               | 0               | 0              | 13             | 13               | 12               | 0         | 0          | 0            | 0             | 0        | 5              | 0       | 10   | 0                        | 0         | 0     | 0                    | 0        |
| L73        | 0               | 0               | 0              | 0              | 0                | 16               | 0         | 0          | 0            | 0             | 0        | 7              | 0       | 17   | 0                        | 0         | 0     | 0                    | 0        |
| L73        | 0               | 0               | 0              | 7              | 7                | 0                | 0         | 0          | 0            | 9             | 0        | 17             | 0       | 7    | 0                        | 0         | 0     | 0                    | 0        |
| L73        | 0               | 0               | 0              | 17             | 17               | 0                | 0         | 5          | 0            | 0             | 0        | 0              | 0       | 11   | 0                        | 0         | 0     | 0                    | 0        |
| L82        | 0               | 0               | 0              | 0              | 0                | 0                | 0         | 0          | 0            | 0             | 0        | 0              | 0       | 40   | 0                        | 0         | 0     | 0                    | 0        |
| L82        | 0               | 3               | 0              | 0              | 0                | 0                | 0         | 0          | 0            | 0             | 0        | 0              | 0       | 37   | 0                        | 0         | 0     | 0                    | 0        |
| L21        | 11              | 0               | 0              | 0              | 0                | 0                | 0         | 0          | 0            | 9             | 0        | 0              | 0       | 0    | 0                        | 0         | 0     | 0                    | 20       |
| L82        | 0               | 0               | 0              | 0              | 0                | 0                | 0         | 0          | 0            | 0             | 0        | 0              | 0       | 40   | 0                        | 0         | 0     | 0                    | 0        |
| L21        | 6               | 0               | 0              | 0              | 0                | 0                | 0         | 0          | 0            | 0             | 0        | 0              | 0       | 0    | 0                        | 0         | 0     | 0                    | 34       |
| L82        | 0               | 0               | 0              | 0              | 0                | 0                | 0         | 0          | 0            | 0             | 0        | 0              | 0       | 40   | 0                        | 0         | 0     | 0                    | 0        |
| L77        | 0               | 0               | 0              | 3              | 3                | 0                | 0         | 0          | 0            | 11            | 0        | 0              | 0       | 0    | 3                        | 0         | 0     | 0                    | 11       |
| L47        | 0               | 0               | 0              | 34             | 34               | 0                | 0         | 0          | 0            | 0             | 0        | 0              | 0       | 0    | 0                        | 0         | 0     | 0                    | 6        |
| L21        | 40              | 0               | 0              | 0              | 0                | 0                | 0         | 0          | 0            | 0             | 0        | 0              | 0       | 0    | 0                        | 0         | 0     | 0                    | 0        |
| L47        | 0               | 18              | 0              | 16             | 16               | 0                | 0         | 0          | 0            | 0             | 0        | 0              | 0       | 0    | 0                        | 0         | 0     | 0                    | 6        |
| L35        | 0               | 0               | 0              | 3              | 3                | 0                | 0         | 19         | 0            | 0             | 0        | 0              | 0       | 0    | 18                       | 0         | 0     | 0                    | 0        |
| L35        | 0               | 0               | 0              | 0              | 0                | 0                | 0         | 35         | 0            | 0             | 0        | 0              | 0       | 0    | 2                        | 0         | 0     | 0                    | 3        |
| L78        | 0               | 0               | 0              | 0              | 0                | 0                | 0         | 0          | 0            | 31            | 0        | 0              | 0       | 0    | 9                        | 0         | 0     | 0                    | 0        |
| L36        | 0               | 0               | 0              | 19             | 19               | 0                | 0         | 0          | 0            | 0             | 0        | 0              | 0       | 0    | 21                       | 0         | 0     | 0                    | 0        |
| L76        | 0               | 0               | 0              | 0              | 0                | 10               | 0         | 0          | 0            | 0             | 0        | 1              | 0       | 6    | 0                        | 0         | 0     | 0                    | 3        |
| L36        | 0               | 0               | 0              | 40             | 40               | 0                | 0         | 0          | 0            | 0             | 0        | 0              | 0       | 0    | 0                        | 0         | 0     | 0                    | 0        |
| L76        | 0               | 0               | 0              | 0              | 0                | 23               | 0         | 0          | 0            | 0             | 0        | 2              | 0       | 5    | 0                        | 0         | 0     | 0                    | 4        |
| L57        | 0               | 0               | 0              | 2              | 2                | 0                | 38        | 0          | 0            | 0             | 0        | 0              | 0       | 0    | 0                        | 0         | 0     | 0                    | 0        |
| L57        | 0               | 0               | 0              | 4              | 4                | 0                | 0         | 0          | 0            | 30            | 0        | 0              | 0       | 0    | 6                        | 0         | 0     | 0                    | 0        |
| L41        | 22              | 0               | 0              | 3              | 3                | 0                | 0         | 0          | 0            | 15            | 0        | 0              | 0       | 0    | 0                        | 0         | 0     | 0                    | 0        |
| L57        | 0               | 0               | 0              | 0              | 0                | 0                | 0         | 0          | 0            | 37            | 0        | 0              | 0       | 0    | 3                        | 0         | 0     | 0                    | 0        |
| L57        | 0               | 0               | 0              | 0              | 0                | 9                | 0         | 0          | 0            | 28            | 0        | 0              | 0       | 0    | 3                        | 0         | 0     | 0                    | 0        |
| L21        | 0               | 0               | 0              | 0              | 0                | 0                | 0         | 0          | 0            | 0             | 0        | 0              | 0       | 0    | 40                       | 0         | 0     | 0                    | 0        |
| L3         | 7               | 0               | 0              | 1              | 1                | 0                | 0         | 1          | 1            | 0             | 0        | 0              | 0       | 0    | 28                       | 0         | 0     | 0                    | 2        |
| L3         | 0               | 3               | 0              | 2              | 2                | 0                | 0         | 0          | 0            | 0             | 0        | 0              | 0       | 0    | 35                       | 0         | 0     | 0                    | 0        |
| L55        | 0               | 0               | 0              | 5              | 5                | 27               | 8         | 0          | 0            | 0             | 0        | 0              | 0       | 0    | 0                        | 0         | 0     | 0                    | 0        |
| L16        | 0               | 0               | 0              | 0              | 0                | 0                | 0         | 0          | 0            | 0             | 0        | 0              | 0       | 0    | 0                        | 0         | 0     | 0                    | 0        |
| L55        | 0               | 18              | 1              | 0              | 0                | 7                | 2         | 4          | 0            | 0             | 0        | 0              | 0       | 0    | 8                        | 0         | 0     | 0                    | 0        |
| L55        | 0               | 7               | 0              | 0              | 0                | 1                | 16        | 1          | 0            | 0             | 0        | 0              | 0       | 0    | 6                        | 0         | 0     | 0                    | 0        |
| L94        | 0               | 0               | 0              | 0              | 0                | 40               | 0         | 0          | 0            | 0             | 0        | 0              | 0       | 0    | 0                        | 0         | 0     | 0                    | 0        |
| L18        | 0               | 16              | 0              | 10             | 10               | 0                | 0         | 0          | 2            | 0             | 0        | 0              | 0       | 0    | 0                        | 0         | 0     | 0                    | 12       |
| L55        | 0               | 20              | 0              | 1              | 1                | 13               | 0         | 5          | 0            | 0             | 0        | 0              | 0       | 0    | 0                        | 0         | 1     | 0                    | 0        |
| L18        | 34              | 0               | 0              | 0              | 0                | 0                | 6         | 0          | 0            | 0             | 0        | 0              | 0       | 0    | 0                        | 0         | 0     | 0                    | 0        |
| L55        | 0               | 32              | 0              | 1              | 1                | 0                | 0         | 0          | 0            | 0             | 0        | 0              | 0       | 0    | 7                        | 0         | 0     | 0                    | 0        |
| L55        | 0               | 24              | 1              | 9              | 9                | 0                | 0         | 0          | 0            | 0             | 0        | 0              | 0       | 0    | 6                        | 0         | 0     | 0                    | 0        |
| L55        | 0               | 24              | 6              | 6              | 6                | 0                | 0         | 0          | 1            | 0             | 0        | 0              | 0       | 0    | 3                        | 0         | 0     | 0                    | 0        |
| L24        | 15              | 0               | 0              | 0              | 0                | 0                | 0         | 1          | 0            | 0             | 0        | 0              | 0       | 0    | 6                        | 0         | 0     | 0                    | 13       |
| L36        | 0               | 0               | 0              | 26             | 26               | 0                | 0         | 0          | 1            | 0             | 2        | 0              | 0       | 0    | 7                        | 0         | 0     | 0                    | 0        |
| L36        | 0               | 13              | 0              | 17             | 17               | 0                | 0         | 0          | 0            | 0             | 0        | 0              | 0       | 0    | 6                        | 0         | 0     | 0                    | 2        |
| L36        | 0               | 21              | 0              | 6              | 6                | 0                | 0         | 0          | 0            | 0             | 0        | 0              | 0       | 0    | 8                        | 0         | 0     | 0                    | 2        |
| L36        | 0               | 0               | 0              | 23             | 23               | 0                | 0         | 0          | 0            | 0             | 0        | 0              | 0       | 0    | 17                       | 0         | 0     | 0                    | 0        |
| L12        | 0               | 0               | 0              | 0              | 0                | 0                | 0         | 0          | 0            | 0             | 0        | 0              | 0       | 0    | 40                       | 0         | 0     | 0                    | 0        |
| L36        | 0               | 0               | 0              | 3              | 3                | 0                | 0         | 0          | 0            | 0             | 0        | 0              | 0       | 0    | 32                       | 0         | 0     | 0                    | 2        |
| L12        | 0               | 0               | 0              | 0              | 0                | 0                | 0         | 0          | 0            | 0             | 0        | 0              | 0       | 0    | 40                       | 0         | 0     | 0                    | 0        |
| L41        | 16              | 0               | 0              | 3              | 3                | 0                | 0         | 4          | 0            | 0             | 0        | 0              | 0       | 0    | 17                       | 0         | 0     | 0                    | 0        |
| L12        | 0               | 0               | 0              | 0              | 0                | 0                | 0         | 0          | 0            | 0             | 0        | 0              | 0       | 0    | 40                       | 0         | 0     | 0                    | 0        |
| L41        | 26              | 0               | 0              | 0              | 0                | 0                | 0         | 7          | 0            | 0             | 0        | 0              | 0       | 0    | 6                        | 0         | 0     | 0                    | 1        |
| L10        | 12              | 0               | 0              | 2              | 2                | 0                | 0         | 0          | 0            | 0             | 0        | 0              | 0       | 0    | 26                       | 0         | 0     | 0                    | 0        |
| L41        | 35              | 0               | 0              | 0              | 0                | 0                | 0         | 3          | 0            | 0             | 0        | 0              | 0       | 0    | 2                        | 0         | 0     | 0                    | 0        |
| L10        | 0               | 0               | 0              | 0              | 0                | 0                | 0         | 0          | 0            | 0             | 0        | 0              | 0       | 0    | 0                        | 0         | 0     | 0                    | 0        |
| L50        | 0               | 0               | 0              | 0              | 0                | 0                | 3         | 7          | 0            | 9             | 0        | 0              | 0       | 0    | 14                       | 0         | 0     | 0                    | 4        |
| L10        | 22              | 0               | 0              | 3              | 3                | 0                | 0         | 0          | 0            | 2             | 0        | 0              | 0       | 0    | 0                        | 0         | 0     | 0                    | 13       |
| L31        | 0               | 8               | 0              | 23             | 23               | 3                | 0         | 0          | 0            | 0             | 0        | 0              | 0       | 0    | 2                        | 0         | 0     | 0                    | 4        |
| L31        | 8               | 0               | 0              | 32             | 32               | 0                | 0         | 0          | 0            | 0             | 0        | 0              | 0       | 0    | 0                        | 0         | 0     | 0                    | 0        |
| L45        | 0               | 9               | 2              | 24             | 24               | 0                | 0         | 0          | 0            | 0             | 0        | 0              | 0       | 0    | 4                        | 0         | 0     | 0                    | 1        |
| L45        | 0               | 19              | 0              | 10             | 10               | 0                | 0         | 0          | 0            | 6             | 0        | 0              | 0       | 0    | 3                        | 0         | 0     | 0                    | 2        |
| L86        | 0               | 0               | 0              | 0              | 0                | 0                | 0         | 0          | 0            | 0             | 0        | 0              | 0       | 0    | 0                        | 0         | 40    | 0                    | 0        |
| L43        | 0               | 0               | 0              | 0              | 0                | 0                | 0         | 0          | 0            | 0             | 0        | 0              | 0       | 0    | 40                       | 0         | 0     | 0                    | 0        |
| L86        | 0               | 0               | 0              | 0              | 0                | 0                | 0         | 0          | 0            | 0             | 0        | 0              | 0       | 0    | 0                        | 0         | 40    | 0                    | 0        |
| L43        | 0               | 0               | 0              | 0              | 0                | 0                | 0         | 0          | 0            | 0             | 0        | 0              | 0       | 0    | 40                       | 0         | 0     | 0                    | 0        |
| L54        | 0               | 38              | 0              | 0              | 0                | 0                | 0         | 0          | 0            | 0             | 0        | 0              | 0       | 0    | 0                        | 0         | 0     | 0                    | 2        |
| L43        | 19              | 0               | 0              | 0              | 0                | 0                | 0         | 0          | 0            | 3             | 0        | 0              | 0       | 0    | 15                       | 0         | 0     | 0                    | 3        |
| L19        | 19              | 7               | 0              |                |                  |                  |           |            |              |               |          |                |         |      |                          |           |       |                      |          |

| Species ID | micro-crustacea | macro-crustacea | micro-bivalvia | macro-bivalvia | micro-gastropoda | macro-gastropoda | Brachyura | Polychaeta | Foraminifera | Echinodermata | Copepoda | gnathid Isopod | Anomura | fish | amorphous organic matter | Black AOM | algae | coral organic matter | sediment |
|------------|-----------------|-----------------|----------------|----------------|------------------|------------------|-----------|------------|--------------|---------------|----------|----------------|---------|------|--------------------------|-----------|-------|----------------------|----------|
| L16        | 23              | 0               | 1              | 0              | 0                | 0                | 0         | 0          | 0            | 0             | 9        | 0              | 0       | 0    | 6                        | 0         | 0     | 0                    | 0        |
| L16        | 2               | 0               | 0              | 0              | 0                | 0                | 0         | 0          | 0            | 0             | 35       | 0              | 0       | 0    | 3                        | 0         | 0     | 0                    | 0        |
| L16        | 13              | 0               | 0              | 1              | 1                | 0                | 0         | 0          | 0            | 0             | 7        | 0              | 0       | 0    | 19                       | 0         | 0     | 0                    | 0        |
| L16        | 20              | 0               | 0              | 0              | 0                | 0                | 0         | 0          | 0            | 0             | 9        | 0              | 0       | 0    | 11                       | 0         | 0     | 0                    | 0        |
| L16        | 14              | 0               | 0              | 1              | 1                | 0                | 0         | 0          | 0            | 0             | 13       | 0              | 0       | 0    | 12                       | 0         | 0     | 0                    | 0        |
| L16        | 1               | 0               | 0              | 0              | 0                | 0                | 0         | 0          | 0            | 0             | 37       | 0              | 0       | 0    | 2                        | 0         | 0     | 0                    | 0        |
| L27        | 40              | 0               | 0              | 0              | 0                | 0                | 0         | 0          | 0            | 0             | 0        | 0              | 0       | 0    | 0                        | 0         | 0     | 0                    | 0        |
| L16        | 3               | 0               | 0              | 0              | 0                | 0                | 0         | 0          | 0            | 0             | 26       | 0              | 0       | 0    | 10                       | 0         | 0     | 0                    | 0        |
| L42        | 15              | 0               | 0              | 23             | 23               | 0                | 2         | 0          | 0            | 0             | 0        | 0              | 0       | 0    | 0                        | 0         | 0     | 0                    | 0        |
| L16        | 24              | 0               | 0              | 0              | 0                | 0                | 0         | 0          | 0            | 0             | 13       | 0              | 0       | 0    | 3                        | 0         | 0     | 0                    | 0        |
| L11        | 28              | 2               | 0              | 0              | 0                | 0                | 0         | 0          | 0            | 0             | 10       | 0              | 0       | 0    | 0                        | 0         | 0     | 0                    | 0        |
| L16        | 19              | 0               | 0              | 0              | 0                | 0                | 0         | 5          | 0            | 0             | 7        | 0              | 0       | 0    | 9                        | 0         | 0     | 0                    | 0        |
| L5         | 27              | 0               | 0              | 0              | 0                | 0                | 0         | 0          | 0            | 0             | 0        | 0              | 0       | 0    | 13                       | 0         | 0     | 0                    | 0        |
| L36        | 33              | 0               | 0              | 7              | 7                | 0                | 0         | 0          | 0            | 0             | 0        | 0              | 0       | 0    | 0                        | 0         | 0     | 0                    | 0        |
| L5         | 21              | 0               | 0              | 0              | 0                | 0                | 0         | 0          | 0            | 0             | 0        | 0              | 0       | 0    | 19                       | 0         | 0     | 0                    | 0        |
| L76        | 0               | 0               | 0              | 0              | 0                | 0                | 11        | 0          | 0            | 0             | 0        | 0              | 0       | 29   | 0                        | 0         | 0     | 0                    | 0        |
| L5         | 22              | 0               | 0              | 0              | 0                | 0                | 0         | 0          | 0            | 0             | 0        | 0              | 0       | 0    | 18                       | 0         | 0     | 0                    | 0        |
| L5         | 31              | 0               | 0              | 0              | 0                | 0                | 0         | 0          | 0            | 0             | 0        | 0              | 0       | 0    | 9                        | 0         | 0     | 0                    | 0        |
| L5         | 15              | 0               | 0              | 0              | 0                | 0                | 0         | 0          | 0            | 0             | 3        | 0              | 0       | 0    | 22                       | 0         | 0     | 0                    | 0        |
| L46        | 0               | 0               | 0              | 0              | 0                | 0                | 0         | 0          | 0            | 0             | 0        | 0              | 0       | 40   | 0                        | 0         | 0     | 0                    | 0        |
| L5         | 17              | 0               | 0              | 4              | 4                | 0                | 0         | 0          | 0            | 0             | 0        | 0              | 0       | 0    | 19                       | 0         | 0     | 0                    | 0        |
| L46        | 0               | 0               | 0              | 0              | 0                | 0                | 0         | 0          | 0            | 0             | 0        | 0              | 0       | 40   | 0                        | 0         | 0     | 0                    | 0        |
| L5         | 24              | 0               | 0              | 0              | 0                | 0                | 0         | 0          | 0            | 0             | 0        | 0              | 0       | 0    | 16                       | 0         | 0     | 0                    | 0        |
| L46        | 0               | 0               | 0              | 0              | 0                | 0                | 0         | 0          | 0            | 0             | 0        | 0              | 0       | 40   | 0                        | 0         | 0     | 0                    | 0        |
| L5         | 37              | 0               | 0              | 0              | 0                | 0                | 0         | 0          | 0            | 0             | 0        | 0              | 0       | 0    | 3                        | 0         | 0     | 0                    | 0        |
| L64        | 9               | 0               | 0              | 0              | 0                | 0                | 0         | 0          | 0            | 0             | 0        | 0              | 0       | 0    | 31                       | 0         | 0     | 0                    | 0        |
| L5         | 23              | 0               | 0              | 0              | 0                | 0                | 0         | 0          | 0            | 0             | 0        | 0              | 0       | 0    | 17                       | 0         | 0     | 0                    | 0        |
| L92        | 0               | 0               | 0              | 13             | 13               | 0                | 0         | 0          | 0            | 0             | 0        | 0              | 0       | 0    | 27                       | 0         | 0     | 0                    | 0        |
| L76        | 0               | 0               | 0              | 0              | 0                | 4                | 0         | 0          | 0            | 2             | 0        | 0              | 3       | 0    | 0                        | 0         | 0     | 0                    | 1        |
| L78        | 0               | 0               | 0              | 0              | 0                | 7                | 0         | 0          | 0            | 0             | 0        | 0              | 4       | 0    | 1                        | 0         | 0     | 0                    | 3        |
| L11        | 2               | 2               | 36             | 0              | 0                | 0                | 0         | 0          | 0            | 0             | 0        | 0              | 0       | 0    | 0                        | 0         | 0     | 0                    | 0        |
| L24        | 28              | 0               | 0              | 1              | 1                | 0                | 0         | 0          | 11           | 0             | 0        | 0              | 0       | 0    | 0                        | 0         | 0     | 0                    | 0        |
| L59        | 7               | 0               | 0              | 0              | 0                | 28               | 0         | 0          | 0            | 0             | 0        | 2              | 0       | 0    | 0                        | 0         | 0     | 0                    | 3        |
| L52        | 0               | 0               | 4              | 24             | 24               | 0                | 0         | 0          | 0            | 1             | 0        | 0              | 0       | 0    | 11                       | 0         | 0     | 0                    | 0        |
| L52        | 0               | 0               | 3              | 15             | 15               | 0                | 0         | 0          | 10           | 0             | 0        | 0              | 0       | 0    | 12                       | 0         | 0     | 0                    | 0        |
| L80        | 0               | 0               | 0              | 0              | 0                | 12               | 25        | 0          | 0            | 0             | 0        | 0              | 0       | 0    | 0                        | 0         | 0     | 0                    | 0        |
| L52        | 0               | 0               | 2              | 0              | 0                | 29               | 0         | 0          | 0            | 0             | 0        | 0              | 0       | 0    | 9                        | 0         | 0     | 0                    | 0        |
| L72        | 0               | 0               | 0              | 40             | 40               | 0                | 0         | 0          | 0            | 0             | 0        | 0              | 0       | 0    | 0                        | 0         | 0     | 0                    | 0        |
| L52        | 4               | 0               | 0              | 24             | 24               | 0                | 0         | 0          | 1            | 0             | 0        | 0              | 0       | 0    | 11                       | 0         | 0     | 0                    | 0        |
| L52        | 2               | 0               | 0              | 22             | 22               | 0                | 0         | 0          | 0            | 2             | 0        | 0              | 0       | 0    | 14                       | 0         | 0     | 0                    | 0        |
| L52        | 3               | 0               | 5              | 14             | 14               | 0                | 0         | 0          | 0            | 10            | 0        | 0              | 0       | 0    | 8                        | 0         | 0     | 0                    | 0        |
| L78        | 0               | 0               | 0              | 0              | 0                | 40               | 0         | 0          | 0            | 0             | 0        | 0              | 0       | 0    | 0                        | 0         | 0     | 0                    | 0        |
| L52        | 0               | 0               | 0              | 17             | 17               | 0                | 9         | 1          | 0            | 0             | 0        | 0              | 0       | 0    | 13                       | 0         | 0     | 0                    | 0        |
| L78        | 0               | 0               | 0              | 0              | 0                | 32               | 0         | 0          | 0            | 0             | 0        | 0              | 0       | 0    | 0                        | 0         | 0     | 0                    | 0        |
| L52        | 3               | 0               | 4              | 14             | 14               | 1                | 0         | 0          | 1            | 6             | 0        | 0              | 0       | 0    | 11                       | 0         | 0     | 0                    | 0        |
| L52        | 0               | 10              | 5              | 19             | 19               | 0                | 0         | 0          | 0            | 0             | 0        | 0              | 0       | 0    | 6                        | 0         | 0     | 0                    | 0        |
| L52        | 6               | 1               | 0              | 7              | 7                | 0                | 0         | 0          | 0            | 3             | 0        | 0              | 0       | 0    | 22                       | 0         | 0     | 0                    | 1        |
| L52        | 0               | 0               | 0              | 11             | 11               | 0                | 0         | 0          | 0            | 0             | 0        | 0              | 0       | 0    | 22                       | 0         | 0     | 0                    | 7        |
| L52        | 0               | 0               | 0              | 24             | 24               | 0                | 0         | 0          | 0            | 0             | 0        | 0              | 0       | 0    | 16                       | 0         | 0     | 0                    | 0        |
| L52        | 0               | 0               | 3              | 7              | 7                | 0                | 0         | 2          | 0            | 0             | 0        | 0              | 0       | 0    | 28                       | 0         | 0     | 0                    | 0        |
| L52        | 3               | 0               | 7              | 19             | 19               | 4                | 0         | 0          | 0            | 0             | 0        | 0              | 0       | 0    | 7                        | 0         | 0     | 0                    | 0        |
| L52        | 5               | 1               | 0              | 21             | 21               | 0                | 0         | 7          | 0            | 0             | 0        | 0              | 0       | 0    | 6                        | 0         | 0     | 0                    | 0        |
| L52        | 10              | 0               | 3              | 20             | 20               | 0                | 0         | 0          | 2            | 0             | 0        | 0              | 0       | 0    | 0                        | 0         | 0     | 0                    | 3        |
| L72        | 0               | 0               | 14             | 26             | 26               | 0                | 0         | 0          | 0            | 0             | 0        | 0              | 0       | 0    | 0                        | 0         | 0     | 0                    | 0        |
| L52        | 2               | 0               | 0              | 28             | 28               | 0                | 0         | 2          | 1            | 0             | 0        | 0              | 0       | 0    | 2                        | 0         | 0     | 0                    | 5        |
| L45        | 0               | 0               | 7              | 23             | 23               | 0                | 0         | 0          | 0            | 0             | 0        | 0              | 0       | 0    | 10                       | 0         | 0     | 0                    | 0        |
| L22        | 0               | 0               | 1              | 0              | 0                | 0                | 0         | 0          | 12           | 0             | 0        | 0              | 0       | 0    | 27                       | 0         | 0     | 0                    | 0        |
| L32        | 0               | 0               | 0              | 4              | 4                | 0                | 0         | 3          | 27           | 0             | 0        | 0              | 0       | 0    | 3                        | 0         | 0     | 0                    | 3        |
| L32        | 0               | 0               | 0              | 0              | 0                | 0                | 0         | 0          | 40           | 0             | 0        | 0              | 0       | 0    | 0                        | 0         | 0     | 0                    | 0        |
| L53        | 2               | 0               | 0              | 0              | 0                | 0                | 0         | 0          | 0            | 0             | 0        | 0              | 0       | 0    | 38                       | 0         | 0     | 0                    | 0        |
| L32        | 4               | 0               | 0              | 1              | 1                | 0                | 0         | 2          | 16           | 0             | 0        | 0              | 0       | 0    | 17                       | 0         | 0     | 0                    | 0        |
| L53        | 0               | 0               | 0              | 0              | 0                | 0                | 0         | 0          | 0            | 0             | 0        | 0              | 0       | 0    | 40                       | 0         | 0     | 0                    | 0        |
| L32        | 0               | 0               | 3              | 25             | 25               | 0                | 0         | 1          | 0            | 0             | 0        | 0              | 0       | 0    | 7                        | 0         | 0     | 0                    | 4        |
| L53        | 0               | 0               | 0              | 0              | 0                | 0                | 0         | 0          | 0            | 1             | 0        | 0              | 0       | 0    | 39                       | 0         | 0     | 0                    | 0        |
| L32        | 0               | 0               | 0              | 7              | 7                | 2                | 0         | 0          | 25           | 0             | 0        | 0              | 0       | 0    | 6                        | 0         | 0     | 0                    | 0        |
| L53        | 0               | 0               | 0              | 0              | 0                | 0                | 0         | 0          | 0            | 0             | 0        | 0              | 0       | 0    | 40                       | 0         | 0     | 0                    | 0        |
| L32        | 0               | 0               | 0              | 6              | 6                | 0                | 0         | 2          | 7            | 0             | 0        | 0              | 0       | 0    | 17                       | 0         | 0     | 0                    | 8        |
| L4         | 40              | 0               | 0              | 0              | 0                | 0                | 0         | 0          | 0            | 0             | 0        | 0              | 0       | 0    | 0                        | 0         | 0     | 0                    | 0        |
| L32        | 1               | 0               | 5              | 10             | 10               | 0                | 0         | 0          | 2            | 0             | 0        | 0              | 0       | 0    | 19                       | 0         | 0     | 0                    | 3        |
| L4         | 39              | 0               | 0              | 1              | 1                | 0                | 0         | 0          | 0            | 0             | 0        | 0              | 0       | 0    | 0                        | 0         | 0     | 0                    | 0        |
| L32        | 0               | 0               | 0              | 1              | 1                | 0                | 0         | 0          | 33           | 0             | 0        | 0              | 0       | 0    | 6                        | 0         | 0     | 0                    | 0        |
| L4         | 0               | 0               | 0              | 0              | 0                | 0                | 40        | 0          | 0            | 0             | 0        | 0              | 0       | 0    | 0                        | 0         | 0     | 0                    | 0        |
| L32        | 0               | 0               | 1              | 3              | 3                | 0                | 0         | 5          | 0            | 0             | 0        | 0              | 0       | 0    | 25                       | 0         | 0     | 0                    | 6        |
| L4         | 0               | 0               | 0              | 0              | 0                | 0                | 40        | 0          | 0            | 0             | 0        | 0              | 0       | 0    | 0                        | 0         | 0     | 0                    | 0        |
| L32        | 0               | 0               | 6              | 1              | 1                | 0                | 0         | 0          | 6            | 0             | 0        | 0              | 0       | 0    | 26                       | 0         | 0     | 0                    | 1        |
| L20        | 26              | 0               | 0              | 1              | 1                | 0                | 0         | 0          | 0            | 0             | 13       | 0              | 0       | 0    | 0                        | 0         | 0     | 0                    | 0        |
| L32        | 3               | 0               | 4              | 6              | 6                | 0                | 0         | 0          | 3            | 0             | 0        | 0              | 0       | 0    | 23                       | 0         | 0     | 0                    | 1        |
| L32        | 0               | 0               | 0              | 8              | 8                | 0                | 30        | 0          | 2            | 0             | 0        | 0              | 0       | 0    | 0                        | 0         | 0     | 0                    | 0        |
| L32        | 0               | 5               | 0              | 7              | 7                | 0                | 0         | 0          | 3            | 0             | 0        | 0              | 0       | 0    | 25                       | 0         | 0     | 0                    | 0        |
| L52        | 0               | 0               | 0              | 7              | 7                | 0                | 0         | 3          | 4            | 0             | 0        | 0              | 0       | 0    | 26                       | 0         | 0     | 0                    | 0        |
| L52        | 0               | 16              | 0              | 0              | 0                | 0                | 0         | 24         | 0            | 0             | 0        | 0              | 0       | 0    | 0                        | 0         | 0     | 0                    | 0        |
| L52        | 0               | 0               | 5              | 1              | 1                | 0                | 0         | 0          | 6            | 0             | 0        | 0              | 0       | 0    | 28                       | 0         | 0     | 0                    | 0        |
| L52        | 0               | 0               | 0              | 7              | 7                | 0                | 21        | 0          | 5            | 0             | 0        | 0              | 0       | 0    | 6                        | 0         | 0     | 0                    | 1        |
| L52        | 0               | 0               | 0              | 0              | 0                | 0                | 0         | 0          | 0            | 0             | 0        | 0              | 0       | 0    | 17                       | 0         | 0     | 0                    | 23       |
| L75        | 0               | 0               | 0              | 0              | 0                | 0                | 40        | 0          | 0            | 0             | 0        | 0              | 0       | 0    | 0                        | 0         | 0     | 0                    | 0        |
| L14        | 25              | 3               | 0              | 1              | 1                | 0                | 0         | 0          | 0            | 1             | 0        | 0              | 0       | 0    | 4                        | 0         | 1     | 0                    | 5        |
| L42        | 0               | 0               | 0              | 0              | 0                | 0                | 6         | 0          | 3            | 0             | 0        | 0              | 0       | 0    | 31                       | 0         | 0     | 0                    | 0        |
| L3         | 0               | 6               | 0              | 0              | 0                | 0                | 0         | 8          | 6            | 0             | 0        | 0              | 0       | 0    | 18                       | 0         | 0     | 0                    | 2        |
| L17        | 0               | 0               | 0              | 0              | 0                | 0                | 0         | 0          | 0            | 1             | 1        | 0              | 0       | 0    | 0                        | 0         | 0     | 0                    | 38       |
| L46        | 0               | 40              | 0              | 0              | 0                | 0                | 0         | 0          | 0            | 0             | 0        | 0              | 0       | 0    | 0                        | 0         | 0     | 0                    | 0        |
| L46        | 0               | 0               | 22             | 0              | 0                | 0                | 0         | 0          | 0            | 0             | 0        | 0              | 0       | 0    | 18                       | 0         | 0     | 0                    | 0        |
| L45        | 0               | 2               | 28             | 2              | 2                | 0                | 0         | 1          | 0            | 0             | 0        | 0              | 0       | 0    | 7                        | 0         | 0     | 0                    | 0        |
| L45        | 0               | 0               | 40             | 0              | 0                | 0                | 0         | 0          | 0            | 0             | 0        | 0              | 0       | 0    | 0                        | 0         | 0     | 0                    | 0        |
| L45        | 0               | 0               | 22             | 0              | 0                | 0                | 15        | 0          | 0            | 0             | 0        | 0              | 0       | 0    | 3                        | 0         | 0     | 0                    | 0        |
| L40        | 0               | 0               | 0              | 0              | 0                | 0                | 0         | 0          | 0            | 0             | 11       | 0              | 0       | 0    | 22                       | 7         | 0     | 0                    | 0        |
| L40        | 0               | 0               | 0              |                |                  |                  |           |            |              |               |          |                |         |      |                          |           |       |                      |          |

| Species ID | micro-crustacea | macro-crustacea | micro-bivalvia | macro-bivalvia | micro-gastropoda | macro-gastropoda | Brachyura | Polychaeta | Foraminifera | Echinodermata | Copepoda | gnathid Isopod | Anomura | fish | amorphous organic matter | Black AOM | algae | coral organic matter | sediment |
|------------|-----------------|-----------------|----------------|----------------|------------------|------------------|-----------|------------|--------------|---------------|----------|----------------|---------|------|--------------------------|-----------|-------|----------------------|----------|
| L26        | 0               | 0               | 0              | 26             | 26               | 0                | 8         | 0          | 1            | 5             | 0        | 0              | 0       | 0    | 0                        | 0         | 0     | 0                    | 0        |
| L26        | 0               | 0               | 0              | 31             | 31               | 0                | 0         | 2          | 0            | 0             | 0        | 0              | 0       | 0    | 7                        | 0         | 0     | 0                    | 0        |
| L26        | 0               | 0               | 28             | 9              | 9                | 0                | 0         | 0          | 0            | 1             | 0        | 0              | 0       | 0    | 2                        | 0         | 0     | 0                    | 0        |
| L26        | 0               | 0               | 0              | 23             | 23               | 0                | 0         | 0          | 0            | 5             | 0        | 0              | 0       | 0    | 12                       | 0         | 0     | 0                    | 0        |
| L8         | 18              | 0               | 0              | 0              | 0                | 0                | 0         | 0          | 0            | 0             | 3        | 0              | 0       | 0    | 19                       | 0         | 0     | 0                    | 0        |
| L8         | 28              | 0               | 0              | 0              | 0                | 0                | 0         | 0          | 0            | 0             | 0        | 0              | 0       | 0    | 12                       | 0         | 0     | 0                    | 0        |
| L8         | 12              | 0               | 0              | 0              | 0                | 0                | 0         | 0          | 0            | 0             | 0        | 0              | 0       | 0    | 27                       | 0         | 1     | 0                    | 0        |
| L30        | 0               | 0               | 0              | 0              | 0                | 0                | 0         | 0          | 0            | 0             | 0        | 0              | 0       | 0    | 34                       | 0         | 0     | 0                    | 0        |
| L30        | 3               | 0               | 0              | 0              | 0                | 0                | 0         | 0          | 0            | 0             | 2        | 0              | 0       | 0    | 35                       | 0         | 0     | 0                    | 0        |
| L30        | 0               | 0               | 0              | 0              | 0                | 0                | 0         | 0          | 0            | 0             | 0        | 0              | 0       | 0    | 39                       | 0         | 0     | 0                    | 0        |
| L44        | 24              | 0               | 0              | 0              | 0                | 0                | 0         | 0          | 0            | 0             | 0        | 0              | 0       | 0    | 16                       | 0         | 0     | 0                    | 0        |
| L44        | 8               | 0               | 0              | 0              | 0                | 0                | 0         | 0          | 0            | 0             | 0        | 0              | 0       | 0    | 31                       | 0         | 0     | 0                    | 1        |
| L34        | 0               | 0               | 0              | 0              | 0                | 0                | 40        | 0          | 0            | 0             | 0        | 0              | 0       | 0    | 0                        | 0         | 0     | 0                    | 0        |
| L48        | 0               | 40              | 0              | 0              | 0                | 0                | 0         | 0          | 0            | 0             | 0        | 0              | 0       | 0    | 0                        | 0         | 0     | 0                    | 0        |
| L42        | 9               | 0               | 0              | 16             | 16               | 0                | 0         | 7          | 0            | 0             | 0        | 0              | 0       | 0    | 6                        | 0         | 0     | 0                    | 2        |
| L42        | 0               | 0               | 26             | 10             | 10               | 0                | 0         | 0          | 0            | 0             | 0        | 0              | 0       | 0    | 4                        | 0         | 0     | 0                    | 0        |
| L15        | 0               | 1               | 0              | 21             | 21               | 0                | 0         | 0          | 0            | 0             | 1        | 0              | 0       | 0    | 14                       | 0         | 0     | 0                    | 3        |
| L15        | 0               | 0               | 3              | 0              | 0                | 0                | 0         | 1          | 0            | 0             | 0        | 0              | 0       | 0    | 30                       | 0         | 0     | 0                    | 6        |
| L7         | 31              | 0               | 0              | 0              | 0                | 0                | 0         | 0          | 1            | 0             | 0        | 0              | 0       | 0    | 6                        | 0         | 0     | 0                    | 2        |
| L69        | 0               | 0               | 0              | 0              | 0                | 0                | 0         | 0          | 29           | 0             | 0        | 0              | 0       | 0    | 11                       | 0         | 0     | 0                    | 0        |
| L69        | 0               | 0               | 0              | 0              | 0                | 0                | 0         | 0          | 34           | 0             | 0        | 0              | 0       | 0    | 6                        | 0         | 0     | 0                    | 0        |
| L69        | 0               | 0               | 0              | 0              | 0                | 0                | 0         | 0          | 40           | 0             | 0        | 0              | 0       | 0    | 0                        | 0         | 0     | 0                    | 0        |
| L36        | 28              | 2               | 4              | 0              | 0                | 0                | 0         | 0          | 0            | 0             | 0        | 0              | 0       | 0    | 4                        | 0         | 0     | 0                    | 2        |
| L36        | 21              | 0               | 0              | 3              | 3                | 0                | 0         | 0          | 1            | 2             | 0        | 0              | 0       | 0    | 8                        | 0         | 0     | 0                    | 3        |
| L19        | 2               | 1               | 0              | 0              | 0                | 0                | 0         | 15         | 0            | 0             | 0        | 0              | 0       | 0    | 20                       | 0         | 0     | 0                    | 2        |
| L19        | 6               | 0               | 0              | 0              | 0                | 0                | 15        | 5          | 0            | 0             | 0        | 0              | 0       | 0    | 10                       | 0         | 0     | 0                    | 4        |
| L19        | 9               | 1               | 0              | 0              | 0                | 0                | 0         | 17         | 0            | 0             | 0        | 0              | 0       | 0    | 10                       | 0         | 0     | 0                    | 3        |
| L35        | 0               | 0               | 0              | 0              | 0                | 0                | 0         | 0          | 0            | 0             | 0        | 0              | 0       | 0    | 0                        | 0         | 23    | 0                    | 17       |
| L35        | 0               | 0               | 0              | 1              | 1                | 0                | 0         | 20         | 0            | 0             | 0        | 0              | 0       | 0    | 11                       | 0         | 0     | 0                    | 7        |
| L86        | 0               | 0               | 0              | 0              | 0                | 0                | 0         | 0          | 0            | 0             | 0        | 0              | 0       | 0    | 7                        | 0         | 0     | 33                   | 0        |
| L54        | 22              | 0               | 0              | 0              | 0                | 0                | 0         | 0          | 0            | 0             | 0        | 0              | 0       | 0    | 18                       | 0         | 0     | 0                    | 0        |
| L90        | 0               | 0               | 0              | 0              | 0                | 0                | 24        | 0          | 0            | 0             | 0        | 0              | 0       | 16   | 0                        | 0         | 0     | 0                    | 0        |
| L90        | 0               | 0               | 0              | 0              | 0                | 0                | 0         | 0          | 0            | 0             | 0        | 0              | 0       | 0    | 0                        | 0         | 0     | 0                    | 0        |
| L35        | 0               | 0               | 0              | 0              | 0                | 0                | 11        | 3          | 0            | 0             | 0        | 0              | 0       | 0    | 0                        | 0         | 13    | 0                    | 9        |
| L80        | 0               | 0               | 0              | 0              | 0                | 24               | 0         | 0          | 0            | 0             | 0        | 12             | 0       | 0    | 4                        | 0         | 0     | 0                    | 0        |
| L37        | 0               | 5               | 0              | 0              | 0                | 29               | 0         | 0          | 0            | 4             | 0        | 0              | 0       | 0    | 0                        | 0         | 0     | 0                    | 2        |
| L54        | 0               | 0               | 0              | 0              | 0                | 40               | 0         | 0          | 0            | 0             | 0        | 0              | 0       | 0    | 0                        | 0         | 0     | 0                    | 0        |
| L36        | 6               | 0               | 27             | 1              | 1                | 0                | 0         | 0          | 0            | 2             | 0        | 0              | 0       | 0    | 0                        | 0         | 0     | 0                    | 3        |
| L36        | 1               | 5               | 22             | 1              | 1                | 0                | 0         | 0          | 0            | 0             | 0        | 0              | 0       | 0    | 0                        | 0         | 0     | 0                    | 5        |
| L87        | 0               | 0               | 0              | 0              | 0                | 0                | 0         | 0          | 0            | 0             | 0        | 0              | 0       | 0    | 6                        | 0         | 0     | 34                   | 0        |
| L44        | 3               | 0               | 0              | 0              | 0                | 0                | 0         | 0          | 0            | 0             | 0        | 0              | 0       | 0    | 37                       | 0         | 0     | 0                    | 0        |
| L44        | 40              | 0               | 0              | 0              | 0                | 0                | 0         | 0          | 0            | 0             | 0        | 0              | 0       | 0    | 0                        | 0         | 0     | 0                    | 0        |
| L44        | 0               | 0               | 0              | 0              | 0                | 0                | 0         | 0          | 0            | 0             | 0        | 0              | 0       | 0    | 40                       | 0         | 0     | 0                    | 0        |
| L36        | 0               | 1               | 0              | 23             | 23               | 0                | 0         | 0          | 2            | 3             | 0        | 0              | 0       | 0    | 9                        | 0         | 0     | 0                    | 2        |
| L36        | 2               | 0               | 0              | 17             | 17               | 0                | 0         | 0          | 1            | 0             | 0        | 0              | 0       | 0    | 6                        | 0         | 0     | 0                    | 3        |
| L36        | 7               | 6               | 0              | 17             | 17               | 0                | 0         | 0          | 0            | 0             | 0        | 0              | 0       | 0    | 7                        | 0         | 0     | 0                    | 2        |
| L36        | 3               | 0               | 4              | 7              | 7                | 0                | 0         | 0          | 0            | 0             | 0        | 0              | 0       | 0    | 20                       | 0         | 0     | 0                    | 6        |
| L8         | 36              | 0               | 0              | 0              | 0                | 0                | 0         | 0          | 0            | 0             | 1        | 0              | 0       | 0    | 3                        | 0         | 0     | 0                    | 0        |
| L8         | 3               | 0               | 0              | 0              | 0                | 0                | 0         | 0          | 0            | 0             | 0        | 0              | 0       | 0    | 37                       | 0         | 0     | 0                    | 0        |
| L5         | 25              | 0               | 0              | 0              | 0                | 0                | 0         | 0          | 2            | 0             | 0        | 0              | 0       | 0    | 9                        | 0         | 1     | 0                    | 3        |
| L5         | 14              | 0               | 0              | 0              | 0                | 0                | 2         | 0          | 0            | 0             | 0        | 0              | 0       | 0    | 18                       | 0         | 0     | 0                    | 6        |
| L5         | 7               | 0               | 0              | 0              | 0                | 0                | 0         | 0          | 0            | 2             | 0        | 0              | 0       | 0    | 28                       | 0         | 0     | 0                    | 1        |
| L5         | 6               | 0               | 0              | 0              | 0                | 0                | 0         | 0          | 1            | 0             | 0        | 0              | 0       | 0    | 33                       | 0         | 0     | 0                    | 0        |
| L5         | 17              | 0               | 0              | 0              | 0                | 0                | 0         | 0          | 0            | 0             | 0        | 0              | 0       | 0    | 23                       | 0         | 0     | 0                    | 0        |
| L5         | 3               | 0               | 0              | 0              | 0                | 0                | 0         | 0          | 1            | 0             | 0        | 0              | 0       | 0    | 36                       | 0         | 0     | 0                    | 0        |
| L5         | 10              | 0               | 0              | 0              | 0                | 0                | 0         | 0          | 0            | 2             | 0        | 0              | 0       | 0    | 28                       | 0         | 0     | 0                    | 0        |
| L5         | 12              | 0               | 0              | 0              | 0                | 0                | 0         | 0          | 0            | 0             | 0        | 0              | 0       | 0    | 25                       | 0         | 2     | 0                    | 1        |
| L73        | 0               | 0               | 0              | 0              | 9                | 0                | 0         | 0          | 0            | 0             | 0        | 2              | 0       | 0    | 29                       | 0         | 0     | 0                    | 0        |
| L19        | 5               | 0               | 0              | 0              | 0                | 0                | 6         | 0          | 0            | 0             | 0        | 0              | 0       | 0    | 18                       | 0         | 0     | 0                    | 11       |
| L22        | 0               | 0               | 0              | 6              | 6                | 0                | 0         | 5          | 0            | 14            | 0        | 0              | 0       | 0    | 5                        | 0         | 0     | 0                    | 10       |
| L45        | 10              | 0               | 0              | 4              | 4                | 0                | 0         | 0          | 0            | 0             | 0        | 0              | 0       | 0    | 9                        | 0         | 0     | 0                    | 17       |
| L68        | 0               | 0               | 0              | 0              | 0                | 0                | 0         | 0          | 40           | 0             | 0        | 0              | 0       | 0    | 0                        | 0         | 0     | 0                    | 0        |
| L2         | 22              | 0               | 0              | 0              | 0                | 0                | 1         | 0          | 0            | 2             | 0        | 0              | 0       | 0    | 15                       | 0         | 0     | 0                    | 0        |
| L73        | 0               | 12              | 0              | 0              | 0                | 16               | 0         | 0          | 0            | 0             | 0        | 0              | 0       | 0    | 11                       | 0         | 0     | 0                    | 1        |
| L57        | 0               | 0               | 0              | 3              | 3                | 0                | 0         | 0          | 0            | 0             | 0        | 0              | 0       | 0    | 28                       | 0         | 0     | 0                    | 3        |
| L47        | 0               | 0               | 0              | 0              | 0                | 0                | 0         | 0          | 0            | 0             | 0        | 0              | 0       | 0    | 8                        | 0         | 0     | 0                    | 0        |
| L84        | 0               | 12              | 0              | 0              | 0                | 21               | 0         | 0          | 0            | 0             | 0        | 0              | 0       | 0    | 0                        | 0         | 0     | 0                    | 0        |
| L72        | 0               | 0               | 0              | 0              | 28               | 0                | 0         | 0          | 0            | 0             | 0        | 12             | 0       | 0    | 0                        | 0         | 0     | 0                    | 0        |
| L3         | 4               | 12              | 0              | 3              | 3                | 0                | 3         | 0          | 1            | 0             | 0        | 0              | 0       | 0    | 12                       | 0         | 0     | 0                    | 5        |
| L70        | 0               | 0               | 7              | 0              | 0                | 30               | 0         | 0          | 0            | 0             | 0        | 0              | 0       | 0    | 3                        | 0         | 0     | 0                    | 0        |
| L55        | 0               | 7               | 0              | 16             | 16               | 0                | 0         | 0          | 0            | 0             | 0        | 0              | 0       | 0    | 13                       | 0         | 0     | 0                    | 4        |
| L90        | 0               | 0               | 0              | 0              | 0                | 0                | 15        | 0          | 0            | 0             | 0        | 0              | 0       | 0    | 0                        | 0         | 0     | 0                    | 0        |
| L57        | 0               | 0               | 0              | 0              | 7                | 2                | 0         | 0          | 24           | 0             | 0        | 0              | 0       | 0    | 4                        | 0         | 0     | 0                    | 3        |
| L35        | 0               | 0               | 0              | 3              | 3                | 0                | 1         | 0          | 0            | 0             | 0        | 0              | 0       | 0    | 12                       | 0         | 9     | 0                    | 2        |
| L84        | 0               | 0               | 0              | 0              | 30               | 0                | 0         | 0          | 0            | 0             | 2        | 0              | 0       | 0    | 8                        | 0         | 0     | 0                    | 0        |
| L13        | 0               | 14              | 0              | 2              | 2                | 0                | 7         | 0          | 0            | 4             | 0        | 0              | 0       | 0    | 13                       | 0         | 0     | 0                    | 0        |
| L66        | 0               | 0               | 0              | 0              | 0                | 0                | 0         | 0          | 0            | 0             | 0        | 0              | 0       | 0    | 0                        | 0         | 40    | 0                    | 0        |
| L5         | 21              | 0               | 0              | 0              | 0                | 0                | 0         | 0          | 0            | 0             | 0        | 0              | 0       | 0    | 19                       | 0         | 0     | 0                    | 0        |
| L19        | 19              | 0               | 0              | 0              | 0                | 0                | 0         | 0          | 0            | 9             | 0        | 0              | 0       | 0    | 10                       | 0         | 0     | 0                    | 2        |
| L45        | 6               | 0               | 0              | 6              | 6                | 0                | 0         | 0          | 0            | 0             | 0        | 0              | 0       | 0    | 25                       | 0         | 0     | 0                    | 3        |
| L69        | 1               | 0               | 0              | 2              | 2                | 0                | 0         | 0          | 34           | 0             | 0        | 0              | 0       | 0    | 3                        | 0         | 0     | 0                    | 0        |
| L69        | 3               | 0               | 0              | 0              | 0                | 0                | 0         | 0          | 37           | 0             | 0        | 0              | 0       | 0    | 0                        | 0         | 0     | 0                    | 0        |
| L15        | 25              | 6               | 2              | 0              | 0                | 0                | 0         | 1          | 0            | 0             | 0        | 0              | 0       | 0    | 2                        | 0         | 0     | 0                    | 4        |
| L15        | 22              | 0               | 0              | 0              | 0                | 0                | 12        | 0          | 0            | 0             | 0        | 0              | 0       | 0    | 6                        | 0         | 0     | 0                    | 0        |
| L2         | 0               | 1               | 0              | 0              | 0                | 0                | 0         | 0          | 0            | 1             | 0        | 0              | 0       | 0    | 38                       | 0         | 0     | 0                    | 0        |
| L17        | 27              | 0               | 0              | 0              | 0                | 0                | 0         | 0          | 0            | 0             | 0        | 0              | 0       | 0    | 13                       | 0         | 0     | 0                    | 0        |
| L13        | 21              | 9               | 0              | 0              | 0                | 3                | 0         | 0          | 0            | 0             | 0        | 0              | 0       | 0    | 7                        | 0         | 0     | 0                    | 0        |
| L71        | 0               | 40              | 0              | 0              | 0                | 0                | 0         | 0          | 0            | 0             | 0        | 0              | 0       | 0    | 0                        | 0         | 0     | 0                    | 0        |
| L2         | 0               | 7               | 0              | 0              | 0                | 0                | 3         | 0          | 0            | 3             | 0        | 0              | 0       | 0    | 6                        | 0         | 0     | 0                    | 21       |
| L17        | 36              | 0               | 0              | 0              | 0                | 0                | 0         | 0          | 0            | 0             | 0        | 0              | 0       | 0    | 4                        | 0         | 0     | 0                    | 0        |
| L19        | 34              | 0               | 0              | 0              | 0                | 0                | 0         | 0          | 0            | 0             | 0        | 0              | 0       | 0    | 4                        | 0         | 0     | 0                    | 2        |
| L69        | 0               | 0               | 0              | 2              | 2                | 0                | 0         | 0          | 38           | 0             | 0        | 0              | 0       | 0    | 0                        | 0         | 0     | 0                    | 0        |
| L4         | 0               | 0               | 0              | 0              | 0                | 0                | 0         | 0          | 0            | 0             | 0        | 0              | 0       | 0    | 0                        | 0         | 0     | 0                    | 0        |
| L17        | 13              | 0               | 20             | 0              | 0                | 0                | 0         | 0          | 0            | 0             | 0        | 0              | 0       | 0    | 7                        | 0         | 0     | 0                    | 0        |
| L46        | 0               | 0               | 0              | 0              | 0                | 0                | 0         | 0          | 0            | 0             | 0        | 0              | 0       | 0    | 40                       | 0         | 0     | 0                    | 0        |
| L46        | 0               | 40              | 0              | 0              | 0                | 0                | 0         |            |              |               |          |                |         |      |                          |           |       |                      |          |

| Species ID | micro-crustacea | macro-crustacea | micro-bivalvia | macro-bivalvia | micro-gastropoda | macro-gastropoda | Brachyura | Polychaeta | Foraminifera | Echinodermata | Copepoda | gnathid Isopod | Anomura | fish | amorphous organic matter | Black AOM | algae | coral organic matter | sediment |
|------------|-----------------|-----------------|----------------|----------------|------------------|------------------|-----------|------------|--------------|---------------|----------|----------------|---------|------|--------------------------|-----------|-------|----------------------|----------|
| L46        | 8               | 0               | 0              | 0              | 0                | 0                | 0         | 0          | 0            | 18            | 0        | 0              | 0       | 0    | 0                        | 0         | 0     | 0                    | 14       |
| L72        | 0               | 0               | 0              | 0              | 0                | 28               | 0         | 0          | 0            | 0             | 0        | 0              | 0       | 0    | 4                        | 0         | 0     | 0                    | 0        |
| L68        | 0               | 0               | 0              | 8              | 8                | 0                | 0         | 0          | 25           | 0             | 0        | 0              | 0       | 0    | 7                        | 0         | 0     | 0                    | 0        |
| L37        | 0               | 0               | 0              | 0              | 0                | 33               | 0         | 0          | 0            | 0             | 0        | 0              | 0       | 0    | 7                        | 0         | 0     | 0                    | 0        |
| L37        | 0               | 0               | 0              | 3              | 3                | 23               | 11        | 0          | 0            | 0             | 0        | 0              | 0       | 0    | 3                        | 0         | 0     | 0                    | 0        |
| L59        | 0               | 0               | 0              | 0              | 0                | 0                | 40        | 0          | 0            | 0             | 0        | 0              | 0       | 0    | 0                        | 0         | 0     | 0                    | 0        |
| L59        | 0               | 0               | 0              | 0              | 0                | 8                | 31        | 0          | 1            | 0             | 0        | 0              | 0       | 0    | 0                        | 0         | 0     | 0                    | 0        |
| L59        | 0               | 38              | 0              | 0              | 0                | 0                | 0         | 0          | 2            | 0             | 0        | 0              | 0       | 0    | 0                        | 0         | 0     | 0                    | 0        |
| L73        | 0               | 0               | 0              | 0              | 0                | 6                | 0         | 0          | 0            | 0             | 0        | 0              | 2       | 0    | 3                        | 0         | 0     | 0                    | 0        |
| L69        | 0               | 0               | 0              | 2              | 2                | 0                | 0         | 0          | 38           | 0             | 0        | 0              | 0       | 0    | 0                        | 0         | 0     | 0                    | 0        |
| L69        | 2               | 0               | 0              | 0              | 0                | 0                | 0         | 0          | 38           | 0             | 0        | 0              | 0       | 0    | 0                        | 0         | 0     | 0                    | 0        |
| L15        | 0               | 0               | 3              | 0              | 0                | 0                | 0         | 0          | 0            | 0             | 0        | 0              | 0       | 0    | 37                       | 0         | 0     | 0                    | 0        |
| L15        | 12              | 0               | 0              | 0              | 0                | 0                | 0         | 0          | 0            | 1             | 0        | 0              | 0       | 0    | 27                       | 0         | 0     | 0                    | 0        |
| L15        | 16              | 0               | 0              | 8              | 8                | 0                | 0         | 0          | 0            | 0             | 0        | 0              | 0       | 0    | 11                       | 0         | 0     | 0                    | 3        |
| L17        | 0               | 0               | 0              | 0              | 0                | 0                | 0         | 0          | 0            | 0             | 0        | 0              | 0       | 0    | 0                        | 0         | 0     | 0                    | 0        |
| L2         | 21              | 0               | 0              | 6              | 6                | 0                | 0         | 0          | 0            | 0             | 3        | 0              | 0       | 0    | 0                        | 0         | 0     | 0                    | 10       |
| L2         | 34              | 0               | 0              | 0              | 0                | 0                | 0         | 0          | 0            | 0             | 3        | 0              | 0       | 0    | 3                        | 0         | 0     | 0                    | 0        |
| L2         | 0               | 10              | 0              | 0              | 0                | 0                | 0         | 0          | 0            | 0             | 2        | 0              | 0       | 0    | 3                        | 0         | 0     | 0                    | 25       |
| L2         | 31              | 0               | 0              | 0              | 0                | 0                | 0         | 0          | 0            | 0             | 7        | 0              | 0       | 0    | 0                        | 0         | 0     | 0                    | 2        |
| L11        | 0               | 3               | 0              | 0              | 0                | 0                | 0         | 0          | 0            | 9             | 0        | 0              | 0       | 0    | 7                        | 0         | 0     | 0                    | 21       |
| L11        | 30              | 0               | 0              | 0              | 0                | 0                | 0         | 2          | 0            | 4             | 0        | 0              | 0       | 0    | 0                        | 0         | 0     | 0                    | 4        |
| L20        | 29              | 1               | 0              | 2              | 2                | 0                | 0         | 0          | 0            | 8             | 0        | 0              | 0       | 0    | 0                        | 0         | 0     | 0                    | 0        |
| L20        | 0               | 0               | 0              | 1              | 1                | 0                | 0         | 0          | 0            | 12            | 0        | 0              | 0       | 0    | 7                        | 0         | 0     | 0                    | 20       |
| L8         | 33              | 0               | 0              | 0              | 0                | 0                | 0         | 0          | 0            | 0             | 0        | 0              | 0       | 0    | 7                        | 0         | 0     | 0                    | 0        |
| L8         | 0               | 0               | 0              | 0              | 0                | 0                | 0         | 0          | 0            | 0             | 0        | 0              | 0       | 0    | 40                       | 0         | 0     | 0                    | 0        |
| L8         | 33              | 0               | 0              | 0              | 0                | 0                | 0         | 0          | 0            | 0             | 0        | 0              | 0       | 0    | 7                        | 0         | 0     | 0                    | 0        |
| L8         | 4               | 0               | 0              | 0              | 0                | 0                | 0         | 0          | 0            | 0             | 0        | 0              | 0       | 0    | 36                       | 0         | 0     | 0                    | 0        |
| L8         | 30              | 0               | 0              | 0              | 0                | 0                | 0         | 0          | 0            | 0             | 0        | 0              | 0       | 0    | 9                        | 0         | 0     | 0                    | 0        |
| L8         | 22              | 0               | 0              | 0              | 0                | 0                | 0         | 0          | 0            | 0             | 0        | 0              | 0       | 0    | 18                       | 0         | 0     | 0                    | 0        |
| L40        | 1               | 0               | 0              | 0              | 0                | 0                | 0         | 0          | 0            | 0             | 0        | 0              | 0       | 0    | 39                       | 0         | 0     | 0                    | 0        |
| L45        | 23              | 0               | 2              | 6              | 6                | 0                | 0         | 0          | 0            | 0             | 0        | 0              | 0       | 0    | 6                        | 0         | 0     | 0                    | 3        |
| L34        | 0               | 0               | 0              | 0              | 0                | 0                | 40        | 0          | 0            | 0             | 0        | 0              | 0       | 0    | 0                        | 0         | 0     | 0                    | 0        |
| L48        | 0               | 0               | 0              | 0              | 0                | 0                | 0         | 0          | 0            | 0             | 0        | 0              | 0       | 40   | 0                        | 0         | 0     | 0                    | 0        |
| L37        | 0               | 0               | 0              | 3              | 3                | 28               | 5         | 0          | 0            | 0             | 0        | 0              | 0       | 0    | 4                        | 0         | 0     | 0                    | 0        |
| L37        | 0               | 0               | 0              | 3              | 3                | 31               | 0         | 0          | 0            | 0             | 0        | 0              | 0       | 0    | 0                        | 0         | 0     | 0                    | 0        |
| L59        | 0               | 0               | 0              | 0              | 0                | 2                | 24        | 0          | 0            | 0             | 0        | 0              | 0       | 0    | 0                        | 0         | 0     | 0                    | 0        |
| L80        | 0               | 0               | 0              | 0              | 0                | 7                | 29        | 0          | 0            | 0             | 0        | 0              | 0       | 0    | 4                        | 0         | 0     | 0                    | 0        |
| L80        | 0               | 0               | 0              | 0              | 0                | 31               | 0         | 0          | 0            | 0             | 0        | 2              | 0       | 0    | 0                        | 0         | 0     | 0                    | 0        |
| L90        | 0               | 0               | 0              | 0              | 0                | 0                | 0         | 0          | 0            | 0             | 0        | 0              | 0       | 40   | 0                        | 0         | 0     | 0                    | 0        |
| L88        | 0               | 0               | 0              | 0              | 0                | 0                | 0         | 0          | 0            | 0             | 0        | 0              | 0       | 0    | 40                       | 0         | 0     | 0                    | 0        |
| L66        | 0               | 0               | 0              | 0              | 0                | 0                | 0         | 0          | 0            | 0             | 0        | 0              | 0       | 0    | 0                        | 0         | 40    | 0                    | 0        |
| L29        | 0               | 0               | 0              | 21             | 21               | 0                | 0         | 4          | 0            | 0             | 0        | 0              | 0       | 0    | 9                        | 0         | 0     | 0                    | 6        |
| L29        | 0               | 0               | 3              | 0              | 0                | 0                | 0         | 0          | 0            | 0             | 0        | 0              | 0       | 0    | 28                       | 0         | 0     | 0                    | 1        |
| L17        | 0               | 0               | 0              | 0              | 0                | 0                | 0         | 0          | 0            | 35            | 0        | 0              | 0       | 0    | 5                        | 0         | 0     | 0                    | 0        |
| L17        | 0               | 0               | 0              | 0              | 0                | 0                | 1         | 2          | 0            | 35            | 0        | 0              | 0       | 0    | 2                        | 0         | 0     | 0                    | 0        |
| L17        | 3               | 0               | 0              | 0              | 0                | 0                | 0         | 0          | 0            | 37            | 0        | 0              | 0       | 0    | 0                        | 0         | 0     | 0                    | 0        |
| L17        | 0               | 0               | 0              | 0              | 0                | 0                | 0         | 0          | 0            | 2             | 0        | 0              | 0       | 0    | 38                       | 0         | 0     | 0                    | 0        |
| L17        | 0               | 0               | 0              | 0              | 0                | 0                | 0         | 0          | 0            | 35            | 0        | 0              | 0       | 0    | 5                        | 0         | 0     | 0                    | 0        |
| L60        | 0               | 14              | 0              | 11             | 11               | 0                | 12        | 0          | 0            | 0             | 0        | 0              | 0       | 0    | 0                        | 0         | 0     | 0                    | 3        |
| L60        | 0               | 25              | 0              | 2              | 2                | 0                | 0         | 0          | 0            | 11            | 0        | 0              | 0       | 0    | 0                        | 0         | 0     | 0                    | 2        |
| L60        | 4               | 0               | 7              | 3              | 3                | 0                | 0         | 0          | 0            | 8             | 0        | 0              | 0       | 0    | 0                        | 0         | 0     | 0                    | 18       |
| L60        | 2               | 0               | 0              | 25             | 25               | 0                | 0         | 7          | 0            | 0             | 0        | 0              | 0       | 0    | 4                        | 0         | 0     | 0                    | 2        |
| L60        | 11              | 0               | 0              | 22             | 22               | 0                | 0         | 2          | 0            | 0             | 1        | 0              | 0       | 0    | 3                        | 0         | 0     | 0                    | 1        |
| L92        | 0               | 0               | 0              | 0              | 0                | 0                | 0         | 0          | 37           | 0             | 0        | 0              | 0       | 0    | 1                        | 0         | 0     | 0                    | 2        |
| L92        | 0               | 0               | 0              | 32             | 32               | 0                | 0         | 0          | 0            | 6             | 0        | 0              | 0       | 0    | 1                        | 0         | 0     | 0                    | 1        |
| L92        | 0               | 0               | 0              | 0              | 0                | 0                | 0         | 0          | 40           | 0             | 0        | 0              | 0       | 0    | 0                        | 0         | 0     | 0                    | 0        |
| L92        | 0               | 0               | 0              | 5              | 5                | 0                | 0         | 0          | 35           | 0             | 0        | 0              | 0       | 0    | 0                        | 0         | 0     | 0                    | 0        |
| L11        | 26              | 1               | 0              | 2              | 2                | 0                | 0         | 3          | 0            | 0             | 0        | 0              | 0       | 0    | 8                        | 0         | 0     | 0                    | 0        |
| L7         | 22              | 0               | 0              | 0              | 0                | 0                | 0         | 0          | 0            | 0             | 0        | 0              | 0       | 0    | 18                       | 0         | 0     | 0                    | 0        |
| L7         | 7               | 0               | 0              | 0              | 0                | 0                | 0         | 2          | 0            | 0             | 0        | 0              | 0       | 0    | 31                       | 0         | 0     | 0                    | 0        |
| L86        | 0               | 0               | 0              | 0              | 0                | 0                | 0         | 0          | 0            | 0             | 0        | 0              | 0       | 0    | 0                        | 0         | 0     | 40                   | 0        |
| L86        | 0               | 0               | 0              | 0              | 0                | 0                | 0         | 0          | 0            | 0             | 0        | 0              | 0       | 0    | 0                        | 0         | 0     | 40                   | 0        |
| L40        | 0               | 0               | 0              | 0              | 0                | 0                | 0         | 0          | 0            | 0             | 40       | 0              | 0       | 0    | 0                        | 0         | 0     | 0                    | 0        |
| L51        | 0               | 33              | 0              | 0              | 0                | 0                | 0         | 0          | 0            | 0             | 0        | 0              | 0       | 0    | 7                        | 0         | 0     | 0                    | 0        |
| L51        | 0               | 37              | 0              | 0              | 0                | 0                | 0         | 0          | 0            | 0             | 0        | 0              | 0       | 0    | 3                        | 0         | 0     | 0                    | 0        |
| L61        | 0               | 40              | 0              | 0              | 0                | 0                | 0         | 0          | 0            | 0             | 0        | 0              | 0       | 0    | 0                        | 0         | 0     | 0                    | 0        |
| L93        | 0               | 25              | 0              | 2              | 2                | 0                | 0         | 0          | 0            | 13            | 0        | 0              | 0       | 0    | 0                        | 0         | 0     | 0                    | 0        |
| L2         | 35              | 2               | 0              | 0              | 0                | 0                | 0         | 0          | 0            | 2             | 0        | 0              | 0       | 0    | 0                        | 0         | 0     | 0                    | 1        |
| L2         | 35              | 1               | 0              | 0              | 0                | 0                | 0         | 3          | 0            | 0             | 0        | 0              | 0       | 0    | 0                        | 0         | 0     | 0                    | 1        |
| L75        | 0               | 0               | 0              | 0              | 0                | 0                | 0         | 0          | 0            | 0             | 0        | 0              | 0       | 0    | 0                        | 0         | 0     | 0                    | 0        |
| L55        | 0               | 0               | 0              | 0              | 0                | 37               | 0         | 0          | 0            | 0             | 0        | 0              | 0       | 0    | 3                        | 0         | 0     | 0                    | 0        |
| L4         | 0               | 30              | 0              | 0              | 0                | 0                | 0         | 0          | 0            | 0             | 0        | 0              | 0       | 0    | 10                       | 0         | 0     | 0                    | 0        |
| L4         | 0               | 0               | 0              | 0              | 0                | 0                | 0         | 0          | 0            | 0             | 0        | 0              | 0       | 6    | 14                       | 0         | 0     | 0                    | 15       |
| L4         | 0               | 24              | 0              | 1              | 1                | 0                | 12        | 0          | 0            | 0             | 0        | 0              | 0       | 0    | 3                        | 0         | 0     | 0                    | 0        |
| L76        | 0               | 0               | 0              | 0              | 0                | 25               | 0         | 0          | 0            | 0             | 0        | 0              | 0       | 0    | 2                        | 0         | 0     | 0                    | 6        |
| L76        | 0               | 0               | 0              | 28             | 28               | 4                | 0         | 0          | 0            | 0             | 0        | 0              | 0       | 0    | 1                        | 0         | 0     | 0                    | 7        |
| L35        | 21              | 0               | 0              | 3              | 3                | 0                | 0         | 10         | 0            | 0             | 0        | 0              | 0       | 0    | 6                        | 0         | 0     | 0                    | 0        |
| L77        | 0               | 0               | 0              | 0              | 0                | 0                | 0         | 0          | 0            | 0             | 0        | 0              | 0       | 0    | 3                        | 0         | 0     | 0                    | 5        |
| L78        | 0               | 0               | 0              | 0              | 0                | 2                | 0         | 0          | 0            | 0             | 0        | 0              | 0       | 0    | 0                        | 0         | 0     | 0                    | 6        |
| L4         | 0               | 38              | 0              | 0              | 0                | 0                | 0         | 0          | 2            | 0             | 0        | 0              | 0       | 0    | 0                        | 0         | 0     | 0                    | 0        |
| L4         | 34              | 0               | 0              | 0              | 0                | 0                | 0         | 0          | 0            | 0             | 0        | 0              | 0       | 0    | 6                        | 0         | 0     | 0                    | 0        |
| L4         | 0               | 40              | 0              | 0              | 0                | 0                | 0         | 0          | 0            | 0             | 0        | 0              | 0       | 0    | 0                        | 0         | 0     | 0                    | 0        |
| L85        | 0               | 0               | 0              | 0              | 0                | 0                | 0         | 0          | 0            | 0             | 0        | 0              | 0       | 0    | 37                       | 0         | 0     | 0                    | 3        |
| L53        | 0               | 5               | 0              | 0              | 0                | 0                | 0         | 0          | 0            | 0             | 0        | 0              | 0       | 0    | 3                        | 0         | 0     | 0                    | 32       |
| L60        | 0               | 0               | 0              | 7              | 7                | 0                | 0         | 0          | 1            | 30            | 0        | 0              | 0       | 0    | 0                        | 0         | 0     | 0                    | 2        |
| L53        | 0               | 0               | 0              | 0              | 0                | 0                | 0         | 0          | 0            | 0             | 0        | 0              | 0       | 0    | 23                       | 0         | 0     | 0                    | 17       |
| L60        | 3               | 0               | 0              | 6              | 6                | 0                | 0         | 0          | 0            | 0             | 0        | 0              | 0       | 0    | 31                       | 0         | 0     | 0                    | 0        |
| L53        | 2               | 0               | 0              | 7              | 7                | 0                | 0         | 0          | 0            | 0             | 0        | 0              | 0       | 0    | 3                        | 0         | 0     | 0                    | 28       |
| L51        | 0               | 6               | 0              | 0              | 0                | 0                | 0         | 0          | 0            | 0             | 0        | 0              | 0       | 0    | 28                       | 6         | 0     | 0                    | 0        |
| L53        | 27              | 0               | 0              | 0              | 0                | 0                | 0         | 0          | 13           | 0             | 0        | 0              | 0       | 0    | 0                        | 0         | 0     | 0                    | 0        |
| L60        | 2               | 0               | 0              | 36             | 36               | 0                | 0         | 0          | 1            | 0             | 0        | 0              | 0       | 0    | 0                        | 0         | 0     | 0                    | 1        |
| L53        | 6               | 0               | 0              | 0              | 0                | 0                | 0         | 0          | 0            | 0             | 0        | 0              | 0       | 0    | 34                       | 0         | 0     | 0                    | 0        |
| L53        | 0               | 0               | 0              | 0              | 0                | 0                | 0         | 40         | 0            | 0             | 0        | 0              | 0       | 0    | 0                        | 0         | 0     | 0                    | 0        |
| L2         | 16              | 2               | 0              | 1              | 1                | 0                | 0         | 9          | 0            | 0             | 12       | 0              | 0       | 0    | 0                        | 0         | 0     | 0                    | 0        |
| L53        | 0               | 0               | 0              | 0              | 0                | 0                | 0         | 0          | 0            | 0             | 0        | 0              | 0       | 0    | 40                       | 0         | 0     | 0                    | 0        |
| L60        | 0               | 7               | 2              | 31             | 31               | 0                | 0         | 0          | 0            | 0             |          |                |         |      |                          |           |       |                      |          |



| Species ID | micro-crustacea | macro-crustacea | micro-bivalvia | macro-bivalvia | micro-gastropoda | macro-gastropoda | Brachyura | Polychaeta | Foraminifera | Echinodermata | Copepoda | gnathid Isopod | Anomura | fish | amorphous organic matter | Black AOM | algae | coral organic matter | sediment |
|------------|-----------------|-----------------|----------------|----------------|------------------|------------------|-----------|------------|--------------|---------------|----------|----------------|---------|------|--------------------------|-----------|-------|----------------------|----------|
| L42        | 0               | 3               | 25             | 10             | 10               | 0                | 0         | 0          | 0            | 0             | 0        | 0              | 0       | 0    | 0                        | 0         | 0     | 0                    | 2        |
| L42        | 11              | 0               | 0              | 23             | 23               | 0                | 0         | 0          | 0            | 0             | 0        | 0              | 0       | 0    | 3                        | 0         | 0     | 0                    | 3        |
| L42        | 0               | 0               | 0              | 24             | 24               | 0                | 0         | 0          | 0            | 0             | 0        | 0              | 0       | 0    | 6                        | 0         | 0     | 0                    | 10       |
| L42        | 0               | 0               | 0              | 10             | 10               | 0                | 0         | 0          | 0            | 22            | 0        | 0              | 0       | 0    | 0                        | 0         | 0     | 0                    | 8        |
| L42        | 0               | 0               | 0              | 40             | 40               | 0                | 0         | 0          | 0            | 0             | 0        | 0              | 0       | 0    | 0                        | 0         | 0     | 0                    | 0        |
| L42        | 0               | 0               | 0              | 40             | 40               | 0                | 0         | 0          | 0            | 0             | 0        | 0              | 0       | 0    | 0                        | 0         | 0     | 0                    | 0        |
| L42        | 0               | 0               | 0              | 37             | 37               | 0                | 0         | 0          | 0            | 0             | 0        | 0              | 0       | 0    | 0                        | 0         | 0     | 0                    | 3        |
| L42        | 0               | 0               | 0              | 35             | 35               | 0                | 0         | 0          | 0            | 0             | 0        | 0              | 0       | 0    | 2                        | 0         | 0     | 0                    | 3        |
| L42        | 0               | 8               | 0              | 29             | 29               | 0                | 0         | 0          | 0            | 0             | 0        | 0              | 0       | 0    | 0                        | 0         | 0     | 0                    | 3        |
| L18        | 27              | 0               | 0              | 1              | 1                | 0                | 0         | 0          | 0            | 0             | 0        | 0              | 0       | 0    | 11                       | 0         | 0     | 0                    | 1        |
| L32        | 24              | 2               | 0              | 0              | 0                | 0                | 6         | 7          | 0            | 0             | 0        | 0              | 0       | 0    | 0                        | 0         | 0     | 0                    | 1        |
| L84        | 0               | 15              | 0              | 0              | 0                | 13               | 0         | 0          | 0            | 0             | 0        | 0              | 0       | 0    | 0                        | 0         | 0     | 0                    | 1        |
| L49        | 0               | 0               | 0              | 0              | 0                | 0                | 0         | 0          | 0            | 0             | 0        | 0              | 0       | 0    | 0                        | 40        | 0     | 0                    | 0        |
| L49        | 0               | 0               | 0              | 0              | 0                | 0                | 0         | 0          | 0            | 0             | 0        | 0              | 0       | 0    | 0                        | 40        | 0     | 0                    | 0        |
| L70        | 0               | 0               | 0              | 0              | 0                | 0                | 23        | 0          | 0            | 0             | 0        | 0              | 0       | 0    | 6                        | 0         | 0     | 0                    | 0        |
| L94        | 0               | 10              | 0              | 0              | 0                | 0                | 17        | 0          | 0            | 5             | 0        | 0              | 0       | 0    | 0                        | 0         | 0     | 0                    | 0        |
| L41        | 0               | 7               | 0              | 0              | 0                | 0                | 0         | 0          | 0            | 15            | 0        | 0              | 0       | 0    | 15                       | 0         | 0     | 0                    | 3        |
| L41        | 0               | 40              | 0              | 0              | 0                | 0                | 0         | 0          | 0            | 0             | 0        | 0              | 0       | 0    | 0                        | 0         | 0     | 0                    | 0        |
| L41        | 0               | 0               | 0              | 0              | 0                | 0                | 0         | 0          | 0            | 0             | 0        | 0              | 0       | 40   | 0                        | 0         | 0     | 0                    | 0        |
| L41        | 14              | 0               | 0              | 20             | 20               | 0                | 0         | 0          | 0            | 0             | 0        | 0              | 0       | 0    | 6                        | 0         | 0     | 0                    | 0        |
| L41        | 0               | 15              | 0              | 0              | 0                | 0                | 9         | 0          | 0            | 0             | 0        | 0              | 0       | 0    | 0                        | 0         | 0     | 0                    | 1        |
| L41        | 0               | 0               | 0              | 0              | 0                | 0                | 21        | 0          | 1            | 2             | 0        | 0              | 0       | 0    | 14                       | 0         | 0     | 0                    | 2        |
| L15        | 21              | 6               | 0              | 1              | 1                | 0                | 0         | 1          | 0            | 0             | 0        | 0              | 0       | 0    | 8                        | 0         | 0     | 0                    | 3        |
| L15        | 25              | 7               | 0              | 0              | 0                | 0                | 0         | 0          | 0            | 0             | 0        | 0              | 0       | 0    | 6                        | 0         | 0     | 0                    | 2        |
| L90        | 0               | 0               | 0              | 0              | 0                | 0                | 0         | 0          | 0            | 0             | 0        | 0              | 0       | 40   | 0                        | 0         | 0     | 0                    | 0        |
| L70        | 0               | 34              | 0              | 0              | 0                | 0                | 0         | 0          | 0            | 0             | 0        | 0              | 0       | 0    | 3                        | 0         | 0     | 0                    | 3        |
| L16        | 26              | 0               | 0              | 0              | 0                | 0                | 0         | 0          | 0            | 14            | 0        | 0              | 0       | 0    | 0                        | 0         | 0     | 0                    | 0        |
| L54        | 0               | 0               | 0              | 0              | 0                | 0                | 33        | 0          | 0            | 0             | 0        | 0              | 0       | 7    | 0                        | 0         | 0     | 0                    | 0        |
| L68        | 0               | 0               | 0              | 9              | 9                | 0                | 0         | 0          | 0            | 0             | 0        | 0              | 0       | 0    | 0                        | 28        | 0     | 0                    | 3        |
| L68        | 0               | 0               | 0              | 10             | 10               | 0                | 0         | 0          | 0            | 0             | 0        | 0              | 0       | 0    | 0                        | 30        | 0     | 0                    | 0        |
| L68        | 0               | 0               | 0              | 15             | 15               | 0                | 0         | 0          | 0            | 0             | 0        | 0              | 0       | 0    | 0                        | 25        | 0     | 0                    | 0        |
| L68        | 0               | 0               | 0              | 1              | 1                | 0                | 0         | 0          | 0            | 0             | 0        | 0              | 0       | 0    | 6                        | 33        | 0     | 0                    | 0        |
| L32        | 22              | 0               | 0              | 6              | 6                | 0                | 0         | 0          | 0            | 0             | 0        | 5              | 0       | 0    | 0                        | 0         | 0     | 0                    | 7        |
| L27        | 33              | 0               | 0              | 0              | 0                | 0                | 0         | 0          | 0            | 0             | 0        | 0              | 0       | 0    | 3                        | 0         | 0     | 0                    | 4        |
| L18        | 25              | 9               | 0              | 0              | 0                | 0                | 0         | 0          | 0            | 0             | 0        | 0              | 0       | 0    | 4                        | 0         | 0     | 0                    | 2        |
| L18        | 29              | 3               | 0              | 0              | 0                | 0                | 0         | 0          | 0            | 0             | 0        | 0              | 0       | 0    | 4                        | 0         | 0     | 0                    | 4        |
| L64        | 0               | 11              | 0              | 0              | 0                | 0                | 0         | 0          | 0            | 29            | 0        | 0              | 0       | 0    | 0                        | 0         | 0     | 0                    | 0        |
| L64        | 0               | 0               | 0              | 0              | 0                | 0                | 20        | 0          | 0            | 0             | 0        | 0              | 20      | 0    | 0                        | 0         | 0     | 0                    | 0        |
| L64        | 0               | 31              | 0              | 0              | 0                | 0                | 0         | 0          | 0            | 0             | 0        | 0              | 0       | 0    | 9                        | 0         | 0     | 0                    | 0        |
| L64        | 0               | 0               | 0              | 0              | 0                | 0                | 40        | 0          | 0            | 0             | 0        | 0              | 0       | 0    | 0                        | 0         | 0     | 0                    | 0        |
| L22        | 0               | 0               | 0              | 5              | 5                | 0                | 21        | 0          | 0            | 5             | 0        | 0              | 0       | 0    | 0                        | 0         | 0     | 0                    | 4        |
| L22        | 20              | 0               | 0              | 11             | 11               | 0                | 0         | 0          | 0            | 6             | 0        | 0              | 0       | 0    | 3                        | 0         | 0     | 0                    | 0        |
| L22        | 0               | 0               | 0              | 31             | 31               | 0                | 0         | 0          | 0            | 7             | 0        | 0              | 0       | 0    | 0                        | 0         | 0     | 0                    | 2        |
| L22        | 39              | 0               | 0              | 1              | 1                | 0                | 0         | 0          | 0            | 0             | 0        | 0              | 0       | 0    | 0                        | 0         | 0     | 0                    | 0        |
| L7         | 0               | 0               | 0              | 8              | 8                | 0                | 0         | 0          | 0            | 0             | 0        | 0              | 0       | 0    | 31                       | 0         | 0     | 0                    | 1        |
| L15        | 35              | 0               | 0              | 0              | 0                | 0                | 0         | 0          | 0            | 0             | 0        | 0              | 0       | 0    | 2                        | 0         | 0     | 0                    | 3        |
| L8         | 38              | 0               | 0              | 0              | 0                | 0                | 0         | 0          | 0            | 0             | 0        | 0              | 0       | 0    | 0                        | 0         | 0     | 0                    | 2        |
| L41        | 6               | 0               | 7              | 16             | 16               | 0                | 0         | 0          | 0            | 0             | 0        | 0              | 0       | 0    | 5                        | 0         | 0     | 0                    | 6        |
| L63        | 0               | 3               | 0              | 0              | 0                | 8                | 12        | 6          | 0            | 0             | 0        | 0              | 0       | 0    | 11                       | 0         | 0     | 0                    | 0        |
| L63        | 0               | 14              | 0              | 0              | 0                | 0                | 10        | 0          | 0            | 0             | 0        | 0              | 0       | 0    | 0                        | 0         | 0     | 0                    | 0        |
| L40        | 0               | 0               | 0              | 0              | 0                | 0                | 0         | 0          | 0            | 0             | 0        | 1              | 0       | 0    | 39                       | 0         | 0     | 0                    | 0        |
| L40        | 13              | 0               | 0              | 0              | 0                | 0                | 0         | 0          | 0            | 0             | 21       | 0              | 0       | 0    | 6                        | 0         | 0     | 0                    | 0        |
| L27        | 3               | 0               | 0              | 22             | 22               | 0                | 0         | 0          | 0            | 0             | 0        | 0              | 0       | 0    | 9                        | 0         | 0     | 0                    | 3        |
| L27        | 6               | 0               | 0              | 34             | 34               | 0                | 0         | 0          | 0            | 0             | 0        | 0              | 0       | 0    | 0                        | 0         | 0     | 0                    | 0        |
| L55        | 0               | 25              | 0              | 4              | 4                | 0                | 0         | 0          | 0            | 0             | 0        | 0              | 0       | 0    | 7                        | 0         | 0     | 0                    | 4        |
| L55        | 0               | 20              | 0              | 20             | 20               | 0                | 0         | 0          | 0            | 0             | 0        | 0              | 0       | 0    | 0                        | 0         | 0     | 0                    | 0        |
| L42        | 0               | 0               | 0              | 36             | 36               | 0                | 0         | 0          | 0            | 0             | 0        | 0              | 0       | 0    | 0                        | 0         | 0     | 0                    | 4        |
| L42        | 0               | 0               | 0              | 34             | 34               | 0                | 0         | 0          | 0            | 1             | 0        | 0              | 2       | 0    | 0                        | 0         | 0     | 0                    | 3        |
| L35        | 6               | 0               | 0              | 8              | 8                | 0                | 0         | 18         | 0            | 0             | 0        | 0              | 0       | 0    | 3                        | 0         | 0     | 0                    | 5        |
| L35        | 0               | 0               | 0              | 2              | 2                | 0                | 0         | 36         | 0            | 0             | 0        | 0              | 0       | 0    | 0                        | 0         | 0     | 0                    | 2        |
| L57        | 0               | 0               | 0              | 0              | 0                | 0                | 0         | 0          | 0            | 0             | 0        | 0              | 0       | 0    | 7                        | 0         | 0     | 0                    | 0        |
| L40        | 10              | 0               | 0              | 0              | 0                | 0                | 0         | 0          | 0            | 0             | 0        | 0              | 0       | 0    | 30                       | 0         | 0     | 0                    | 0        |
| L18        | 19              | 0               | 0              | 1              | 1                | 0                | 16        | 0          | 0            | 0             | 0        | 0              | 0       | 0    | 0                        | 0         | 0     | 0                    | 4        |
| L18        | 28              | 9               | 0              | 0              | 0                | 0                | 0         | 0          | 0            | 0             | 0        | 0              | 0       | 0    | 0                        | 0         | 0     | 0                    | 3        |
| L18        | 18              | 0               | 0              | 0              | 0                | 0                | 8         | 13         | 0            | 0             | 0        | 0              | 0       | 0    | 0                        | 0         | 0     | 0                    | 1        |
| L63        | 0               | 16              | 0              | 0              | 0                | 7                | 6         | 0          | 0            | 0             | 0        | 0              | 0       | 0    | 0                        | 0         | 0     | 0                    | 0        |
| L63        | 8               | 0               | 0              | 22             | 22               | 6                | 2         | 0          | 0            | 0             | 0        | 0              | 0       | 0    | 2                        | 0         | 0     | 0                    | 0        |
| L68        | 0               | 0               | 0              | 10             | 10               | 0                | 0         | 0          | 13           | 0             | 0        | 0              | 0       | 0    | 0                        | 0         | 0     | 0                    | 17       |
| L68        | 1               | 0               | 0              | 2              | 2                | 0                | 0         | 3          | 0            | 0             | 0        | 0              | 0       | 0    | 0                        | 0         | 0     | 0                    | 34       |
| L22        | 0               | 0               | 0              | 29             | 29               | 0                | 0         | 0          | 4            | 0             | 0        | 0              | 0       | 0    | 6                        | 0         | 0     | 0                    | 1        |
| L16        | 38              | 0               | 0              | 0              | 0                | 0                | 0         | 0          | 0            | 0             | 2        | 0              | 0       | 0    | 0                        | 0         | 0     | 0                    | 0        |
| L27        | 0               | 22              | 6              | 8              | 8                | 0                | 0         | 0          | 0            | 0             | 0        | 0              | 0       | 0    | 4                        | 0         | 0     | 0                    | 0        |
| L84        | 0               | 0               | 0              | 0              | 0                | 3                | 0         | 0          | 0            | 0             | 0        | 0              | 0       | 0    | 20                       | 0         | 0     | 0                    | 3        |
| L63        | 6               | 0               | 0              | 28             | 28               | 0                | 0         | 0          | 0            | 0             | 0        | 0              | 0       | 0    | 6                        | 0         | 0     | 0                    | 0        |
| L63        | 14              | 0               | 0              | 0              | 0                | 0                | 0         | 0          | 0            | 0             | 0        | 0              | 26      | 0    | 0                        | 0         | 0     | 0                    | 0        |
| L63        | 0               | 0               | 3              | 0              | 0                | 0                | 37        | 0          | 0            | 0             | 0        | 0              | 0       | 0    | 0                        | 0         | 0     | 0                    | 0        |
| L63        | 0               | 40              | 0              | 0              | 0                | 0                | 0         | 0          | 0            | 0             | 0        | 0              | 0       | 0    | 0                        | 0         | 0     | 0                    | 0        |
| L27        | 0               | 2               | 0              | 7              | 7                | 0                | 0         | 0          | 0            | 6             | 0        | 0              | 0       | 0    | 15                       | 0         | 0     | 0                    | 6        |
| L27        | 21              | 0               | 1              | 1              | 1                | 0                | 0         | 0          | 0            | 0             | 0        | 0              | 0       | 0    | 4                        | 0         | 0     | 0                    | 3        |
| L27        | 0               | 6               | 0              | 17             | 17               | 0                | 0         | 0          | 0            | 0             | 0        | 0              | 0       | 0    | 6                        | 0         | 0     | 0                    | 11       |
| L27        | 0               | 11              | 0              | 6              | 6                | 0                | 0         | 0          | 0            | 7             | 0        | 0              | 0       | 0    | 8                        | 0         | 0     | 0                    | 5        |
| L27        | 0               | 17              | 0              | 3              | 3                | 0                | 0         | 0          | 0            | 2             | 0        | 0              | 0       | 0    | 12                       | 0         | 0     | 0                    | 6        |
| L27        | 12              | 6               | 0              | 1              | 1                | 0                | 0         | 0          | 0            | 0             | 0        | 0              | 0       | 0    | 16                       | 0         | 0     | 0                    | 1        |
| L80        | 0               | 31              | 0              | 0              | 0                | 0                | 0         | 0          | 0            | 0             | 0        | 9              | 0       | 0    | 0                        | 0         | 0     | 0                    | 0        |
| L80        | 0               | 0               | 0              | 0              | 0                | 0                | 0         | 0          | 0            | 34            | 0        | 0              | 0       | 0    | 0                        | 0         | 0     | 0                    | 6        |
| L94        | 0               | 40              | 0              | 0              | 0                | 0                | 0         | 0          | 0            | 0             | 0        | 0              | 0       | 0    | 0                        | 0         | 0     | 0                    | 0        |
| L80        | 0               | 0               | 0              | 0              | 0                | 24               | 0         | 0          | 0            | 0             | 0        | 0              | 14      | 0    | 0                        | 0         | 0     | 0                    | 2        |
| L80        | 0               | 0               | 0              | 3              | 3                | 14               | 6         | 0          | 0            | 0             | 0        | 0              | 0       | 0    | 0                        | 0         | 0     | 0                    | 3        |
| L59        | 0               | 0               | 0              | 0              | 0                | 1                | 16        | 0          | 0            | 20            | 0        | 0              | 0       | 0    | 0                        | 0         | 0     | 0                    | 3        |
| L90        | 0               | 40              | 0              | 0              | 0                | 0                | 0         | 0          | 0            | 0             | 0        | 0              | 0       | 0    | 0                        | 0         | 0     | 0                    | 0        |
| L22        | 0               | 0               | 0              | 2              | 2                | 0                | 28        | 0          | 0            | 10            | 0        | 0              | 0       | 0    | 0                        | 0         | 0     | 0                    | 0        |
| L22        | 0               | 40              | 0              | 0              | 0                | 0                | 0         | 0          | 0            | 0             | 0        | 0              | 0       | 0    | 0                        | 0         | 0     | 0                    | 0        |
| L22        | 0               | 0               | 0              | 37             | 37               | 0                | 0         | 0          | 0            | 0             | 0        | 0              | 0       | 0    | 3                        | 0         | 0     | 0                    | 0        |
| L22        | 0               | 0               | 0              | 4              | 4                | 0                | 30        | 0          | 0            | 0             | 0        | 0              | 0       | 0    | 6                        | 0         | 0     | 0                    | 0        |
| L22        | 2               | 0               | 7              | 27             | 27               | 0                | 0         | 0          | 0            | 0             | 0        | 0              | 0       | 0    | 4                        | 0         | 0     | 0                    | 0        |
| L22        | 0               | 38              |                |                |                  |                  |           |            |              |               |          |                |         |      |                          |           |       |                      |          |

| Species ID | micro-crustacea | macro-crustacea | micro-bivalvia | macro-bivalvia | micro-gastropoda | macro-gastropoda | Brachyura | Polychaeta | Foraminifera | Echinodermata | Copepoda | gnathid Isopod | Anomura | fish | amorphous organic matter | Black AOM | algae | coral organic matter | sediment |
|------------|-----------------|-----------------|----------------|----------------|------------------|------------------|-----------|------------|--------------|---------------|----------|----------------|---------|------|--------------------------|-----------|-------|----------------------|----------|
| L22        | 31              | 1               | 0              | 7              | 7                | 0                | 0         | 0          | 0            | 0             | 1        | 0              | 0       | 0    | 0                        | 0         | 0     | 0                    | 0        |
| L22        | 21              | 2               | 4              | 10             | 10               | 0                | 0         | 0          | 0            | 0             | 0        | 0              | 0       | 0    | 3                        | 0         | 0     | 0                    | 0        |
| L7         | 23              | 0               | 0              | 0              | 0                | 0                | 10        | 0          | 0            | 0             | 0        | 0              | 0       | 0    | 7                        | 0         | 0     | 0                    | 0        |
| L7         | 26              | 0               | 0              | 0              | 0                | 0                | 0         | 0          | 0            | 0             | 0        | 0              | 0       | 0    | 14                       | 0         | 0     | 0                    | 0        |
| L7         | 26              | 0               | 0              | 7              | 7                | 0                | 6         | 0          | 0            | 0             | 0        | 0              | 0       | 0    | 0                        | 0         | 0     | 0                    | 1        |
| L37        | 0               | 3               | 0              | 37             | 37               | 0                | 0         | 0          | 0            | 0             | 0        | 0              | 0       | 0    | 0                        | 0         | 0     | 0                    | 0        |
| L68        | 0               | 0               | 0              | 0              | 0                | 0                | 0         | 0          | 0            | 0             | 0        | 0              | 0       | 0    | 0                        | 0         | 0     | 0                    | 0        |
| L68        | 0               | 0               | 0              | 22             | 22               | 0                | 0         | 0          | 0            | 0             | 0        | 0              | 0       | 0    | 0                        | 0         | 0     | 0                    | 18       |
| L68        | 0               | 0               | 0              | 19             | 19               | 0                | 0         | 0          | 0            | 0             | 0        | 0              | 0       | 0    | 0                        | 0         | 0     | 0                    | 21       |
| L27        | 0               | 7               | 0              | 16             | 16               | 0                | 0         | 0          | 0            | 0             | 0        | 0              | 0       | 0    | 12                       | 0         | 0     | 0                    | 0        |
| L27        | 0               | 6               | 0              | 16             | 16               | 0                | 0         | 0          | 0            | 0             | 0        | 0              | 0       | 0    | 12                       | 0         | 0     | 0                    | 6        |
| L63        | 0               | 0               | 0              | 0              | 0                | 0                | 0         | 0          | 0            | 0             | 0        | 0              | 0       | 0    | 0                        | 0         | 0     | 0                    | 0        |
| L91        | 0               | 0               | 0              | 0              | 0                | 0                | 0         | 0          | 0            | 0             | 0        | 0              | 0       | 0    | 32                       | 0         | 0     | 0                    | 8        |
| L94        | 0               | 0               | 0              | 0              | 0                | 0                | 0         | 0          | 0            | 0             | 0        | 0              | 0       | 40   | 0                        | 0         | 0     | 0                    | 0        |
| L91        | 0               | 0               | 0              | 0              | 0                | 0                | 0         | 0          | 0            | 0             | 0        | 0              | 0       | 0    | 22                       | 0         | 0     | 0                    | 18       |
| L91        | 0               | 0               | 0              | 0              | 0                | 0                | 2         | 0          | 0            | 0             | 0        | 0              | 0       | 0    | 19                       | 0         | 0     | 0                    | 19       |
| L50        | 26              | 0               | 0              | 0              | 0                | 0                | 0         | 0          | 0            | 0             | 0        | 0              | 0       | 0    | 14                       | 0         | 0     | 0                    | 0        |
| L50        | 0               | 0               | 0              | 0              | 0                | 0                | 0         | 0          | 0            | 0             | 33       | 0              | 0       | 0    | 7                        | 0         | 0     | 0                    | 0        |
| L50        | 0               | 23              | 0              | 4              | 4                | 0                | 0         | 0          | 0            | 0             | 0        | 0              | 0       | 0    | 3                        | 0         | 0     | 0                    | 5        |
| L24        | 11              | 1               | 0              | 0              | 0                | 0                | 0         | 0          | 0            | 0             | 0        | 0              | 0       | 0    | 21                       | 0         | 0     | 0                    | 7        |
| L24        | 28              | 3               | 3              | 2              | 2                | 0                | 0         | 0          | 1            | 0             | 0        | 0              | 0       | 0    | 3                        | 0         | 0     | 0                    | 0        |
| L24        | 19              | 5               | 0              | 4              | 4                | 1                | 0         | 0          | 0            | 0             | 0        | 0              | 0       | 0    | 9                        | 0         | 0     | 0                    | 2        |
| L31        | 0               | 0               | 6              | 13             | 13               | 0                | 0         | 0          | 0            | 19            | 0        | 0              | 0       | 0    | 0                        | 0         | 0     | 0                    | 2        |
| L52        | 0               | 0               | 0              | 14             | 14               | 0                | 0         | 0          | 0            | 0             | 0        | 0              | 0       | 14   | 12                       | 0         | 0     | 0                    | 0        |
| L52        | 0               | 0               | 0              | 20             | 20               | 0                | 0         | 3          | 0            | 3             | 0        | 0              | 0       | 9    | 4                        | 0         | 0     | 0                    | 1        |
| L52        | 0               | 6               | 0              | 0              | 0                | 0                | 0         | 7          | 0            | 0             | 0        | 0              | 0       | 0    | 27                       | 0         | 0     | 0                    | 0        |
| L52        | 0               | 0               | 0              | 7              | 7                | 0                | 0         | 3          | 4            | 0             | 0        | 0              | 0       | 0    | 7                        | 0         | 0     | 0                    | 19       |
| L52        | 24              | 0               | 0              | 1              | 1                | 0                | 0         | 8          | 0            | 0             | 1        | 0              | 0       | 0    | 4                        | 0         | 0     | 0                    | 2        |
| L52        | 0               | 24              | 0              | 0              | 0                | 0                | 0         | 0          | 2            | 9             | 1        | 0              | 0       | 0    | 4                        | 0         | 0     | 0                    | 0        |
| L52        | 0               | 28              | 2              | 0              | 0                | 0                | 0         | 0          | 0            | 0             | 5        | 0              | 0       | 0    | 5                        | 0         | 0     | 0                    | 0        |
| L32        | 0               | 18              | 0              | 7              | 7                | 0                | 5         | 0          | 0            | 0             | 0        | 0              | 0       | 0    | 10                       | 0         | 0     | 0                    | 0        |
| L24        | 0               | 0               | 4              | 3              | 3                | 0                | 0         | 9          | 2            | 0             | 0        | 0              | 0       | 0    | 6                        | 0         | 0     | 0                    | 16       |
| L24        | 27              | 2               | 0              | 0              | 0                | 0                | 0         | 0          | 1            | 0             | 0        | 0              | 0       | 0    | 3                        | 0         | 0     | 0                    | 1        |
| L24        | 11              | 0               | 0              | 6              | 6                | 0                | 0         | 0          | 7            | 0             | 0        | 0              | 0       | 0    | 9                        | 0         | 0     | 0                    | 5        |
| L45        | 0               | 7               | 0              | 26             | 26               | 1                | 0         | 2          | 0            | 0             | 0        | 0              | 0       | 0    | 0                        | 0         | 0     | 0                    | 4        |
| L24        | 31              | 0               | 1              | 0              | 0                | 0                | 0         | 0          | 0            | 0             | 0        | 0              | 0       | 0    | 8                        | 0         | 0     | 0                    | 0        |
| L24        | 0               | 14              | 0              | 0              | 0                | 0                | 0         | 0          | 3            | 0             | 0        | 0              | 0       | 0    | 6                        | 0         | 0     | 0                    | 17       |
| L24        | 7               | 0               | 0              | 0              | 0                | 0                | 0         | 0          | 9            | 0             | 0        | 0              | 0       | 0    | 21                       | 0         | 0     | 0                    | 3        |
| L24        | 19              | 0               | 0              | 0              | 0                | 0                | 0         | 7          | 0            | 0             | 0        | 0              | 0       | 0    | 11                       | 0         | 0     | 0                    | 3        |
| L51        | 0               | 0               | 0              | 0              | 0                | 0                | 0         | 0          | 0            | 0             | 0        | 0              | 0       | 0    | 0                        | 40        | 0     | 0                    | 0        |
| L51        | 0               | 0               | 0              | 0              | 0                | 0                | 0         | 0          | 0            | 0             | 0        | 0              | 0       | 0    | 0                        | 40        | 0     | 0                    | 0        |
| L90        | 0               | 0               | 0              | 0              | 0                | 0                | 0         | 0          | 0            | 0             | 0        | 0              | 0       | 40   | 0                        | 0         | 0     | 0                    | 0        |
| L90        | 0               | 0               | 0              | 0              | 0                | 0                | 0         | 0          | 0            | 0             | 0        | 0              | 0       | 0    | 0                        | 0         | 0     | 0                    | 0        |
| L35        | 0               | 0               | 0              | 17             | 17               | 0                | 0         | 0          | 0            | 0             | 0        | 0              | 0       | 0    | 9                        | 0         | 7     | 0                    | 5        |
| L25        | 0               | 0               | 36             | 0              | 0                | 0                | 0         | 0          | 0            | 0             | 0        | 0              | 0       | 0    | 4                        | 0         | 0     | 0                    | 0        |
| L25        | 0               | 0               | 6              | 0              | 0                | 0                | 0         | 0          | 0            | 16            | 0        | 0              | 0       | 0    | 18                       | 0         | 0     | 0                    | 0        |
| L25        | 0               | 0               | 13             | 0              | 0                | 0                | 0         | 0          | 0            | 0             | 0        | 0              | 0       | 0    | 0                        | 0         | 0     | 0                    | 11       |
| L25        | 13              | 0               | 0              | 0              | 0                | 0                | 0         | 5          | 0            | 0             | 0        | 0              | 0       | 0    | 6                        | 0         | 0     | 0                    | 14       |
| L35        | 3               | 2               | 0              | 0              | 0                | 0                | 0         | 3          | 1            | 0             | 0        | 0              | 0       | 0    | 3                        | 0         | 0     | 0                    | 21       |
| L50        | 0               | 0               | 0              | 0              | 0                | 40               | 0         | 0          | 0            | 0             | 0        | 0              | 0       | 0    | 0                        | 0         | 0     | 0                    | 0        |
| L50        | 0               | 12              | 0              | 2              | 2                | 0                | 0         | 0          | 0            | 0             | 0        | 0              | 0       | 0    | 26                       | 0         | 0     | 0                    | 0        |
| L25        | 3               | 0               | 10             | 1              | 1                | 0                | 0         | 0          | 0            | 0             | 0        | 0              | 0       | 0    | 2                        | 0         | 0     | 0                    | 24       |
| L61        | 15              | 0               | 0              | 5              | 5                | 0                | 0         | 2          | 0            | 0             | 0        | 0              | 0       | 0    | 16                       | 0         | 0     | 0                    | 2        |
| L24        | 16              | 0               | 0              | 9              | 9                | 0                | 0         | 0          | 0            | 0             | 0        | 0              | 0       | 0    | 6                        | 0         | 0     | 0                    | 8        |
| L24        | 24              | 0               | 0              | 0              | 0                | 0                | 0         | 0          | 0            | 0             | 0        | 0              | 0       | 0    | 16                       | 0         | 0     | 0                    | 0        |
| L24        | 10              | 0               | 0              | 9              | 9                | 0                | 0         | 0          | 0            | 0             | 0        | 0              | 0       | 0    | 8                        | 0         | 0     | 0                    | 13       |
| L35        | 0               | 0               | 0              | 0              | 0                | 0                | 0         | 0          | 0            | 0             | 0        | 0              | 0       | 0    | 27                       | 0         | 1     | 0                    | 9        |
| L35        | 5               | 0               | 0              | 1              | 1                | 0                | 0         | 0          | 0            | 0             | 0        | 0              | 0       | 0    | 18                       | 0         | 2     | 0                    | 12       |
| L35        | 31              | 0               | 0              | 0              | 0                | 0                | 0         | 0          | 0            | 0             | 0        | 0              | 0       | 0    | 6                        | 0         | 0     | 0                    | 0        |
| L35        | 0               | 0               | 2              | 1              | 1                | 0                | 0         | 4          | 0            | 0             | 0        | 0              | 0       | 0    | 23                       | 0         | 0     | 0                    | 7        |
| L35        | 34              | 0               | 0              | 0              | 0                | 0                | 0         | 0          | 0            | 0             | 0        | 0              | 0       | 0    | 5                        | 0         | 0     | 0                    | 0        |
| L50        | 0               | 0               | 0              | 12             | 12               | 0                | 11        | 0          | 0            | 0             | 0        | 0              | 0       | 0    | 17                       | 0         | 0     | 0                    | 0        |
| L40        | 0               | 0               | 0              | 0              | 0                | 0                | 0         | 0          | 0            | 0             | 37       | 0              | 0       | 0    | 1                        | 0         | 0     | 0                    | 0        |
| L49        | 0               | 0               | 0              | 0              | 0                | 0                | 0         | 0          | 0            | 0             | 0        | 0              | 0       | 0    | 18                       | 22        | 0     | 0                    | 0        |
| L63        | 0               | 40              | 0              | 0              | 0                | 0                | 0         | 0          | 0            | 0             | 0        | 0              | 0       | 0    | 0                        | 0         | 0     | 0                    | 0        |
| L56        | 0               | 0               | 0              | 17             | 17               | 0                | 0         | 0          | 0            | 19            | 0        | 0              | 0       | 0    | 1                        | 0         | 0     | 0                    | 3        |
| L56        | 0               | 10              | 0              | 18             | 18               | 3                | 0         | 0          | 0            | 6             | 0        | 0              | 0       | 0    | 0                        | 0         | 0     | 0                    | 3        |
| L51        | 0               | 0               | 0              | 0              | 0                | 0                | 0         | 0          | 0            | 0             | 0        | 28             | 0       | 0    | 12                       | 0         | 0     | 0                    | 0        |
| L66        | 0               | 0               | 0              | 0              | 0                | 0                | 0         | 0          | 0            | 0             | 0        | 0              | 0       | 0    | 0                        | 0         | 0     | 40                   | 0        |
| L66        | 0               | 0               | 0              | 0              | 0                | 0                | 0         | 0          | 0            | 0             | 0        | 0              | 0       | 0    | 3                        | 0         | 0     | 37                   | 0        |
| L36        | 2               | 0               | 0              | 19             | 19               | 0                | 0         | 0          | 0            | 0             | 0        | 0              | 0       | 0    | 19                       | 0         | 0     | 0                    | 0        |
| L29        | 12              | 0               | 0              | 0              | 0                | 0                | 0         | 0          | 0            | 0             | 0        | 0              | 0       | 0    | 17                       | 0         | 0     | 0                    | 11       |
| L59        | 0               | 40              | 0              | 0              | 0                | 0                | 0         | 0          | 0            | 0             | 0        | 0              | 0       | 0    | 0                        | 0         | 0     | 0                    | 0        |
| L11        | 28              | 0               | 2              | 3              | 3                | 0                | 0         | 0          | 0            | 0             | 0        | 0              | 0       | 0    | 5                        | 0         | 0     | 0                    | 2        |
| L20        | 21              | 0               | 0              | 0              | 0                | 0                | 0         | 0          | 0            | 0             | 0        | 0              | 0       | 0    | 5                        | 0         | 0     | 0                    | 14       |
| L11        | 25              | 0               | 0              | 2              | 2                | 0                | 0         | 0          | 0            | 0             | 0        | 0              | 0       | 0    | 12                       | 0         | 0     | 0                    | 1        |
| L11        | 25              | 1               | 2              | 0              | 0                | 0                | 0         | 0          | 0            | 0             | 0        | 0              | 0       | 0    | 9                        | 0         | 0     | 0                    | 3        |
| L11        | 24              | 2               | 0              | 1              | 1                | 0                | 0         | 0          | 0            | 0             | 0        | 0              | 0       | 0    | 10                       | 0         | 0     | 0                    | 3        |
| L11        | 33              | 1               | 0              | 0              | 0                | 0                | 1         | 0          | 0            | 0             | 0        | 0              | 0       | 0    | 4                        | 0         | 0     | 0                    | 1        |
| L11        | 23              | 1               | 1              | 0              | 0                | 0                | 0         | 0          | 0            | 0             | 0        | 0              | 0       | 0    | 13                       | 0         | 0     | 0                    | 2        |
| L66        | 0               | 0               | 0              | 0              | 0                | 0                | 0         | 0          | 0            | 0             | 0        | 0              | 0       | 0    | 8                        | 0         | 0     | 32                   | 0        |
| L40        | 0               | 0               | 0              | 0              | 0                | 0                | 0         | 0          | 0            | 0             | 0        | 35             | 0       | 0    | 3                        | 0         | 0     | 0                    | 0        |
| L40        | 0               | 0               | 0              | 0              | 0                | 0                | 0         | 0          | 0            | 0             | 40       | 0              | 0       | 0    | 0                        | 0         | 0     | 0                    | 0        |
| L14        | 35              | 2               | 0              | 0              | 0                | 0                | 0         | 0          | 0            | 0             | 0        | 0              | 0       | 0    | 0                        | 0         | 0     | 0                    | 3        |
| L90        | 0               | 40              | 0              | 0              | 0                | 0                | 0         | 0          | 0            | 0             | 0        | 0              | 0       | 0    | 0                        | 0         | 0     | 0                    | 0        |
| L36        | 0               | 8               | 0              | 32             | 32               | 0                | 0         | 0          | 0            | 0             | 0        | 0              | 0       | 0    | 0                        | 0         | 0     | 0                    | 0        |
| L36        | 0               | 0               | 0              | 31             | 31               | 0                | 0         | 0          | 0            | 0             | 0        | 0              | 0       | 0    | 9                        | 0         | 0     | 0                    | 0        |
| L91        | 0               | 0               | 0              | 0              | 0                | 0                | 0         | 0          | 0            | 0             | 0        | 0              | 0       | 0    | 18                       | 0         | 0     | 0                    | 22       |
| L51        | 0               | 0               | 0              | 0              | 0                | 0                | 0         | 0          | 0            | 0             | 37       | 0              | 0       | 0    | 1                        | 0         | 0     | 0                    | 0        |
| L51        | 0               | 0               | 0              | 0              | 0                | 0                | 0         | 0          | 0            | 0             | 1        | 0              | 0       | 0    | 39                       | 0         | 0     | 0                    | 0        |
| L49        | 6               | 0               | 0              | 0              | 0                | 0                | 0         | 0          | 0            | 0             | 0        | 0              | 0       | 0    | 34                       | 0         | 0     | 0                    | 0        |
| L49        | 2               | 0               | 0              | 0              | 0                | 0                | 0         | 0          | 0            | 0             | 0        | 0              | 0       | 0    | 8                        | 30        | 0     | 0                    | 0        |
| L61        | 1               | 8               | 0              | 0              | 0                | 0                | 0         | 7          | 0            | 0             | 0        | 0              | 0       | 0    | 18                       | 0         | 0     | 0                    | 6        |
| L61        | 0               | 0               | 0              | 0              | 0                | 0                | 0         | 0          | 0            | 0             | 0        | 0              | 0       | 0    | 37                       | 0         | 0     | 0                    | 3        |
| L66        | 0               | 0               | 0              | 0              | 0                | 0                | 0         | 0          | 0            | 0             | 0        | 0              | 0       | 0    | 0                        | 0         | 0     | 39                   | 1        |
| L66        | 0               | 0               | 0              |                |                  |                  |           |            |              |               |          |                |         |      |                          |           |       |                      |          |



| Species ID | micro-crustacea | macro-crustacea | micro-bivalvia | macro-bivalvia | micro-gastropoda | macro-gastropoda | Brachyura | Polychaeta | Foraminifera | Echinodermata | Copepoda | gnathid Isopod | Anomura | fish | amorphous organic matter | Black AOM | algae | coral organic matter | sediment |
|------------|-----------------|-----------------|----------------|----------------|------------------|------------------|-----------|------------|--------------|---------------|----------|----------------|---------|------|--------------------------|-----------|-------|----------------------|----------|
| L50        | 0               | 29              | 0              | 3              | 3                | 0                | 0         | 0          | 0            | 0             | 0        | 0              | 0       | 0    | 8                        | 0         | 0     | 0                    | 0        |
| L40        | 0               | 0               | 0              | 0              | 0                | 0                | 0         | 0          | 0            | 0             | 0        | 26             | 0       | 0    | 14                       | 0         | 0     | 0                    | 0        |
| L40        | 0               | 0               | 0              | 0              | 0                | 0                | 0         | 0          | 0            | 0             | 0        | 27             | 0       | 0    | 10                       | 0         | 0     | 0                    | 0        |
| L40        | 0               | 0               | 0              | 0              | 0                | 0                | 0         | 0          | 0            | 0             | 0        | 32             | 0       | 0    | 6                        | 0         | 0     | 0                    | 0        |
| L48        | 0               | 8               | 0              | 0              | 0                | 0                | 0         | 0          | 0            | 0             | 0        | 0              | 0       | 32   | 0                        | 0         | 0     | 0                    | 0        |
| L42        | 0               | 0               | 0              | 18             | 18               | 0                | 0         | 13         | 0            | 0             | 0        | 0              | 0       | 0    | 6                        | 0         | 0     | 0                    | 3        |
| L91        | 0               | 0               | 0              | 0              | 0                | 0                | 0         | 0          | 0            | 0             | 0        | 0              | 0       | 0    | 7                        | 0         | 0     | 0                    | 33       |
| L91        | 0               | 0               | 0              | 0              | 0                | 0                | 0         | 0          | 0            | 0             | 0        | 0              | 0       | 0    | 6                        | 0         | 0     | 0                    | 34       |
| L8         | 33              | 1               | 0              | 0              | 0                | 0                | 0         | 0          | 0            | 0             | 2        | 0              | 0       | 0    | 4                        | 0         | 0     | 0                    | 0        |
| L90        | 0               | 40              | 0              | 0              | 0                | 0                | 0         | 0          | 0            | 0             | 0        | 0              | 0       | 0    | 0                        | 0         | 0     | 0                    | 0        |
| L72        | 0               | 0               | 0              | 0              | 0                | 24               | 0         | 0          | 0            | 0             | 0        | 0              | 14      | 0    | 2                        | 0         | 0     | 0                    | 0        |
| L62        | 0               | 0               | 0              | 0              | 0                | 0                | 0         | 0          | 0            | 35            | 0        | 0              | 0       | 0    | 5                        | 0         | 0     | 0                    | 0        |
| L62        | 0               | 13              | 0              | 0              | 0                | 0                | 0         | 0          | 0            | 18            | 0        | 0              | 0       | 0    | 0                        | 0         | 0     | 0                    | 4        |
| L62        | 0               | 7               | 0              | 0              | 0                | 10               | 0         | 0          | 0            | 23            | 0        | 0              | 0       | 0    | 0                        | 0         | 0     | 0                    | 0        |
| L62        | 0               | 40              | 0              | 0              | 0                | 0                | 0         | 0          | 0            | 0             | 0        | 0              | 0       | 0    | 0                        | 0         | 0     | 0                    | 0        |
| L62        | 0               | 0               | 0              | 0              | 0                | 14               | 0         | 0          | 0            | 0             | 0        | 0              | 0       | 0    | 26                       | 0         | 0     | 0                    | 0        |
| L91        | 0               | 0               | 0              | 0              | 0                | 0                | 0         | 0          | 1            | 0             | 0        | 0              | 0       | 0    | 9                        | 0         | 0     | 0                    | 30       |
| L87        | 0               | 0               | 0              | 0              | 0                | 0                | 0         | 0          | 0            | 0             | 0        | 1              | 0       | 0    | 0                        | 0         | 0     | 39                   | 0        |
| L87        | 0               | 0               | 0              | 0              | 0                | 0                | 0         | 0          | 0            | 0             | 0        | 0              | 0       | 0    | 0                        | 0         | 0     | 40                   | 0        |
| L87        | 0               | 0               | 0              | 0              | 0                | 0                | 0         | 0          | 0            | 0             | 0        | 0              | 0       | 0    | 0                        | 0         | 0     | 40                   | 0        |
| L87        | 0               | 0               | 0              | 0              | 0                | 0                | 0         | 0          | 0            | 0             | 0        | 0              | 0       | 0    | 0                        | 0         | 0     | 40                   | 0        |
| L87        | 0               | 0               | 0              | 0              | 0                | 0                | 0         | 0          | 0            | 0             | 0        | 0              | 0       | 0    | 0                        | 0         | 0     | 40                   | 0        |
| L31        | 0               | 0               | 8              | 24             | 24               | 6                | 0         | 0          | 0            | 0             | 0        | 0              | 0       | 0    | 0                        | 0         | 0     | 0                    | 2        |
| L51        | 0               | 0               | 0              | 24             | 0                | 0                | 0         | 0          | 0            | 0             | 0        | 0              | 0       | 0    | 9                        | 31        | 0     | 0                    | 0        |
| L51        | 0               | 0               | 0              | 0              | 0                | 0                | 0         | 0          | 0            | 0             | 0        | 20             | 0       | 0    | 8                        | 12        | 0     | 0                    | 0        |
| L87        | 0               | 0               | 0              | 0              | 0                | 0                | 0         | 0          | 0            | 0             | 0        | 3              | 0       | 0    | 0                        | 0         | 0     | 37                   | 0        |
| L87        | 0               | 0               | 0              | 0              | 0                | 0                | 0         | 0          | 0            | 0             | 0        | 0              | 0       | 0    | 0                        | 0         | 0     | 40                   | 0        |
| L87        | 0               | 0               | 0              | 0              | 0                | 0                | 0         | 0          | 0            | 0             | 0        | 0              | 0       | 0    | 0                        | 0         | 0     | 40                   | 0        |
| L87        | 0               | 0               | 0              | 0              | 0                | 0                | 0         | 0          | 0            | 0             | 0        | 0              | 0       | 0    | 0                        | 0         | 0     | 40                   | 0        |
| L9         | 26              | 0               | 0              | 0              | 0                | 0                | 0         | 0          | 0            | 0             | 1        | 0              | 0       | 0    | 0                        | 0         | 0     | 0                    | 13       |
| L9         | 16              | 0               | 3              | 5              | 5                | 0                | 7         | 0          | 0            | 0             | 0        | 0              | 0       | 0    | 0                        | 0         | 0     | 0                    | 9        |
| L72        | 0               | 0               | 0              | 0              | 0                | 15               | 0         | 0          | 0            | 0             | 0        | 0              | 22      | 0    | 3                        | 0         | 0     | 0                    | 0        |
| L50        | 25              | 0               | 0              | 0              | 0                | 15               | 0         | 0          | 0            | 0             | 0        | 0              | 0       | 0    | 0                        | 0         | 0     | 0                    | 0        |
| L22        | 29              | 0               | 0              | 3              | 3                | 0                | 0         | 0          | 0            | 0             | 0        | 0              | 0       | 0    | 6                        | 0         | 0     | 0                    | 0        |
| L90        | 0               | 0               | 0              | 0              | 0                | 0                | 0         | 0          | 0            | 0             | 0        | 0              | 0       | 40   | 0                        | 0         | 0     | 0                    | 0        |
| L70        | 0               | 0               | 0              | 0              | 0                | 0                | 0         | 0          | 0            | 35            | 0        | 0              | 0       | 0    | 5                        | 0         | 0     | 0                    | 0        |
| L87        | 0               | 0               | 0              | 0              | 0                | 0                | 0         | 0          | 0            | 0             | 0        | 0              | 0       | 0    | 0                        | 0         | 0     | 39                   | 1        |
| L66        | 0               | 0               | 0              | 0              | 0                | 0                | 0         | 0          | 0            | 0             | 0        | 0              | 0       | 0    | 0                        | 0         | 0     | 40                   | 0        |
| L59        | 0               | 0               | 0              | 0              | 0                | 2                | 38        | 0          | 0            | 0             | 0        | 0              | 0       | 0    | 0                        | 0         | 0     | 0                    | 0        |
| L72        | 0               | 0               | 0              | 0              | 0                | 3                | 0         | 0          | 0            | 34            | 0        | 0              | 1       | 0    | 2                        | 0         | 0     | 0                    | 0        |
| L37        | 0               | 16              | 4              | 18             | 18               | 0                | 0         | 0          | 0            | 0             | 0        | 0              | 0       | 0    | 2                        | 0         | 0     | 0                    | 0        |
| L91        | 0               | 0               | 0              | 0              | 0                | 0                | 0         | 0          | 0            | 0             | 0        | 0              | 0       | 0    | 23                       | 0         | 0     | 0                    | 17       |
| L91        | 0               | 0               | 0              | 0              | 0                | 0                | 0         | 0          | 0            | 0             | 0        | 0              | 0       | 0    | 27                       | 0         | 0     | 0                    | 13       |
| L90        | 0               | 40              | 0              | 0              | 0                | 0                | 0         | 0          | 0            | 0             | 0        | 0              | 0       | 0    | 0                        | 0         | 0     | 0                    | 0        |
| L34        | 0               | 10              | 0              | 0              | 0                | 24               | 0         | 0          | 0            | 6             | 0        | 0              | 0       | 0    | 0                        | 0         | 0     | 0                    | 0        |
| L62        | 6               | 0               | 0              | 12             | 12               | 4                | 0         | 0          | 0            | 18            | 0        | 0              | 0       | 0    | 0                        | 0         | 0     | 0                    | 0        |
| L62        | 13              | 0               | 0              | 15             | 15               | 0                | 0         | 0          | 0            | 0             | 0        | 0              | 0       | 0    | 12                       | 0         | 0     | 0                    | 0        |
| L33        | 0               | 5               | 0              | 32             | 32               | 0                | 0         | 0          | 0            | 0             | 0        | 0              | 0       | 0    | 0                        | 0         | 0     | 0                    | 3        |
| L78        | 0               | 0               | 0              | 36             | 36               | 0                | 0         | 0          | 0            | 0             | 0        | 2              | 0       | 0    | 2                        | 0         | 0     | 0                    | 0        |
| L31        | 0               | 0               | 0              | 14             | 14               | 0                | 0         | 0          | 0            | 0             | 0        | 0              | 0       | 0    | 7                        | 0         | 0     | 0                    | 19       |
| L5         | 18              | 0               | 0              | 0              | 0                | 0                | 0         | 0          | 0            | 0             | 0        | 0              | 0       | 0    | 22                       | 0         | 0     | 0                    | 0        |
| L5         | 40              | 0               | 0              | 0              | 0                | 0                | 0         | 0          | 0            | 0             | 0        | 0              | 0       | 0    | 0                        | 0         | 0     | 0                    | 0        |
| L5         | 40              | 0               | 0              | 0              | 0                | 0                | 0         | 0          | 0            | 0             | 0        | 0              | 0       | 0    | 0                        | 0         | 0     | 0                    | 0        |
| L70        | 0               | 0               | 0              | 0              | 0                | 0                | 0         | 0          | 0            | 40            | 0        | 0              | 0       | 0    | 0                        | 0         | 0     | 0                    | 0        |
| L70        | 0               | 0               | 0              | 0              | 0                | 0                | 0         | 0          | 0            | 7             | 0        | 0              | 0       | 0    | 5                        | 0         | 0     | 0                    | 0        |
| L70        | 0               | 24              | 0              | 0              | 0                | 0                | 0         | 0          | 0            | 13            | 0        | 0              | 0       | 0    | 3                        | 0         | 0     | 0                    | 0        |
| L70        | 0               | 0               | 0              | 0              | 0                | 0                | 0         | 0          | 0            | 33            | 0        | 0              | 0       | 0    | 7                        | 0         | 0     | 0                    | 0        |
| L46        | 0               | 12              | 0              | 6              | 6                | 0                | 0         | 1          | 21           | 0             | 0        | 0              | 0       | 0    | 0                        | 0         | 0     | 0                    | 0        |
| L46        | 32              | 0               | 5              | 0              | 0                | 0                | 0         | 0          | 0            | 0             | 0        | 0              | 0       | 0    | 3                        | 0         | 0     | 0                    | 0        |
| L46        | 0               | 33              | 0              | 0              | 0                | 0                | 0         | 0          | 0            | 0             | 0        | 0              | 0       | 0    | 7                        | 0         | 0     | 0                    | 0        |
| L46        | 0               | 8               | 0              | 0              | 0                | 0                | 3         | 0          | 0            | 0             | 0        | 0              | 0       | 0    | 29                       | 0         | 0     | 0                    | 0        |
| L46        | 25              | 0               | 11             | 0              | 0                | 0                | 0         | 1          | 0            | 0             | 0        | 0              | 0       | 0    | 3                        | 0         | 0     | 0                    | 0        |
| L46        | 34              | 0               | 0              | 0              | 0                | 0                | 0         | 0          | 0            | 0             | 0        | 0              | 0       | 0    | 6                        | 0         | 0     | 0                    | 0        |
| L46        | 0               | 0               | 17             | 0              | 0                | 0                | 0         | 0          | 0            | 0             | 0        | 0              | 0       | 0    | 19                       | 0         | 0     | 0                    | 0        |
| L26        | 23              | 0               | 0              | 0              | 0                | 0                | 0         | 0          | 0            | 0             | 0        | 0              | 0       | 0    | 0                        | 0         | 0     | 0                    | 17       |
| L87        | 0               | 0               | 0              | 0              | 0                | 0                | 0         | 0          | 0            | 0             | 0        | 0              | 0       | 0    | 0                        | 0         | 0     | 40                   | 0        |
| L2         | 15              | 8               | 0              | 0              | 0                | 0                | 0         | 11         | 0            | 0             | 0        | 0              | 0       | 0    | 2                        | 0         | 0     | 0                    | 4        |
| L2         | 31              | 1               | 0              | 0              | 0                | 0                | 0         | 0          | 0            | 1             | 0        | 0              | 0       | 0    | 7                        | 0         | 0     | 0                    | 0        |
| L18        | 11              | 4               | 0              | 9              | 9                | 0                | 0         | 1          | 2            | 0             | 0        | 0              | 0       | 0    | 11                       | 0         | 0     | 0                    | 2        |
| L62        | 0               | 0               | 0              | 0              | 0                | 14               | 0         | 0          | 0            | 16            | 0        | 0              | 0       | 0    | 10                       | 0         | 0     | 0                    | 0        |
| L62        | 0               | 7               | 0              | 0              | 0                | 0                | 23        | 0          | 0            | 10            | 0        | 0              | 0       | 0    | 0                        | 0         | 0     | 0                    | 0        |
| L9         | 25              | 0               | 3              | 0              | 0                | 0                | 1         | 0          | 0            | 0             | 0        | 0              | 0       | 0    | 2                        | 0         | 0     | 0                    | 9        |
| L9         | 22              | 4               | 0              | 0              | 0                | 0                | 0         | 0          | 3            | 0             | 0        | 0              | 0       | 0    | 9                        | 0         | 0     | 0                    | 2        |
| L69        | 0               | 0               | 0              | 2              | 2                | 0                | 0         | 0          | 29           | 0             | 0        | 0              | 0       | 0    | 0                        | 0         | 0     | 0                    | 9        |
| L69        | 0               | 0               | 0              | 3              | 3                | 0                | 0         | 0          | 30           | 0             | 0        | 0              | 0       | 0    | 0                        | 0         | 0     | 0                    | 7        |
| L69        | 0               | 0               | 0              | 0              | 0                | 0                | 0         | 0          | 28           | 0             | 0        | 0              | 0       | 0    | 0                        | 0         | 0     | 0                    | 12       |
| L69        | 0               | 0               | 0              | 0              | 0                | 0                | 0         | 0          | 20           | 0             | 0        | 0              | 0       | 0    | 0                        | 0         | 0     | 0                    | 20       |
| L69        | 0               | 0               | 0              | 0              | 0                | 0                | 0         | 0          | 12           | 0             | 0        | 0              | 0       | 0    | 21                       | 0         | 0     | 0                    | 7        |
| L69        | 0               | 0               | 0              | 0              | 0                | 0                | 0         | 0          | 36           | 0             | 0        | 0              | 0       | 0    | 0                        | 0         | 0     | 0                    | 4        |
| L69        | 0               | 0               | 0              | 1              | 1                | 0                | 0         | 0          | 36           | 0             | 0        | 0              | 0       | 0    | 0                        | 0         | 0     | 0                    | 3        |
| L26        | 0               | 0               | 0              | 0              | 0                | 0                | 0         | 0          | 0            | 0             | 0        | 0              | 0       | 0    | 36                       | 0         | 0     | 0                    | 4        |
| L78        | 0               | 0               | 0              | 0              | 0                | 9                | 0         | 0          | 0            | 0             | 0        | 5              | 0       | 0    | 19                       | 0         | 0     | 0                    | 0        |
| L78        | 0               | 0               | 0              | 0              | 0                | 0                | 0         | 0          | 0            | 0             | 0        | 0              | 0       | 0    | 11                       | 0         | 0     | 0                    | 0        |
| L78        | 0               | 21              | 0              | 0              | 0                | 0                | 0         | 0          | 0            | 0             | 0        | 0              | 0       | 0    | 9                        | 0         | 0     | 0                    | 0        |
| L9         | 27              | 7               | 0              | 0              | 0                | 0                | 4         | 0          | 0            | 0             | 0        | 0              | 0       | 0    | 0                        | 0         | 0     | 0                    | 2        |
| L83        | 0               | 3               | 0              | 1              | 1                | 28               | 0         | 0          | 0            | 0             | 0        | 0              | 0       | 0    | 6                        | 0         | 0     | 0                    | 2        |
| L24        | 6               | 1               | 0              | 9              | 9                | 0                | 0         | 0          | 0            | 0             | 0        | 0              | 0       | 0    | 8                        | 0         | 0     | 0                    | 16       |
| L45        | 0               | 0               | 5              | 13             | 13               | 0                | 0         | 0          | 0            | 0             | 0        | 0              | 0       | 0    | 19                       | 0         | 0     | 0                    | 3        |
| L90        | 0               | 0               | 0              | 0              | 0                | 0                | 0         | 0          | 0            | 0             | 0        | 0              | 0       | 0    | 0                        | 0         | 0     | 0                    | 0        |
| L90        | 0               | 0               | 0              | 0              | 0                | 0                | 0         | 0          | 0            | 0             | 0        | 0              | 0       | 40   | 0                        | 0         | 0     | 0                    | 0        |
| L26        | 18              | 0               | 0              | 10             | 10               | 0                | 0         | 6          | 0            | 0             | 0        | 0              | 0       | 0    | 6                        | 0         | 0     | 0                    | 0        |
| L26        | 11              | 0               | 0              | 14             | 14               | 0                | 0         | 2          | 0            | 0             | 0        | 0              | 0       | 0    | 6                        | 0         | 0     | 0                    | 7        |
| L26        | 24              | 0               | 0              | 10             | 10               | 0                | 0         | 0          | 0            | 0             | 0        | 0              | 0       | 0    | 0                        | 0         | 0     | 0                    | 6        |
| L26        | 18              | 4               | 0              | 14             | 14               | 0                | 0         | 1          | 0            | 0             | 0        | 0              | 0       | 0    | 2                        | 0         | 0     | 0                    | 1        |
| L1         | 40              | 0               | 0              | 0              | 0                | 0                | 0         | 0          | 0            | 0             | 0        | 0              | 0       | 0    | 0                        | 0         | 0     | 0                    | 0        |
| L1         | 33              | 0               | 0              | 0              | 0</              |                  |           |            |              |               |          |                |         |      |                          |           |       |                      |          |



| Species ID | micro-crustacea | macro-crustacea | micro-bivalvia | macro-bivalvia | micro-gastropoda | macro-gastropoda | Brachyura | Polychaeta | Foraminifera | Echinodermata | Copepoda | Gnathid Isopod | Anomura | fish | amorphous organic matter | Black AOM | algae | coral organic matter | sediment |
|------------|-----------------|-----------------|----------------|----------------|------------------|------------------|-----------|------------|--------------|---------------|----------|----------------|---------|------|--------------------------|-----------|-------|----------------------|----------|
| L64        | 0               | 0               | 0              | 0              | 0                | 0                | 40        | 0          | 0            | 0             | 0        | 0              | 0       | 0    | 0                        | 0         | 0     | 0                    | 0        |
| L41        | 0               | 38              | 0              | 2              | 2                | 0                | 0         | 0          | 0            | 0             | 0        | 0              | 0       | 0    | 0                        | 0         | 0     | 0                    | 0        |
| L37        | 0               | 23              | 5              | 9              | 9                | 0                | 0         | 0          | 0            | 0             | 0        | 0              | 0       | 0    | 0                        | 0         | 0     | 0                    | 3        |
| L41        | 0               | 5               | 0              | 9              | 9                | 0                | 16        | 0          | 0            | 0             | 0        | 0              | 0       | 0    | 6                        | 0         | 0     | 0                    | 4        |
| L49        | 0               | 0               | 0              | 0              | 0                | 0                | 0         | 0          | 0            | 0             | 0        | 0              | 0       | 0    | 40                       | 0         | 0     | 0                    | 0        |
| L14        | 25              | 3               | 0              | 3              | 3                | 0                | 0         | 0          | 0            | 0             | 6        | 0              | 0       | 0    | 0                        | 0         | 0     | 0                    | 3        |
| L63        | 0               | 0               | 0              | 9              | 9                | 0                | 19        | 12         | 0            | 0             | 0        | 0              | 0       | 0    | 0                        | 0         | 0     | 0                    | 0        |
| L67        | 0               | 0               | 0              | 0              | 0                | 0                | 0         | 0          | 0            | 0             | 0        | 0              | 0       | 0    | 0                        | 0         | 0     | 0                    | 0        |
| L67        | 0               | 0               | 0              | 0              | 0                | 0                | 40        | 0          | 0            | 0             | 0        | 0              | 0       | 0    | 0                        | 0         | 0     | 0                    | 0        |
| L67        | 0               | 0               | 0              | 0              | 0                | 0                | 0         | 0          | 0            | 40            | 0        | 0              | 0       | 0    | 0                        | 0         | 0     | 0                    | 0        |
| L67        | 0               | 0               | 0              | 0              | 0                | 0                | 6         | 0          | 0            | 34            | 0        | 0              | 0       | 0    | 0                        | 0         | 0     | 0                    | 0        |
| L67        | 0               | 0               | 0              | 0              | 0                | 0                | 40        | 0          | 0            | 0             | 0        | 0              | 0       | 0    | 0                        | 0         | 0     | 0                    | 0        |
| L67        | 0               | 0               | 0              | 0              | 0                | 0                | 40        | 0          | 0            | 0             | 0        | 0              | 0       | 0    | 0                        | 0         | 0     | 0                    | 0        |
| L67        | 0               | 0               | 0              | 0              | 0                | 0                | 40        | 0          | 0            | 0             | 0        | 0              | 0       | 0    | 0                        | 0         | 0     | 0                    | 0        |
| L67        | 0               | 0               | 0              | 0              | 0                | 0                | 40        | 0          | 0            | 0             | 0        | 0              | 0       | 0    | 0                        | 0         | 0     | 0                    | 0        |
| L67        | 0               | 0               | 0              | 0              | 0                | 0                | 22        | 16         | 0            | 0             | 2        | 0              | 0       | 0    | 0                        | 0         | 0     | 0                    | 0        |
| L79        | 0               | 0               | 0              | 0              | 0                | 0                | 40        | 0          | 0            | 0             | 0        | 0              | 0       | 0    | 0                        | 0         | 0     | 0                    | 0        |
| L79        | 0               | 0               | 0              | 0              | 0                | 0                | 0         | 0          | 0            | 40            | 0        | 0              | 0       | 0    | 0                        | 0         | 0     | 0                    | 0        |
| L79        | 0               | 0               | 0              | 0              | 0                | 0                | 0         | 0          | 0            | 40            | 0        | 0              | 0       | 0    | 0                        | 0         | 0     | 0                    | 0        |
| L79        | 0               | 0               | 0              | 0              | 0                | 0                | 0         | 0          | 0            | 40            | 0        | 0              | 0       | 0    | 0                        | 0         | 0     | 0                    | 0        |
| L79        | 0               | 0               | 0              | 0              | 0                | 0                | 0         | 0          | 0            | 3             | 0        | 0              | 0       | 0    | 15                       | 0         | 0     | 0                    | 0        |
| L79        | 0               | 0               | 0              | 0              | 0                | 28               | 0         | 0          | 0            | 12            | 0        | 0              | 0       | 0    | 0                        | 0         | 0     | 0                    | 0        |
| L79        | 0               | 0               | 0              | 0              | 0                | 19               | 0         | 0          | 0            | 21            | 0        | 0              | 0       | 0    | 0                        | 0         | 0     | 0                    | 0        |

Based on the abundance of dietary items in each category eight diet categories were identified and grouped as follows:

**Diet Category**

Brachyura L54, L58, L59, L64, L67, L77  
Copepoda L14, L16, L20  
Coral L66, L81, L86, L87  
Foraminifera L68, L69, L85, L88, L92  
Gnathiid L40, L51  
Macro-mollusc L37, L67, L72, L73, L76, L77, L78, L80, L83, L84, L94  
Micro-crustacea L1-L23  
Piscivore L34, L48, L71, L75, L82, L90

Species in these groups are as follows

Brachyura: *Choerodon cyanodus*, *Ch. graphicus*, *Gomphosus varius*, *Novaculichthys taeniourus*, *Pseudocheilinus octotaenia*, *Thalassoma janseni*  
Copepoda: *Stethojulis bandanensis*, *S. strigiventer*, *Thalassoma amblycephalum*  
Coral: *Diproctacanthus xanthurus*, *Labrichthys unilineatus*, *Labropsis australis*, *Labropsis xanthonota*  
Foraminifera: *Halichoeres melasmapomus*, *Macropharyngodon choati*, *M. meleagris*, *M. negrosensis*  
Gnathiid: *Labroides dimidiatus*, *L. pectoralis*  
Macro-mollusc: *Bodianus loxozonus*, *Cheilinus fasciatus*, *Choerodon anchorago*, *Ch. cyanodous*, *Ch. graphicus*, *Ch. schoenleinii*, *Coris aygula*, *C. gaimard*, *Halichoeres hartzfeldii*, *H. hortulanus*, *Thalassoma trilobatum*  
Micro-crustacea: *Anampses caeruleopunctatus*, *A. geographicus*, *A. neoguinaicus*, *Choerodon cephalotes*, *Ch. Sugillatum*, *Ch. Vitta*, *Cirrhilabrus exquisitus*, *Cirr. lineatus*, *Cirr. punctatus*, *Cymolutes torquatus*, *Halichoeres melanurus*, *H. miniatus*, *Hemigymnus fasciatus*, *Hemi. melapterus*, *Leptojuilis cyanopleura*, *Pseudocheilinus evanidus*, *Ps. hexataenia*, *Pseudocoris yamashiroi*, *Pseudojuloides cerasinus*, *Stethojulis bandanensis*, *S. iterrupta*, *S. strigiventer*, *S. trilineata*, *Thalassoma amblycephalum*  
Piscivore: *Cheilio inermis*, *Epibulus insidiator*, *Hologymnosus annulatus*, *Holo. doliatus*, *Oxycheilinus digramma*, *O. unifasciatus*
